# Supplementary material
Source: PubMed Central journal article supplement (PMC8045497)

## Supplemental Data 2

Figures of relative inhibition and synergy (ZIP) for ruxolitinib combinations in seven cell lines (pages 1-19) and healthy peripheral blood mononuclear cells (PBMCs) from two individuals (pages 20-27). Indicated drug concentrations are given in nanomoles (nM). The drug combination responses were calculated based on ZIP model using SynergyFinder (<https://synergyfinder.fimm.fi/>)<sup>29-30</sup> and re-visualized in RStudio.

| <b>Treatments in cell lines</b>                                 | <b>Page</b> |
|-----------------------------------------------------------------|-------------|
| Dexamethasone and ruxolitinib based on viability readout        | 2           |
| Dexamethasone and ruxolitinib based on toxicity readout         | 3           |
| Methylprednisolone and ruxolitinib based on viability readout   | 4           |
| Methylprednisolone and ruxolitinib based on toxicity readout    | 5           |
| S-63845 and ruxolitinib based on viability readout              | 6           |
| S-63845 and ruxolitinib based on toxicity readout               | 7           |
| Navitoclax and ruxolitinib based on viability readout           | 8           |
| Navitoclax and ruxolitinib based on toxicity readout            | 9           |
| Venetoclax and ruxolitinib based on viability readout           | 10          |
| Venetoclax and ruxolitinib based on toxicity readout            | 11          |
| Idasanutlin and ruxolitinib based on viability readout          | 12          |
| Idasanutlin and ruxolitinib based on toxicity readout           | 13          |
| Siremadlin (HDM-201) and ruxolitinib based on viability readout | 14          |
| Siremadlin (HDM-201) and ruxolitinib based on toxicity readout  | 15          |
| Tipifarnib and ruxolitinib based on viability readout           | 16          |
| Tipifarnib and ruxolitinib based on toxicity readout            | 17          |
| Lonafarnib and ruxolitinib based on viability readout           | 18          |
| Lonafarnib and ruxolitinib based on toxicity readout            | 19          |
| <b>Treatments in healthy PBMCs</b>                              |             |
| Dexamethasone and ruxolitinib based on viability readout        | 20          |
| Dexamethasone and ruxolitinib based on toxicity readout         | 21          |
| Tipifarnib and ruxolitinib based on viability readout           | 22          |
| Tipifarnib and ruxolitinib based on toxicity readout            | 23          |
| S-63845 and ruxolitinib based on viability readout              | 24          |
| S-63845 and ruxolitinib based on toxicity readout               | 25          |
| Idasanutlin and ruxolitinib based on viability readout          | 26          |
| Idasanutlin and ruxolitinib based on toxicity readout           | 27          |

Cell lines: Relative inhibition (%) and synergy (ZIP) for dexamethasone and ruxolitinib based on viability readout

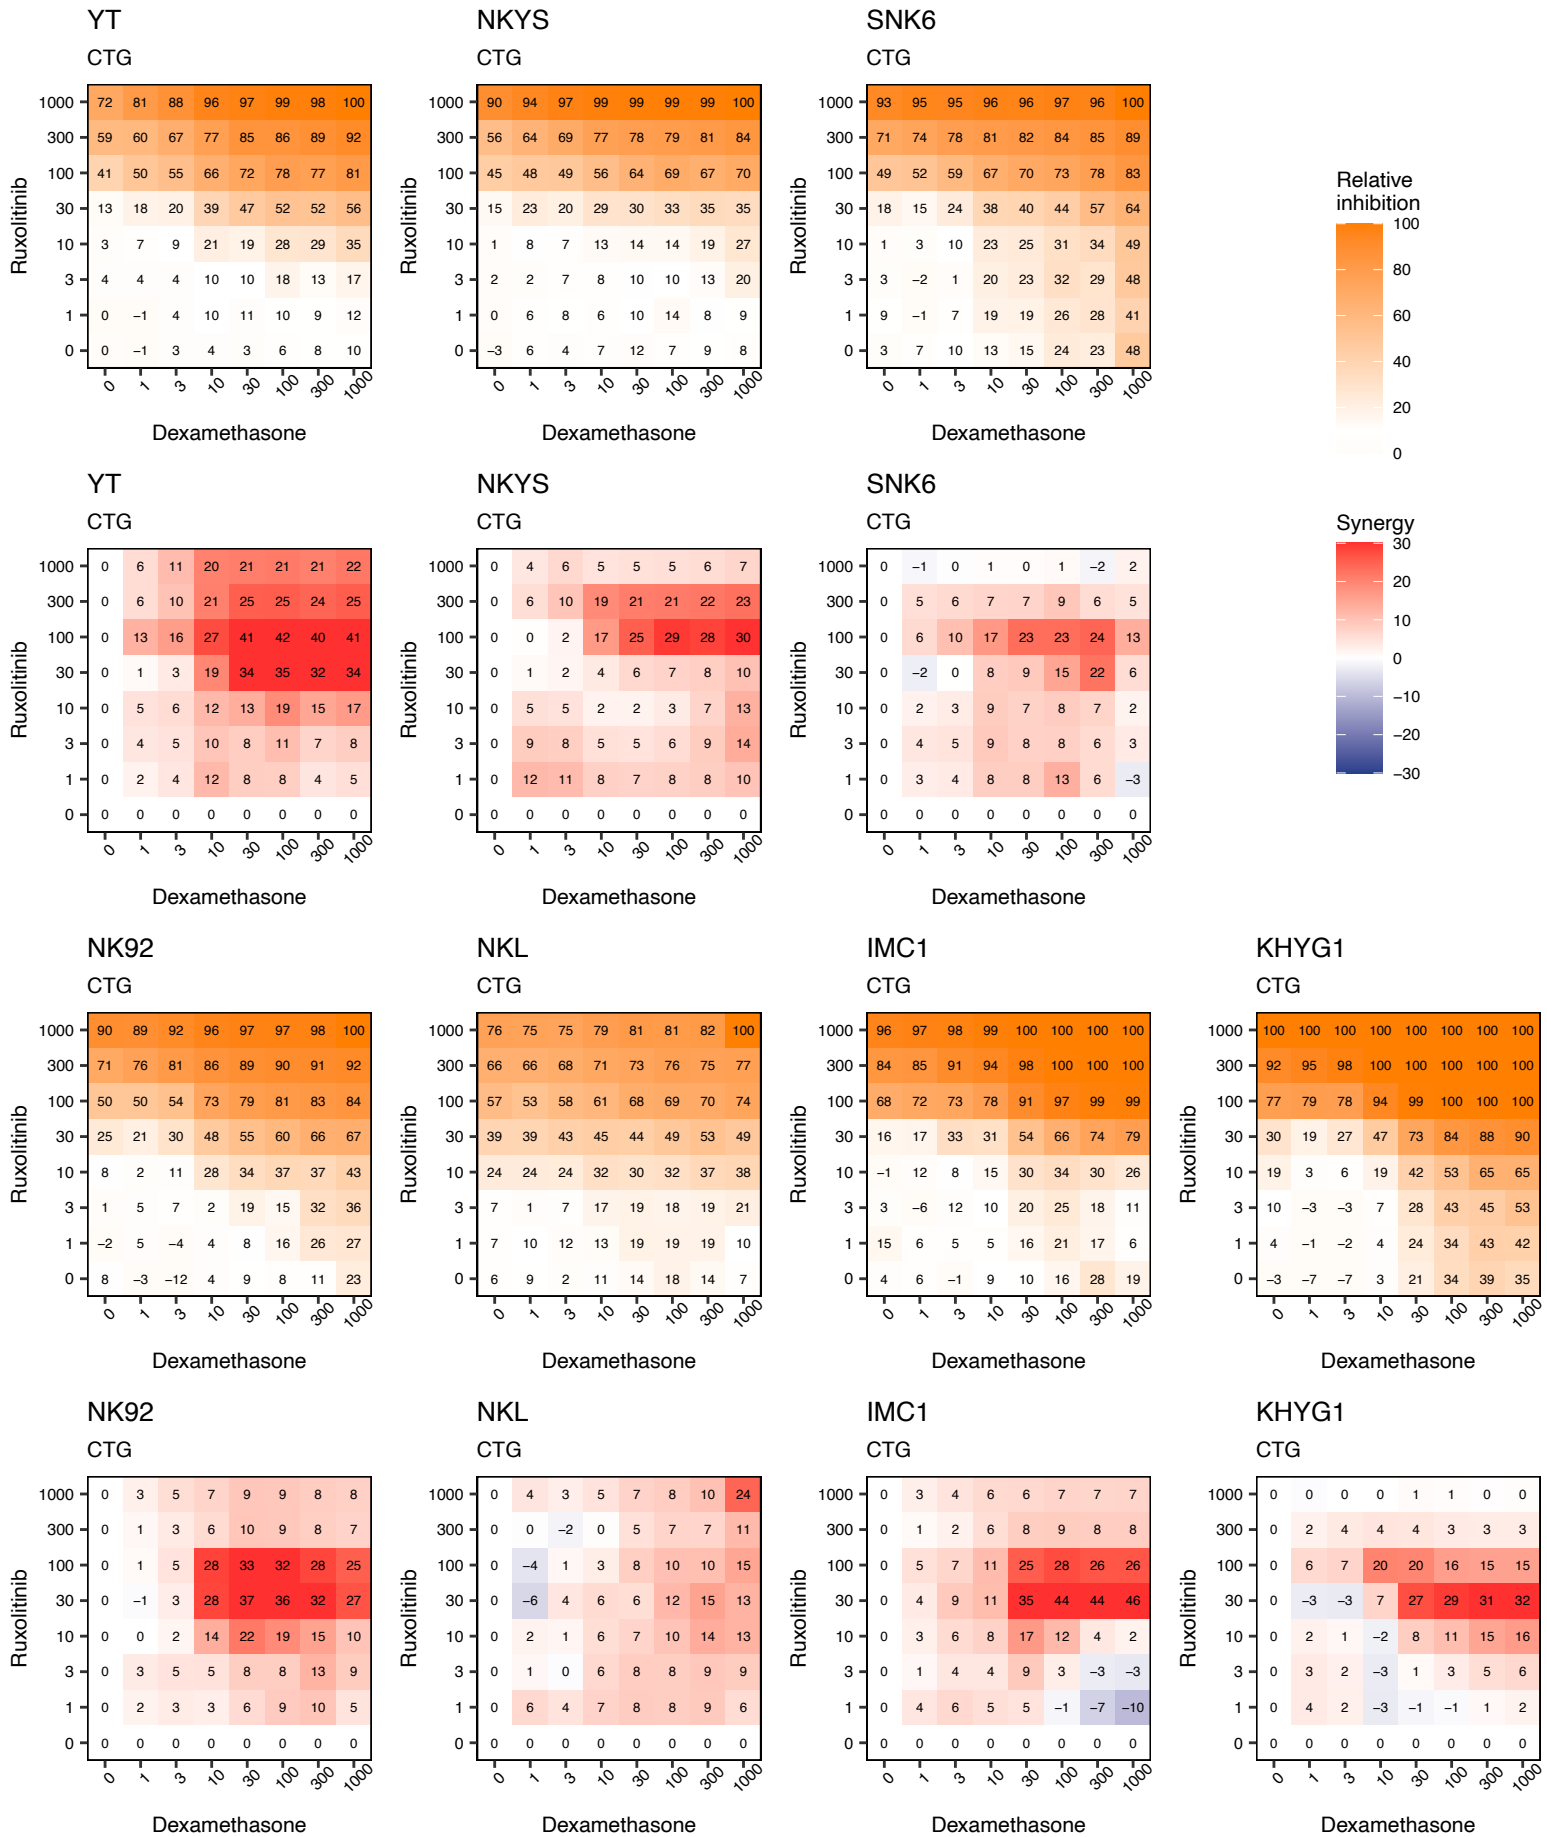

Cell lines: Relative inhibition (%) and synergy (ZIP) for dexamethasone and ruxolitinib based on toxicity readout

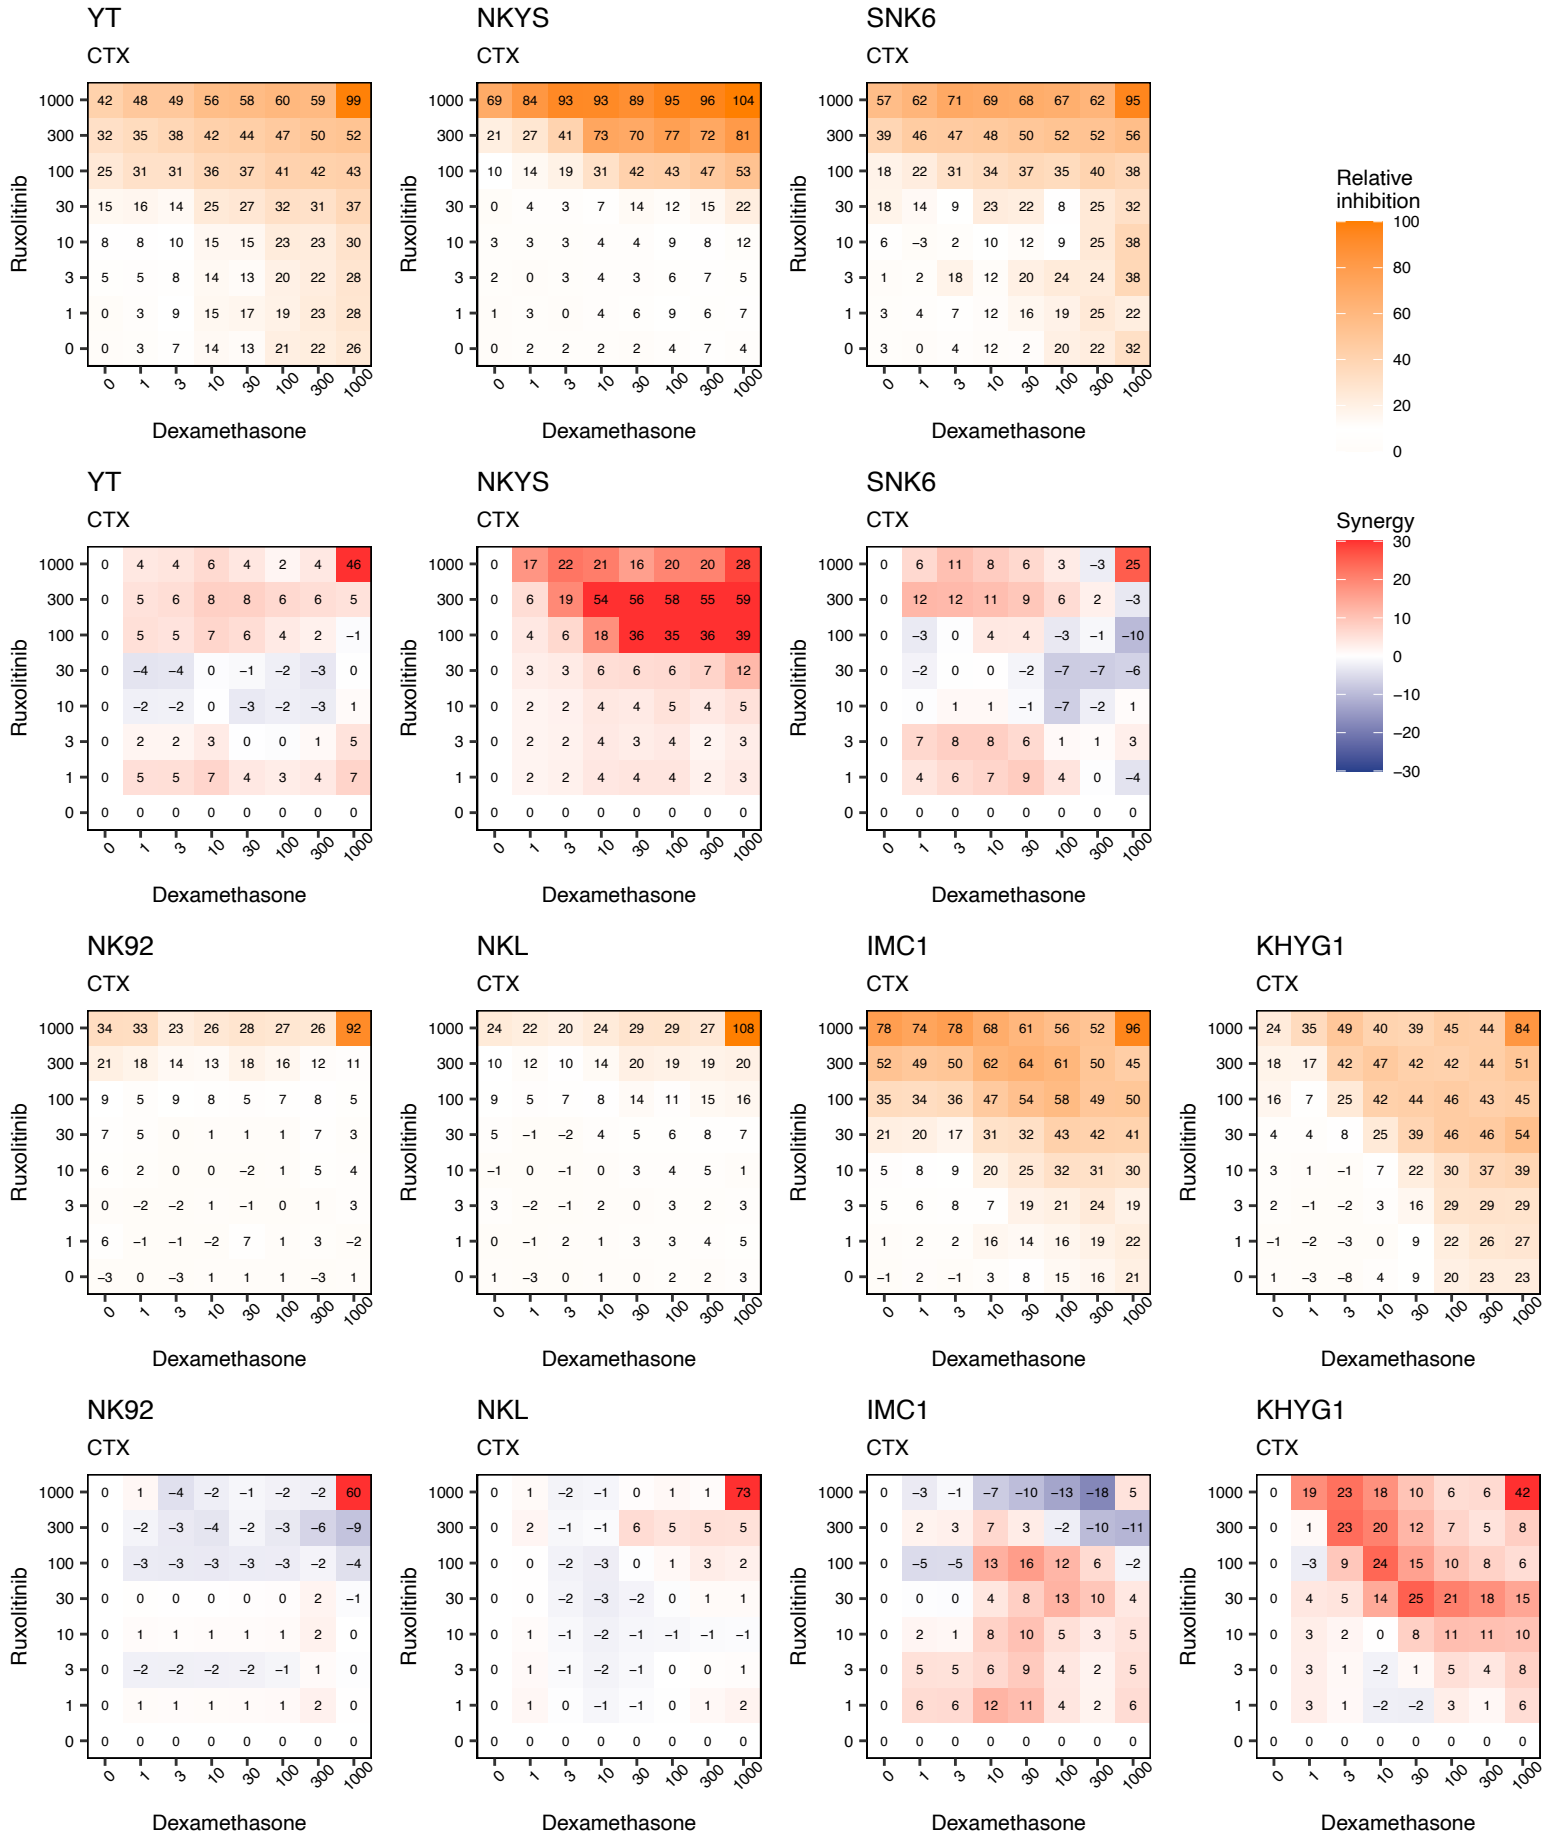

Cell lines: Relative inhibition (%) and synergy (ZIP) for methylprednisolone and ruxolitinib based on viability readout

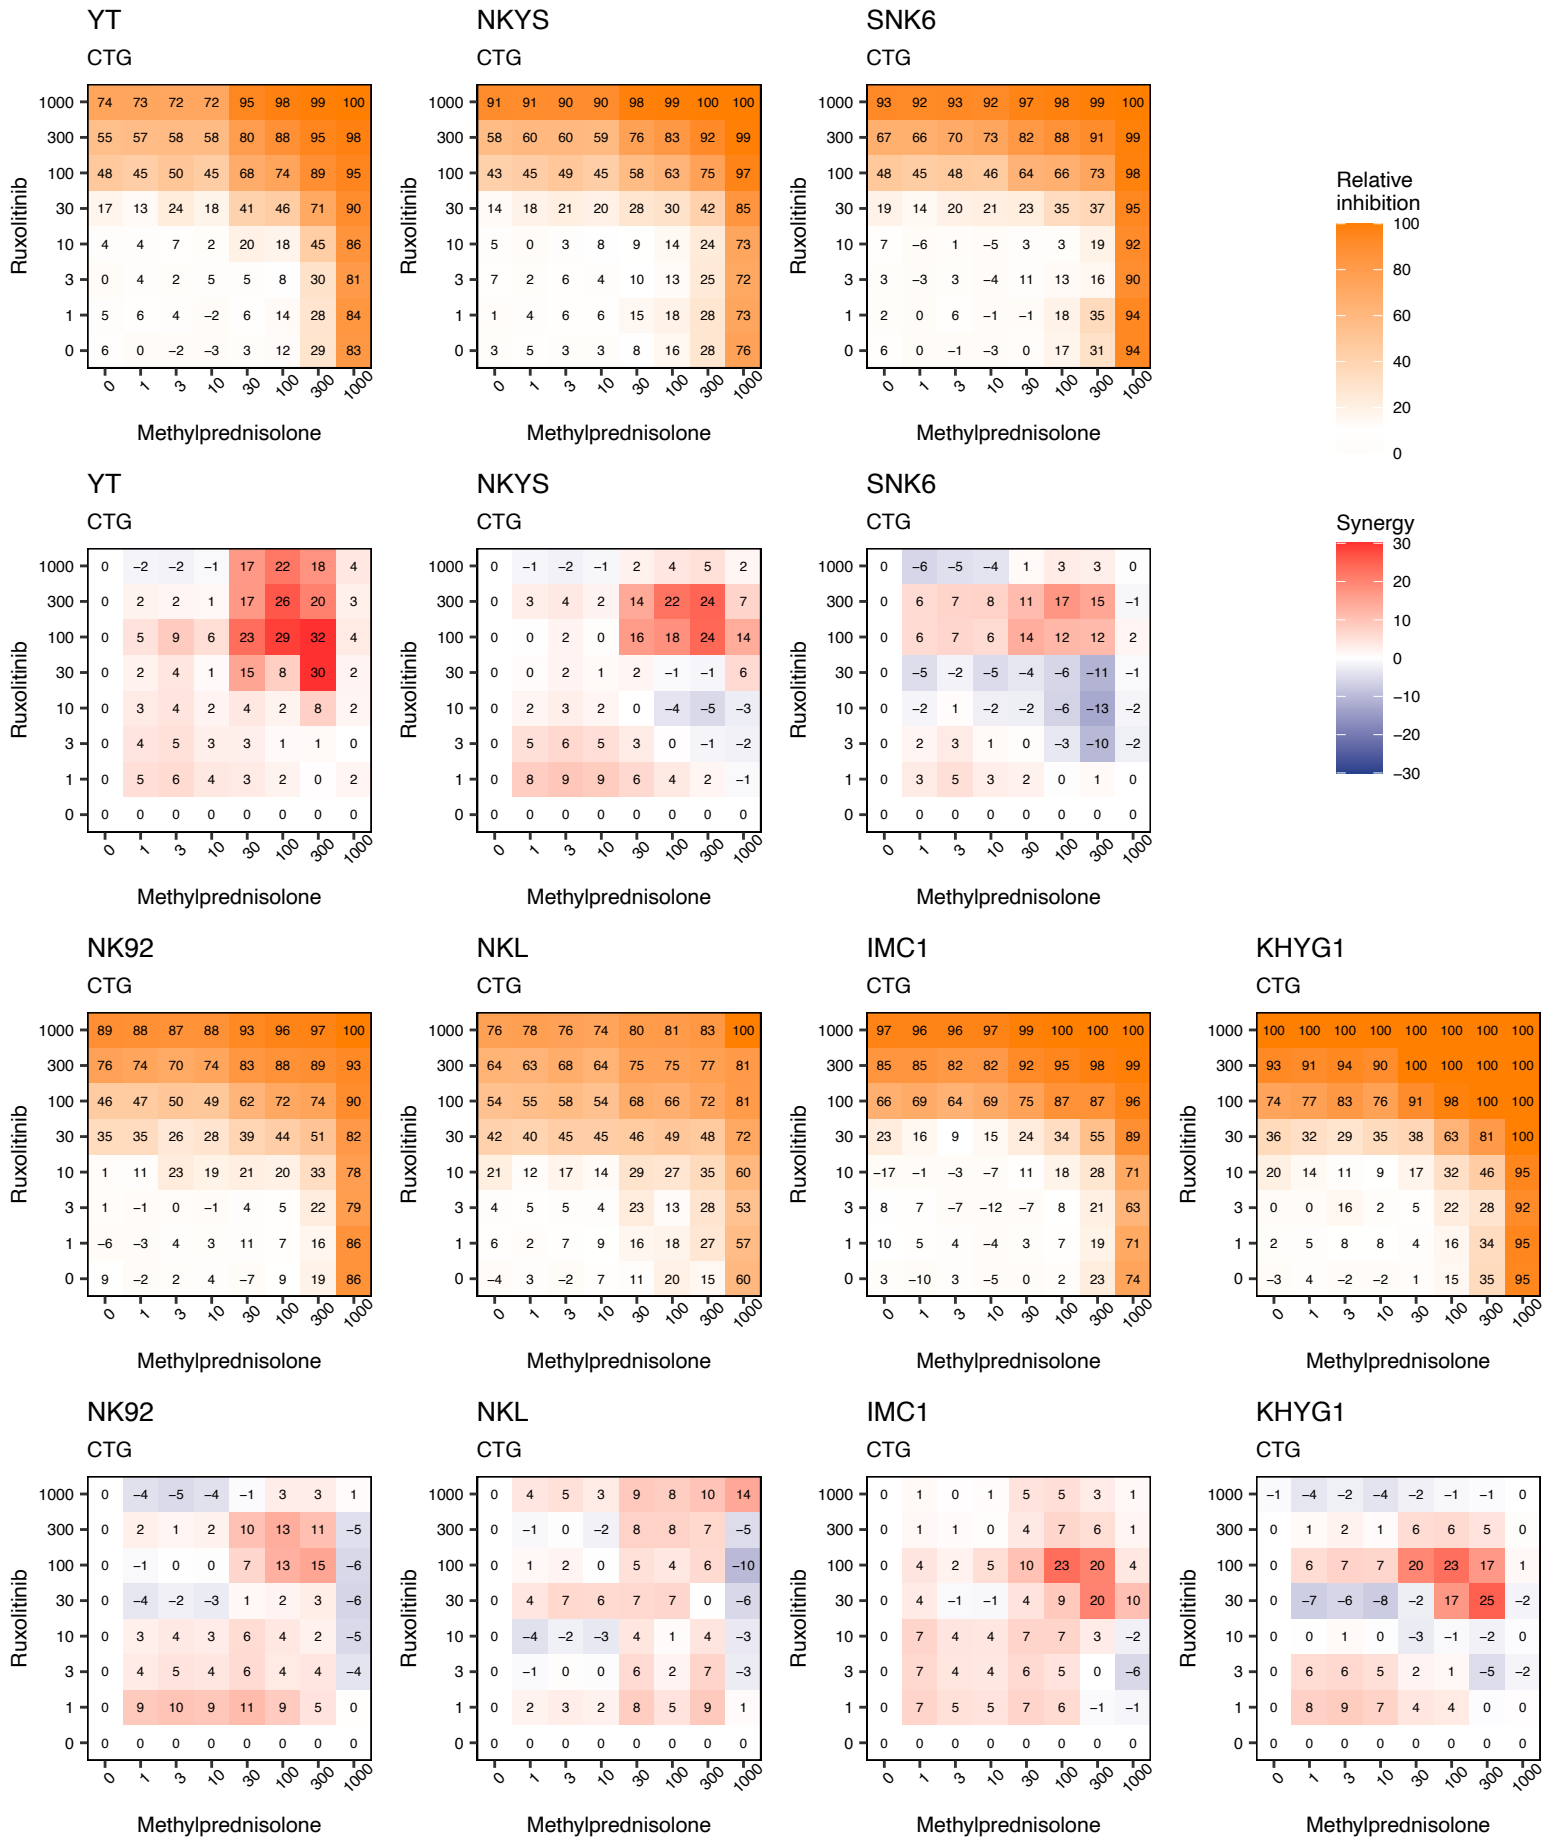

Cell lines: Relative inhibition (%) and synergy (ZIP) for methylprednisolone and ruxolitinib based on toxicity readout

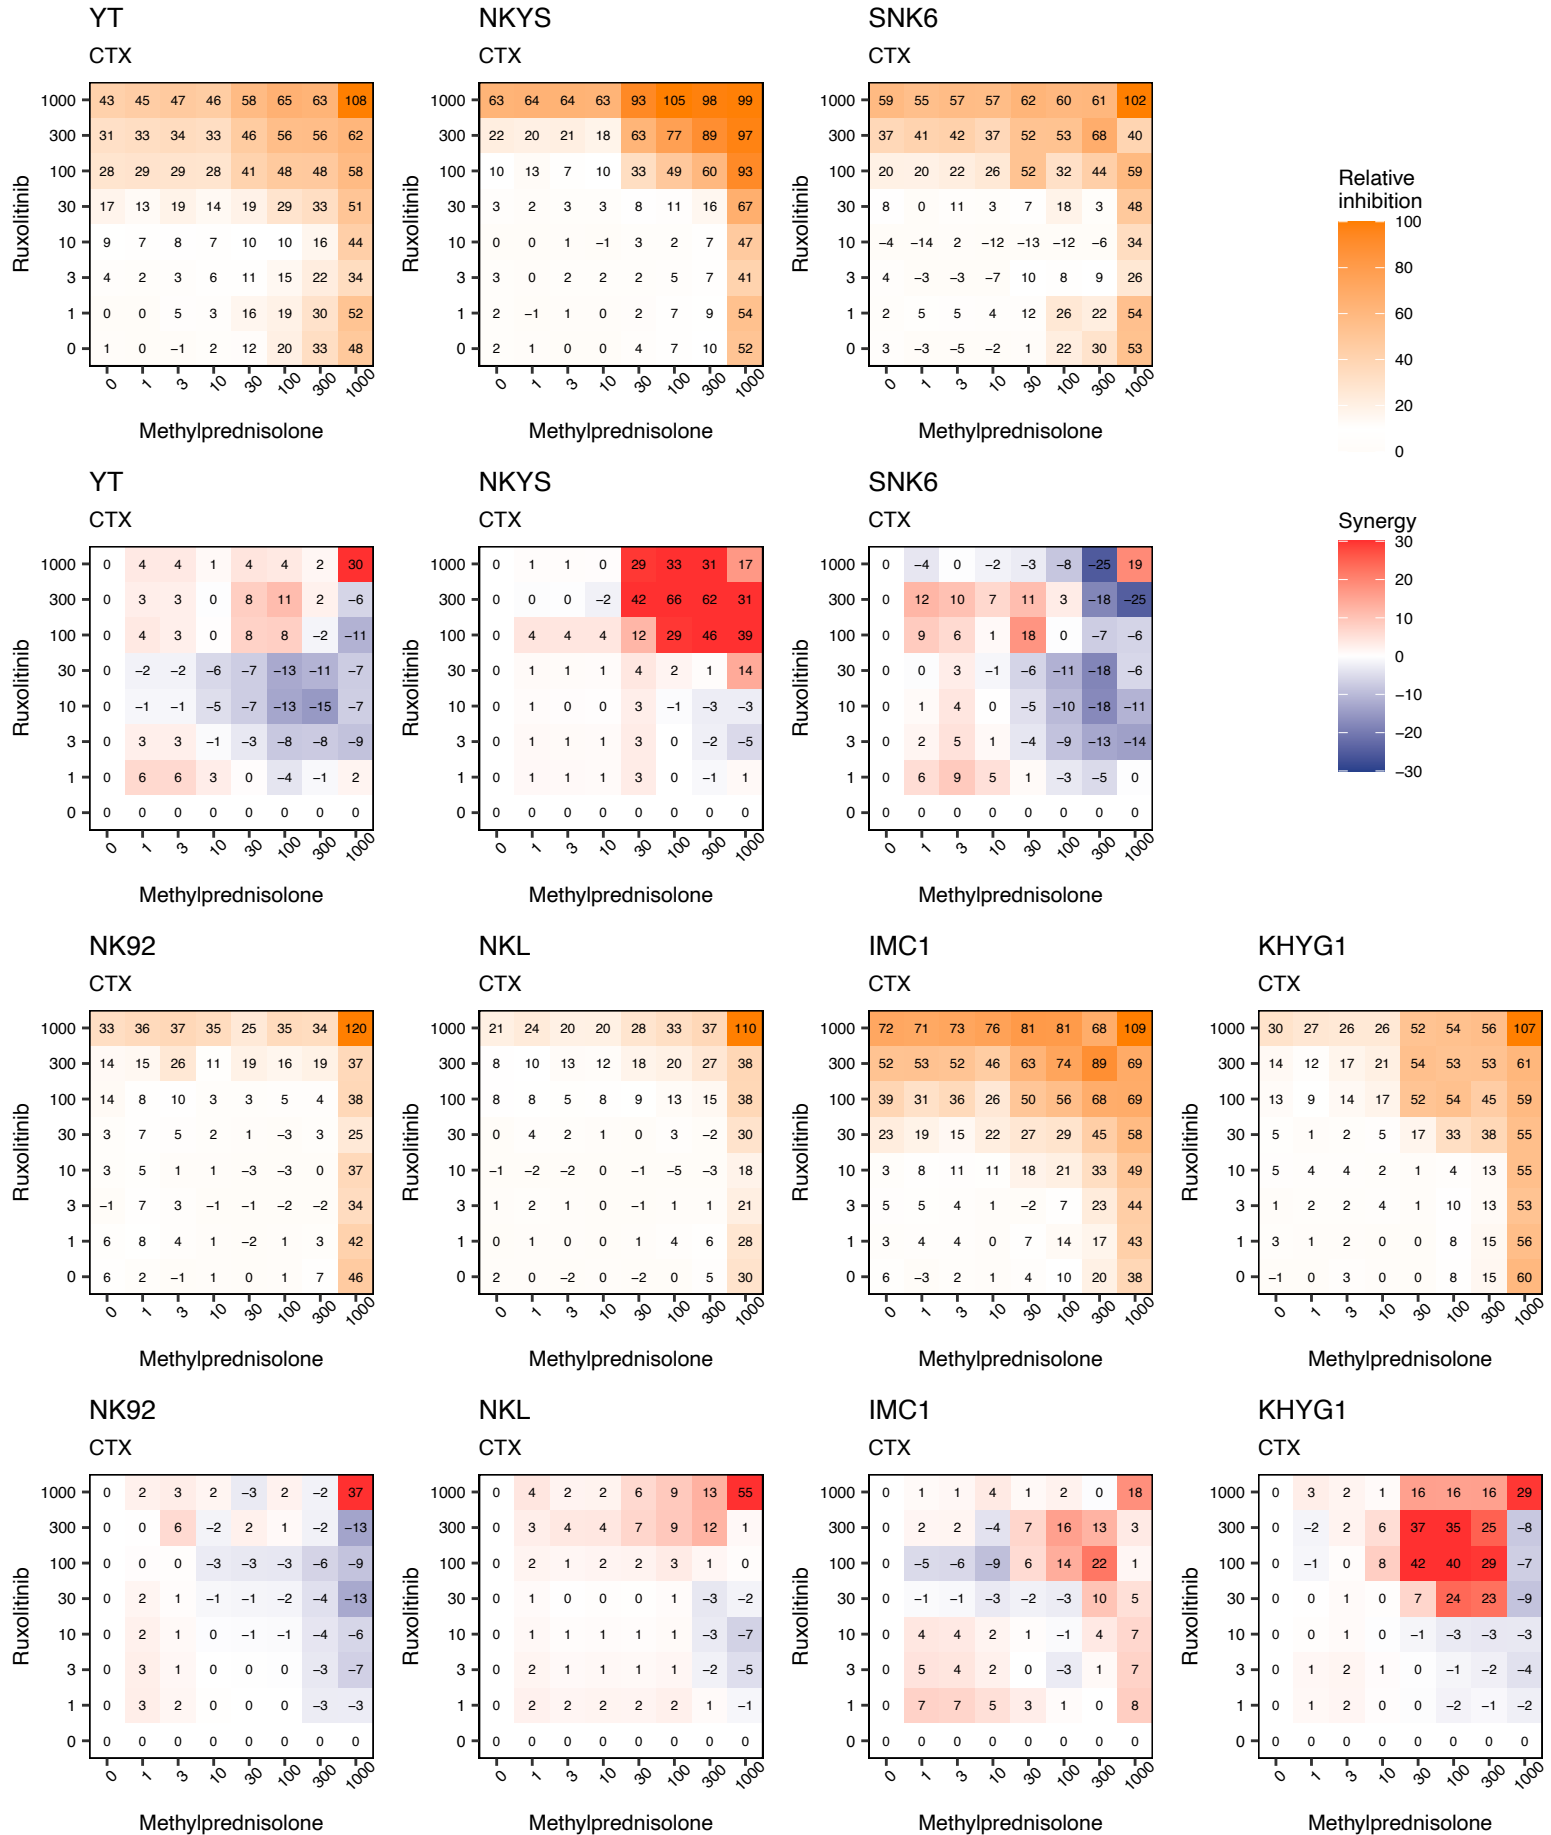

Cell lines: Relative inhibition (%) and synergy (ZIP) for S-63845 and ruxolitinib based on viability readout

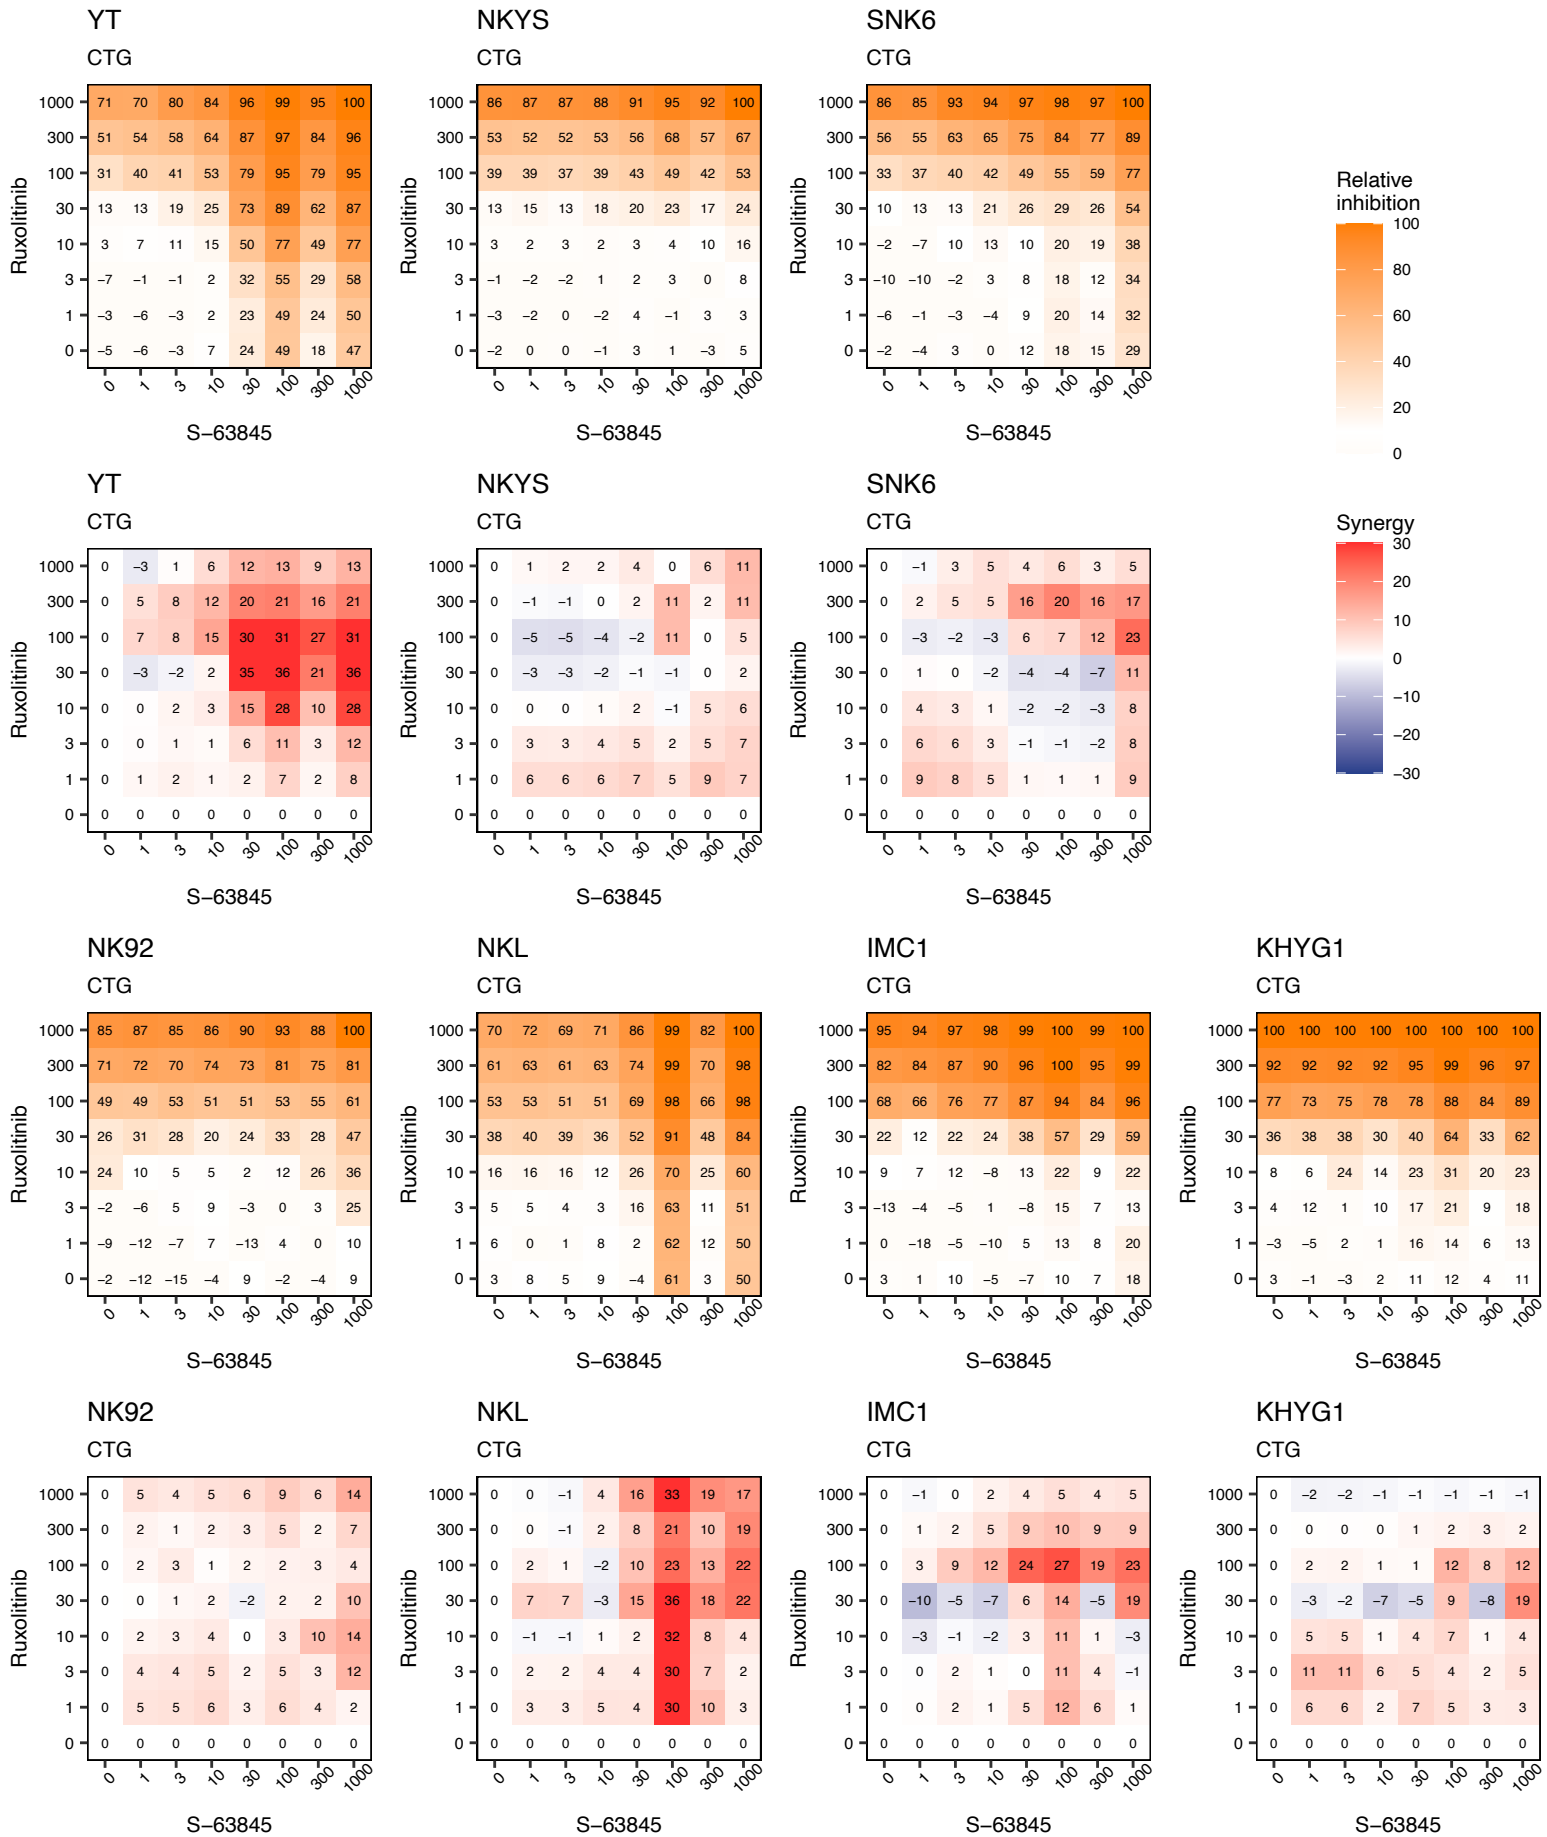

Cell lines: Relative inhibition (%) and synergy (ZIP) for S-63845 and ruxolitinib based on toxicity readout

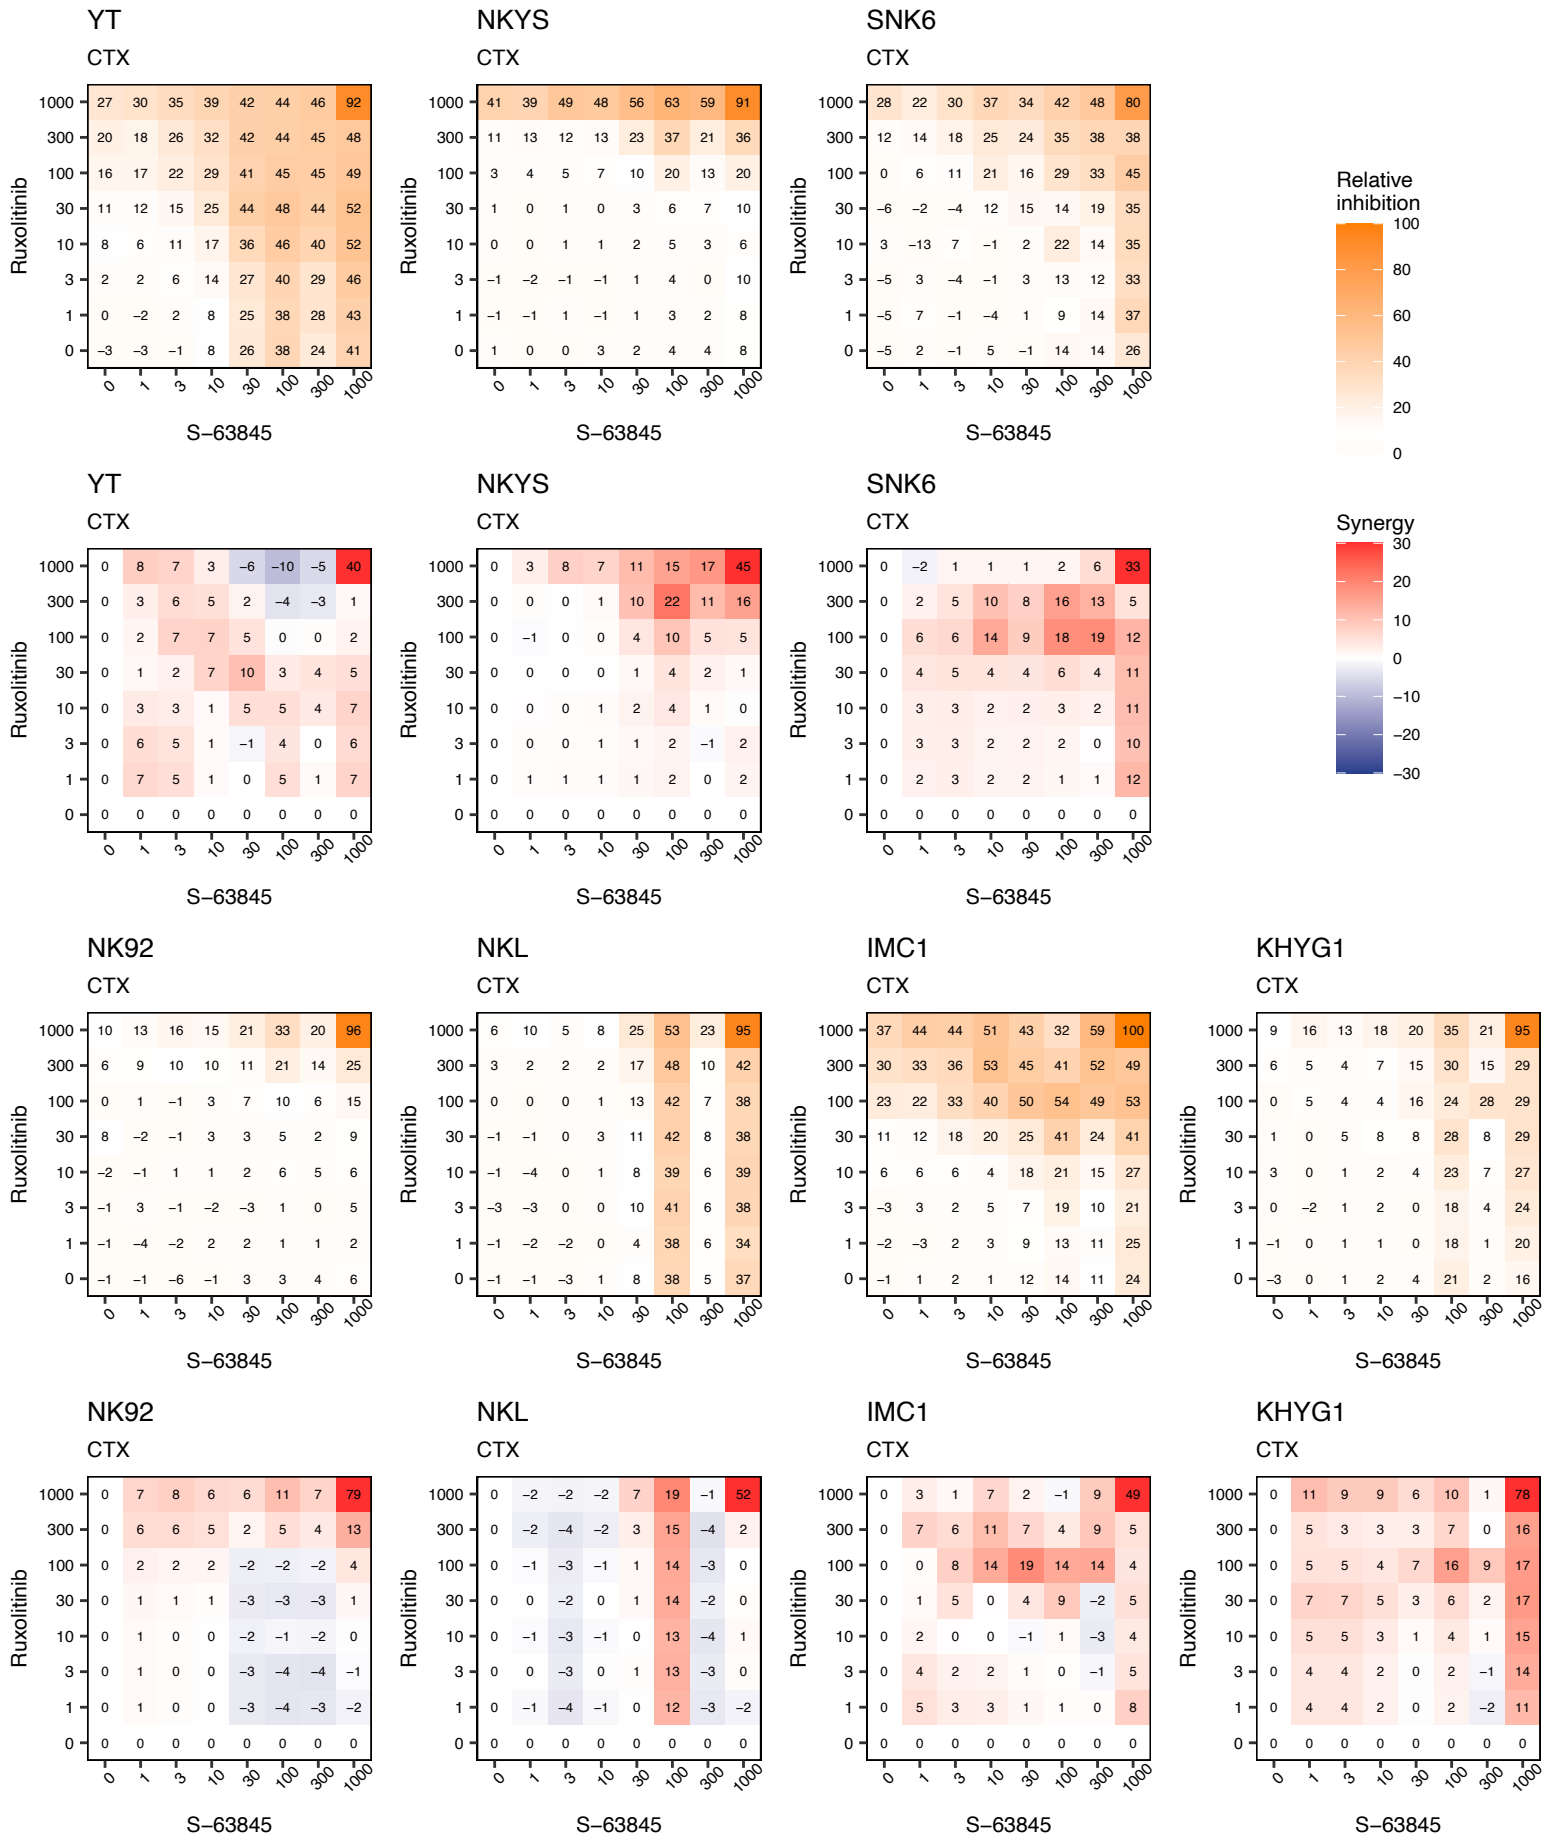

Cell lines: Relative inhibition (%) and synergy (ZIP) for navitoclax and ruxolitinib based on viability readout

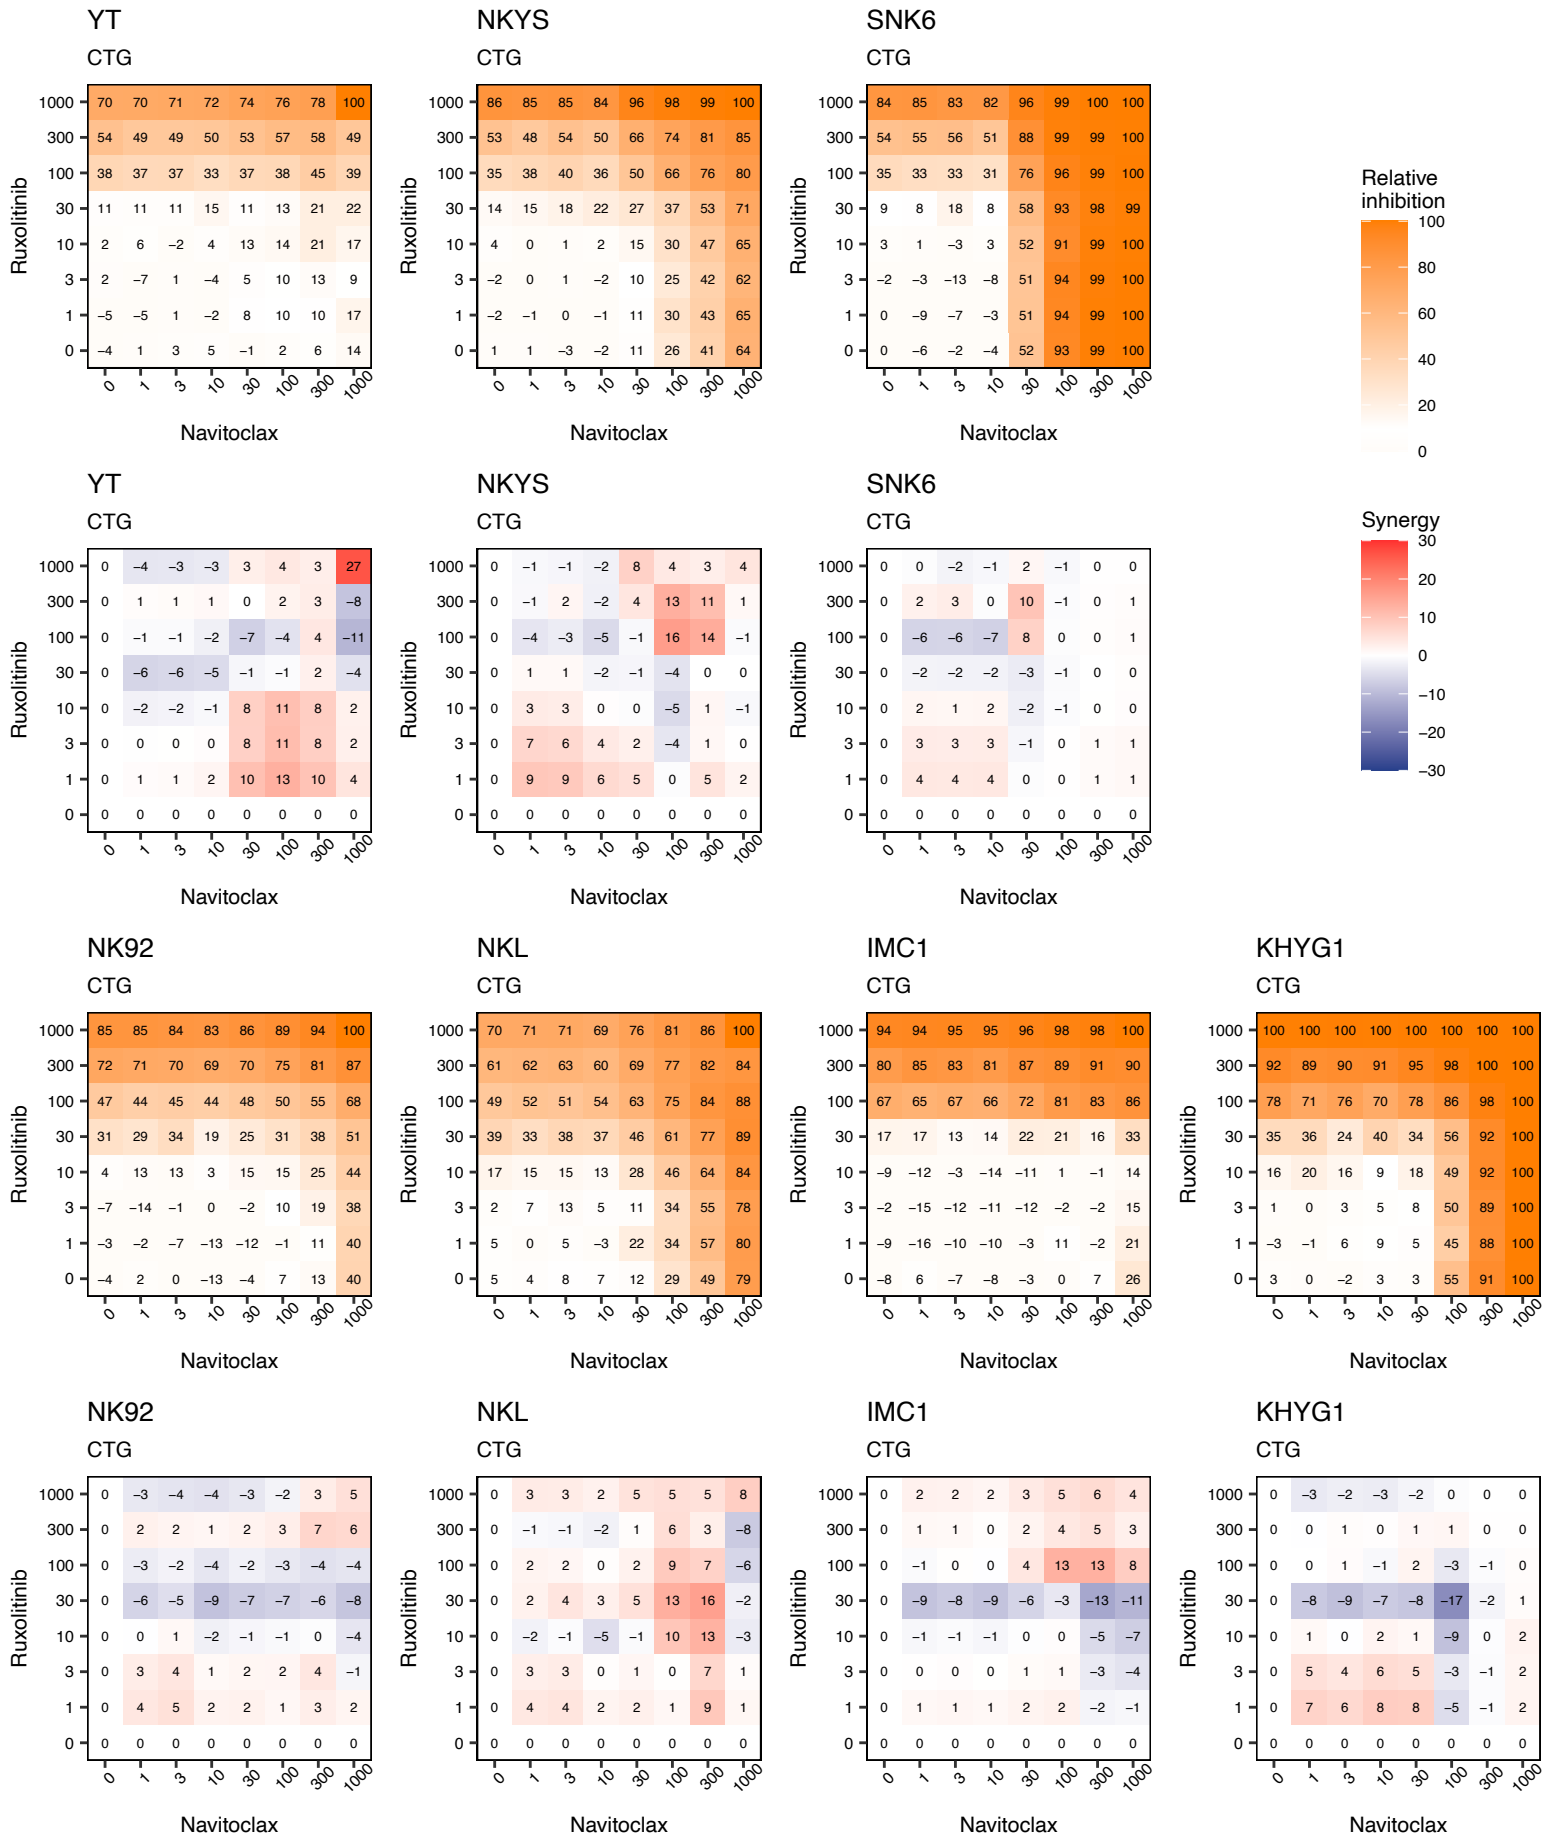



Cell lines: Relative inhibition (%) and synergy (ZIP) for navitoclax and ruxolitinib based on toxicity readout

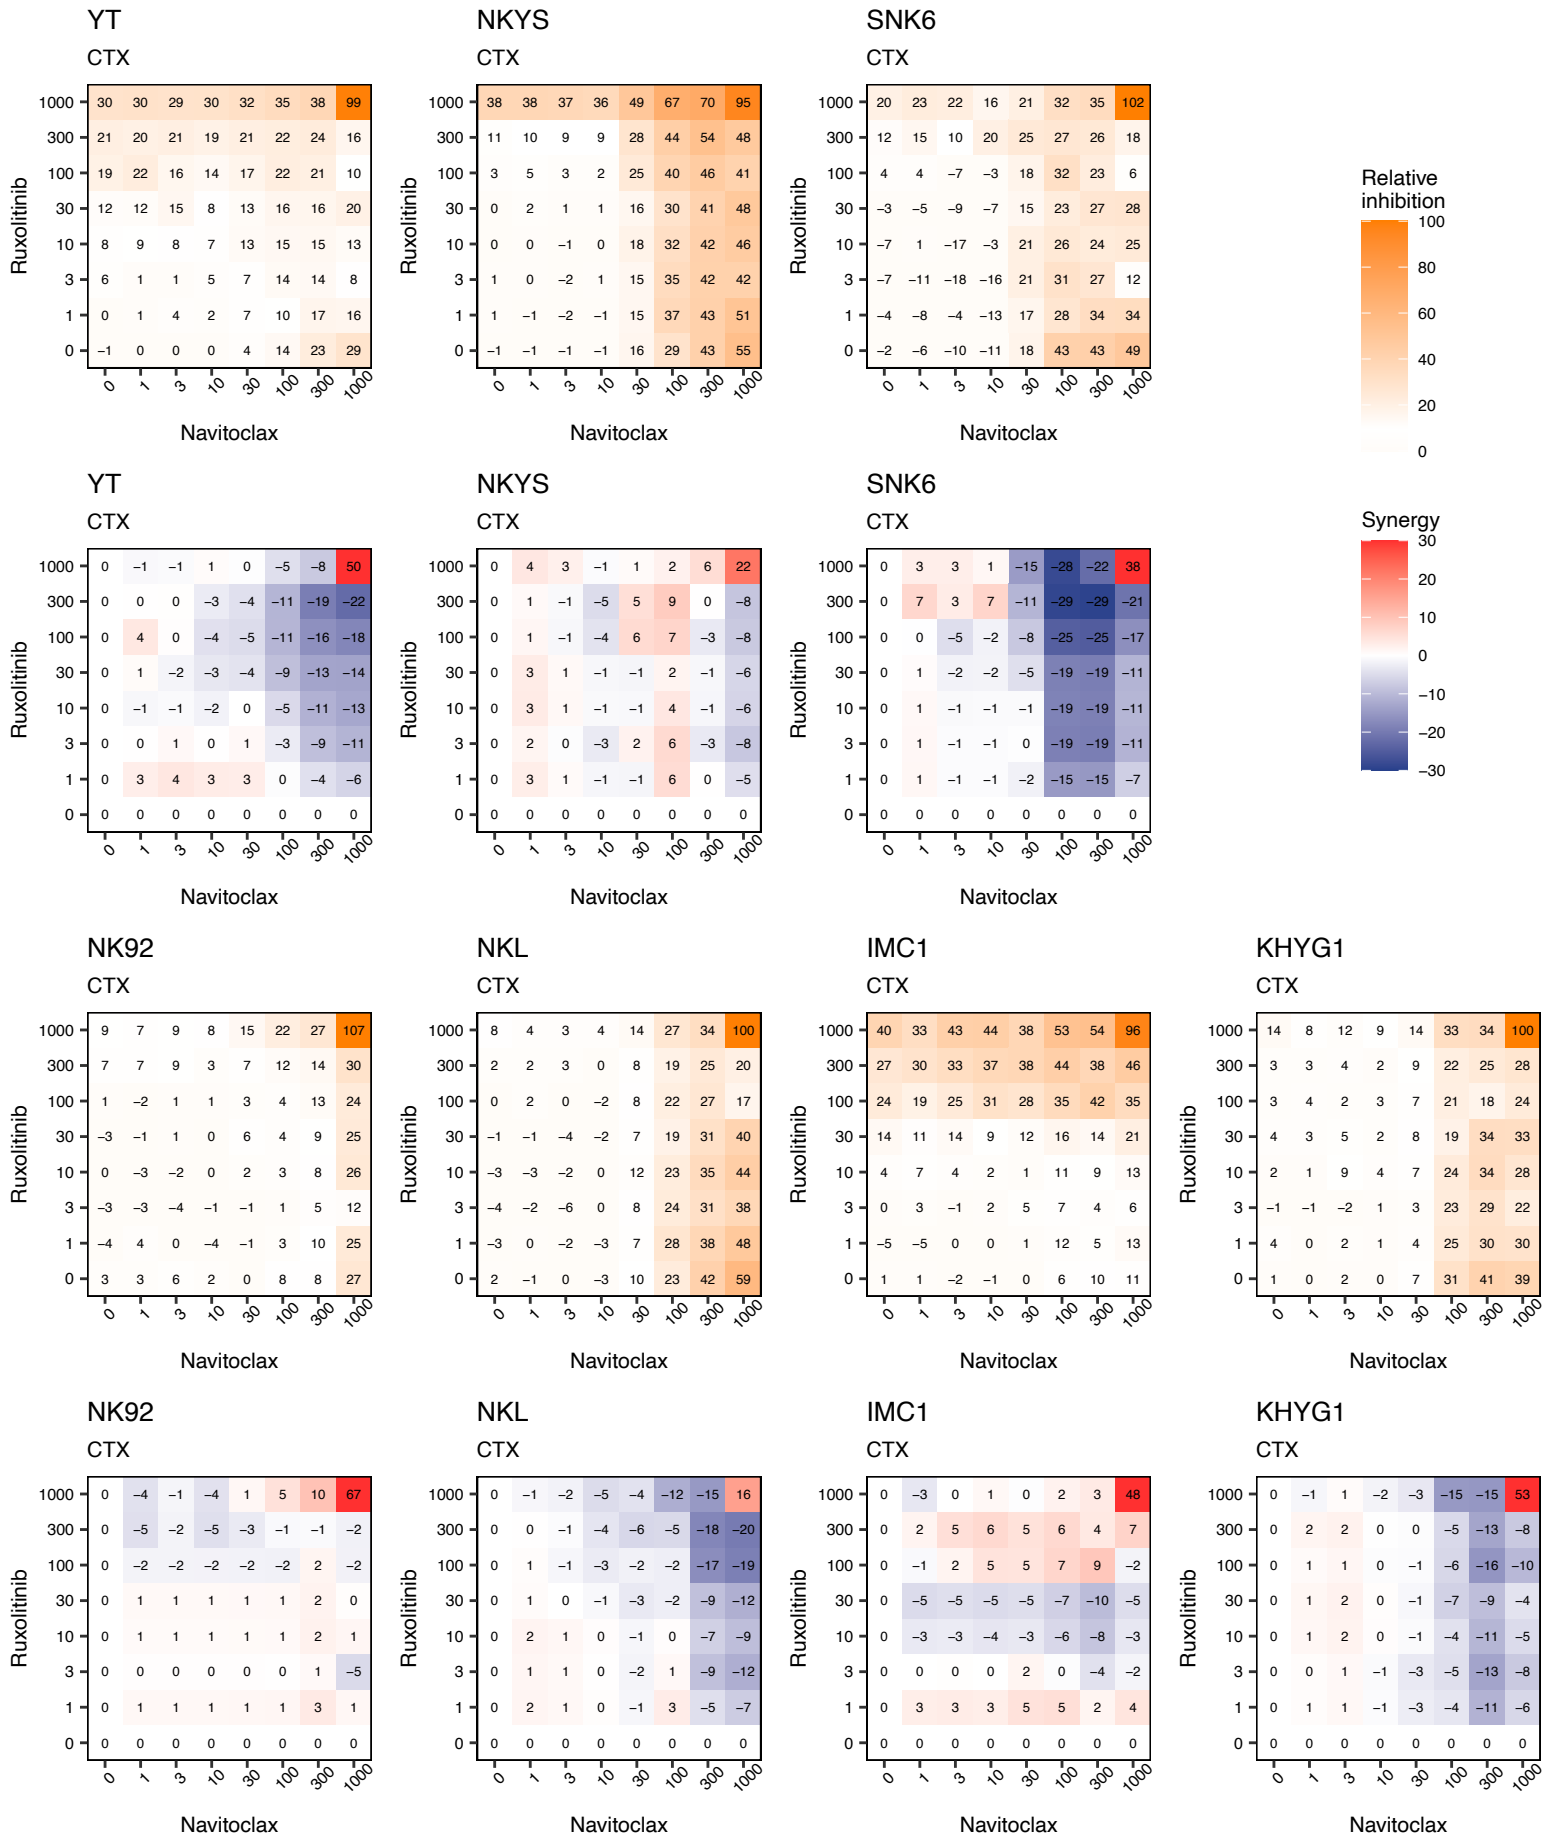

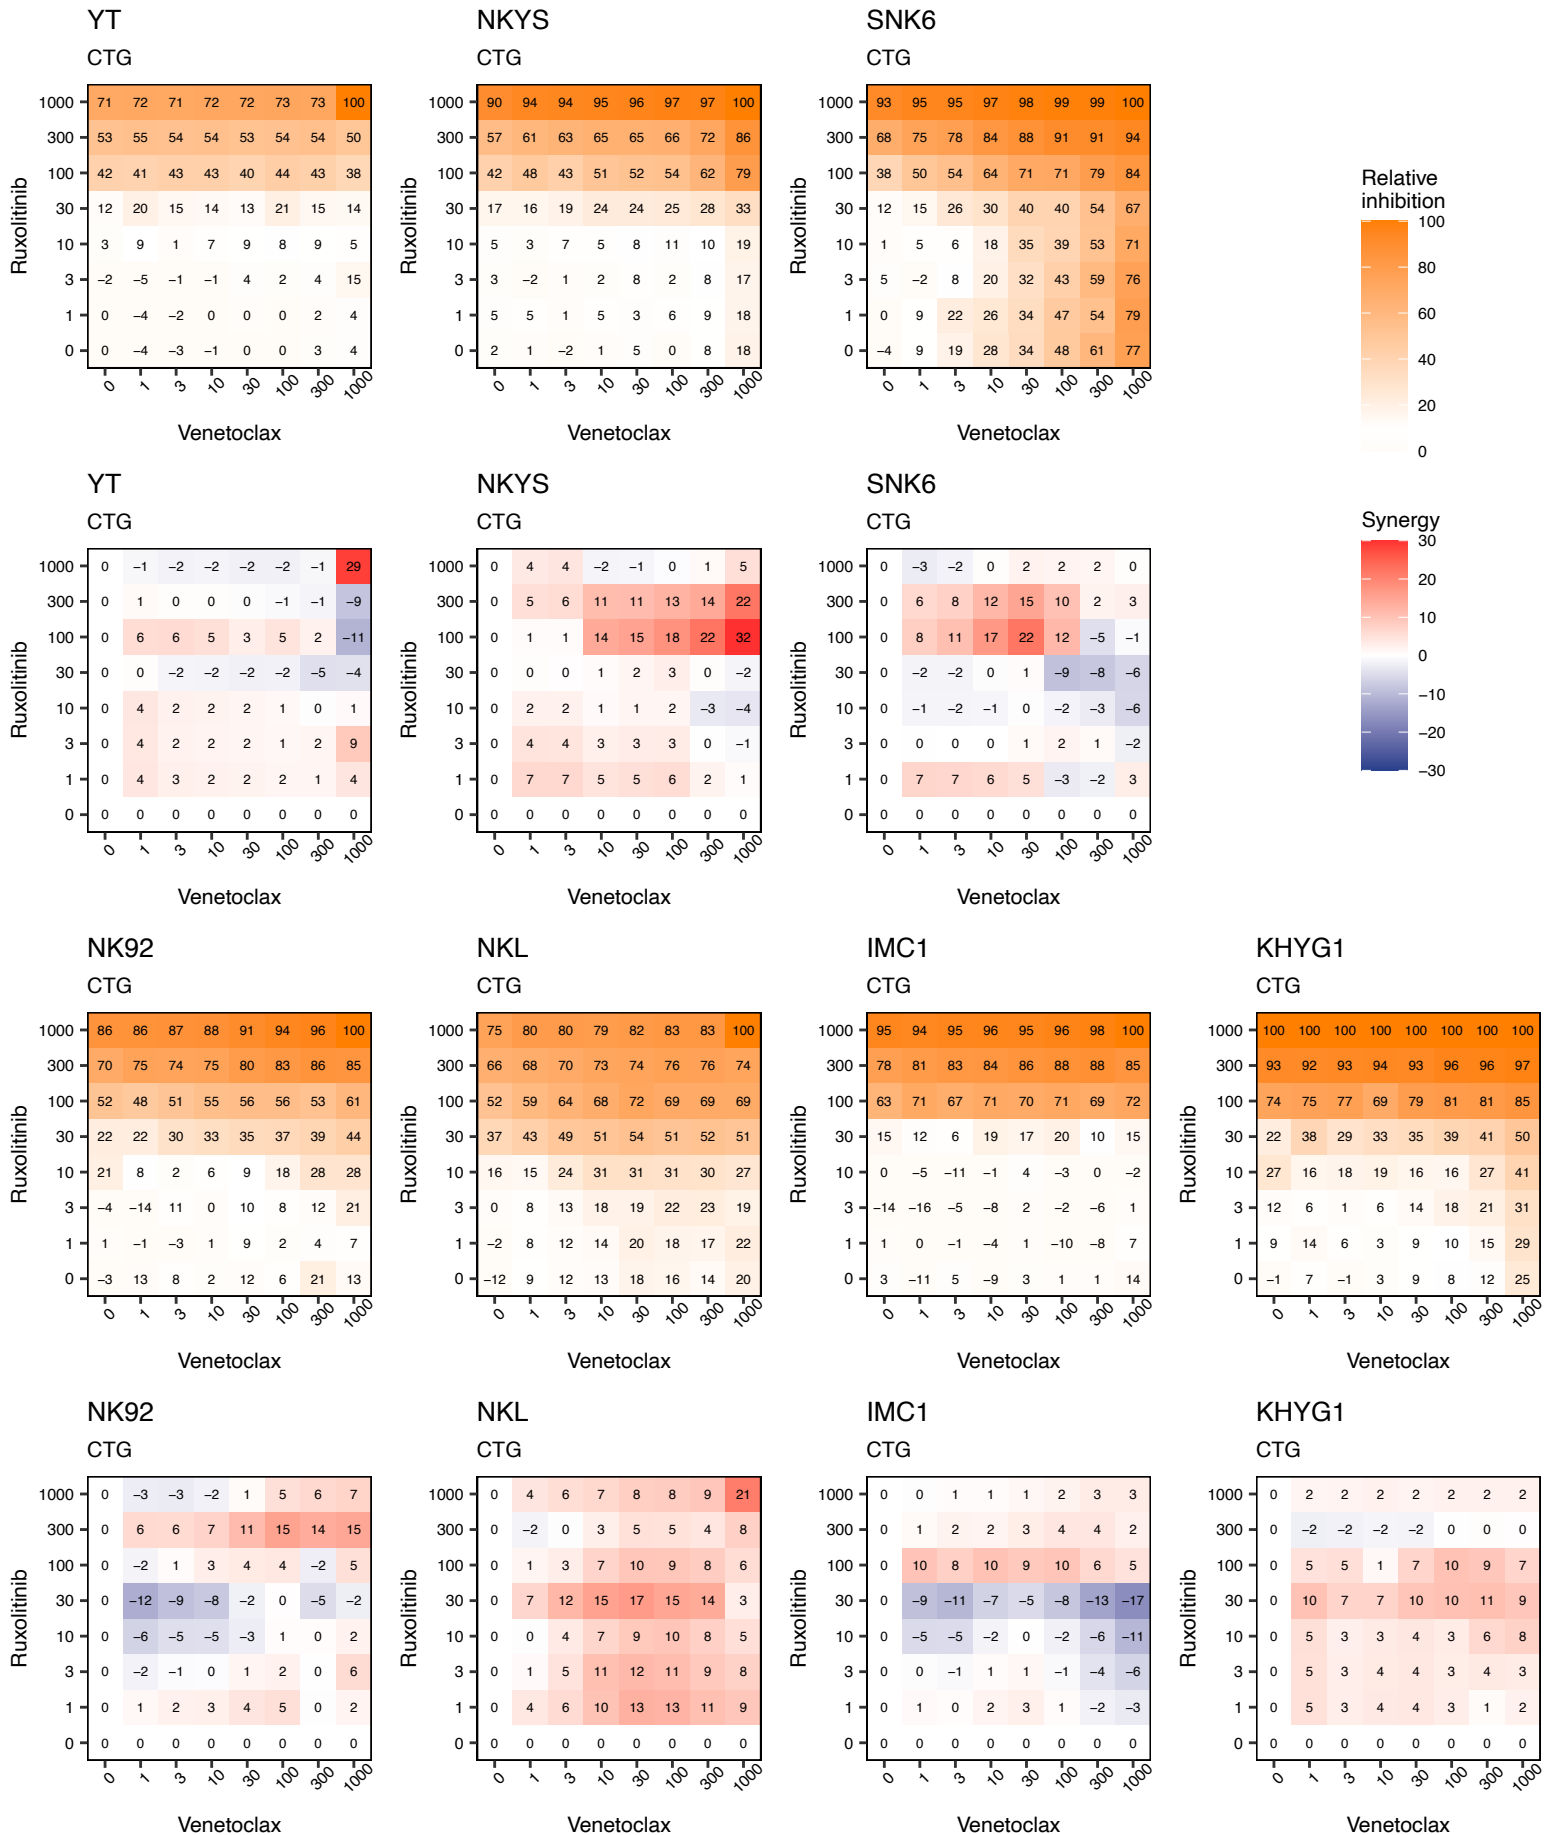

Cell lines: Relative inhibition (%) and synergy (ZIP) for venetoclax and ruxolitnib based on toxicity readout

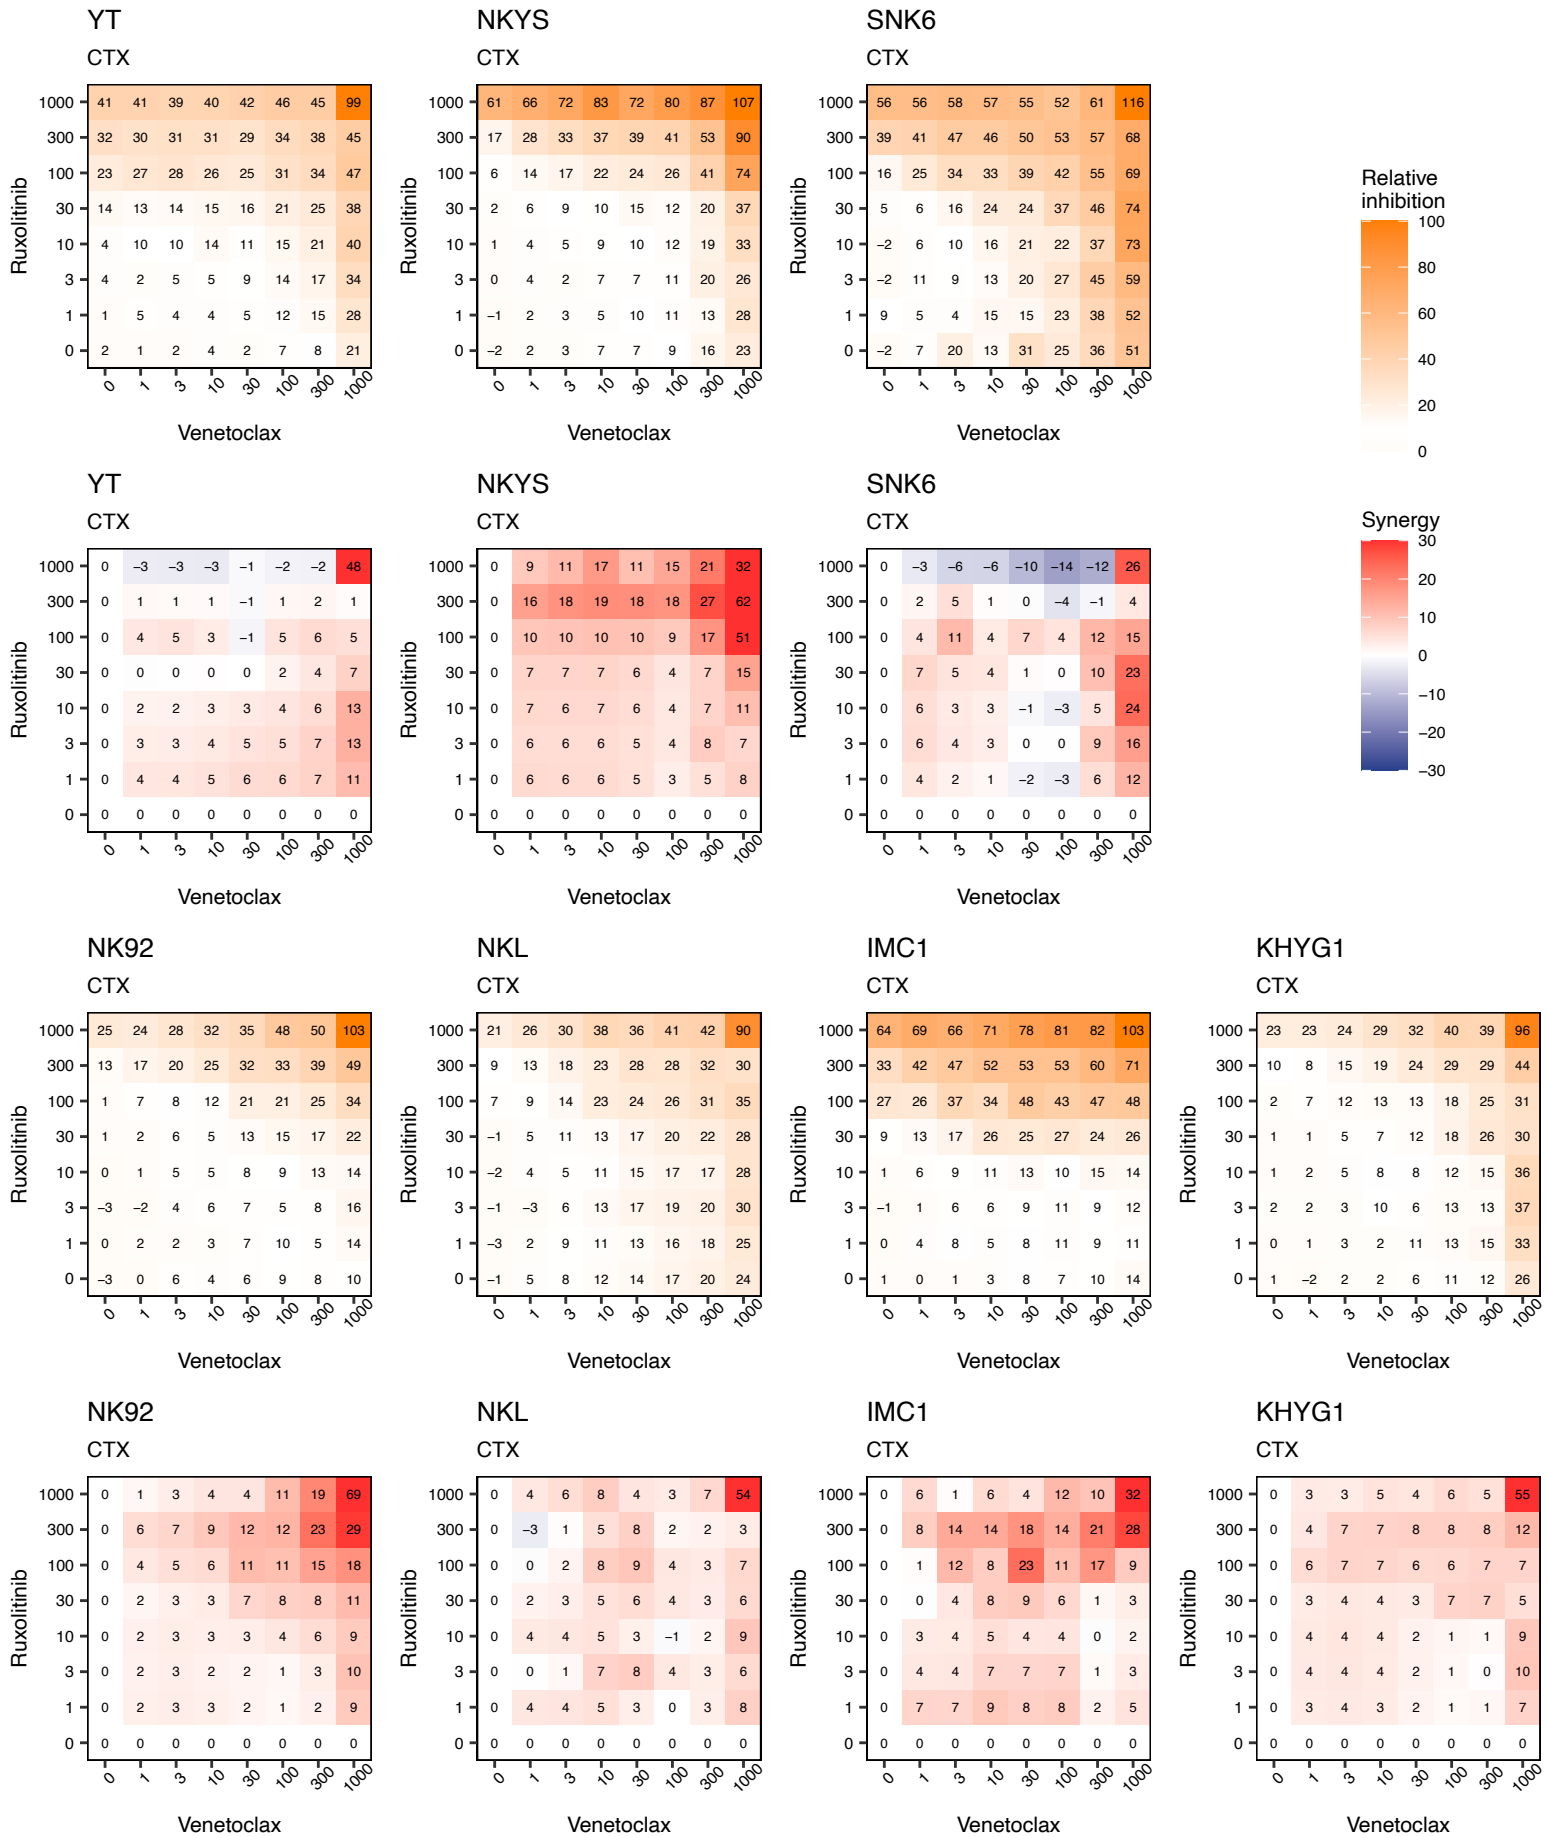

Cell lines: Relative inhibition (%) and synergy (ZIP) for idasanutlin and ruxolitinib based on viability readout

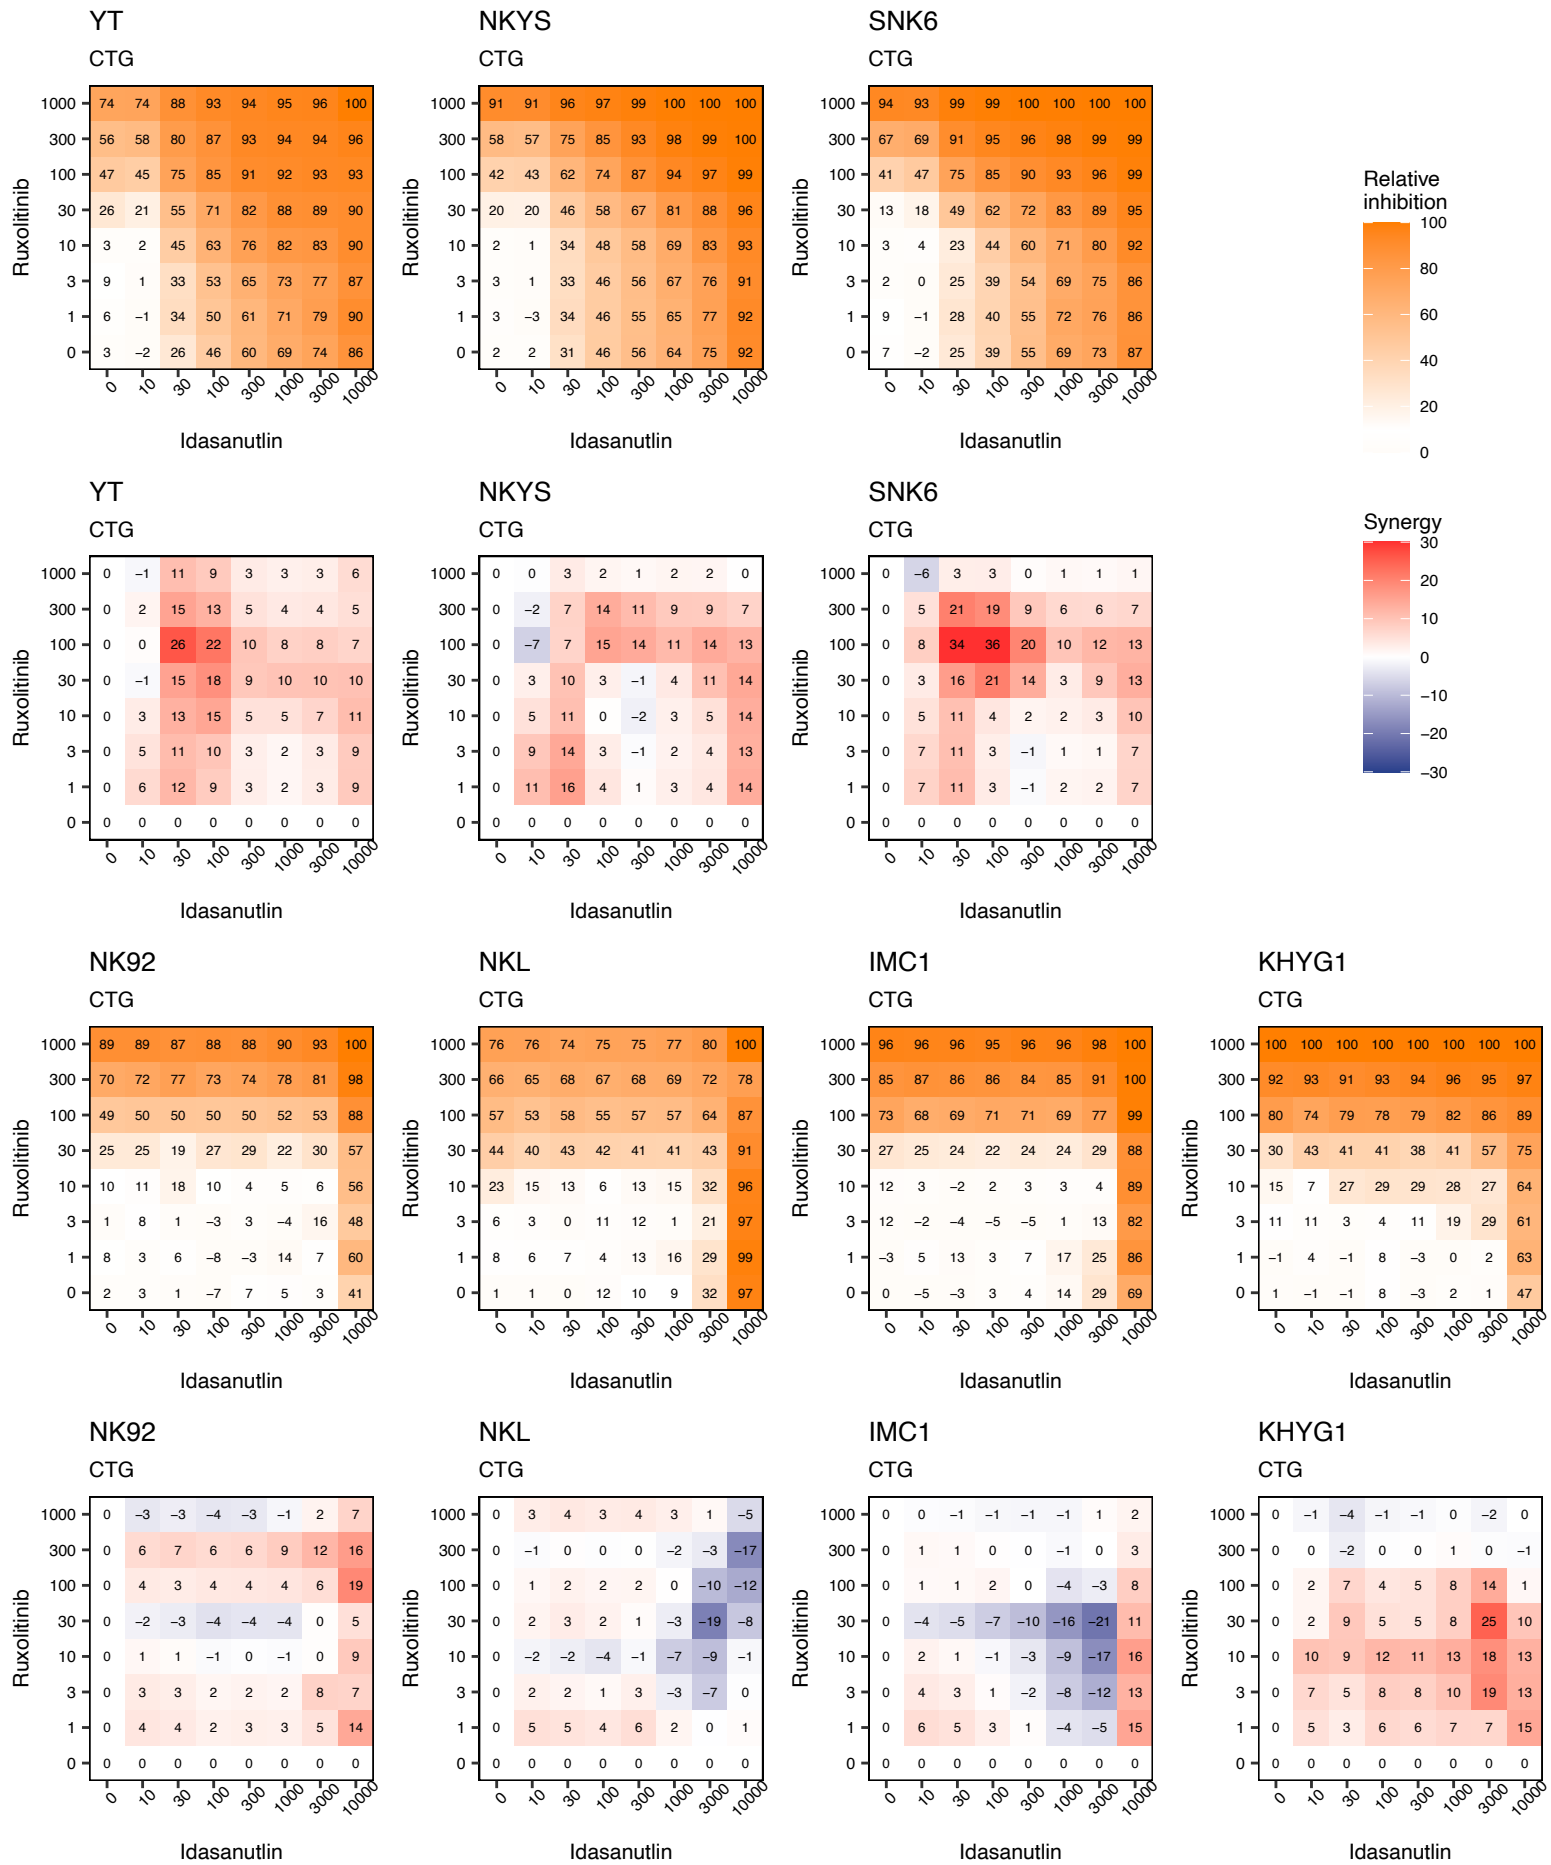

Cell lines: Relative inhibition (%) and synergy (ZIP) for idasanutlin and ruxolitinib based on toxicity readout

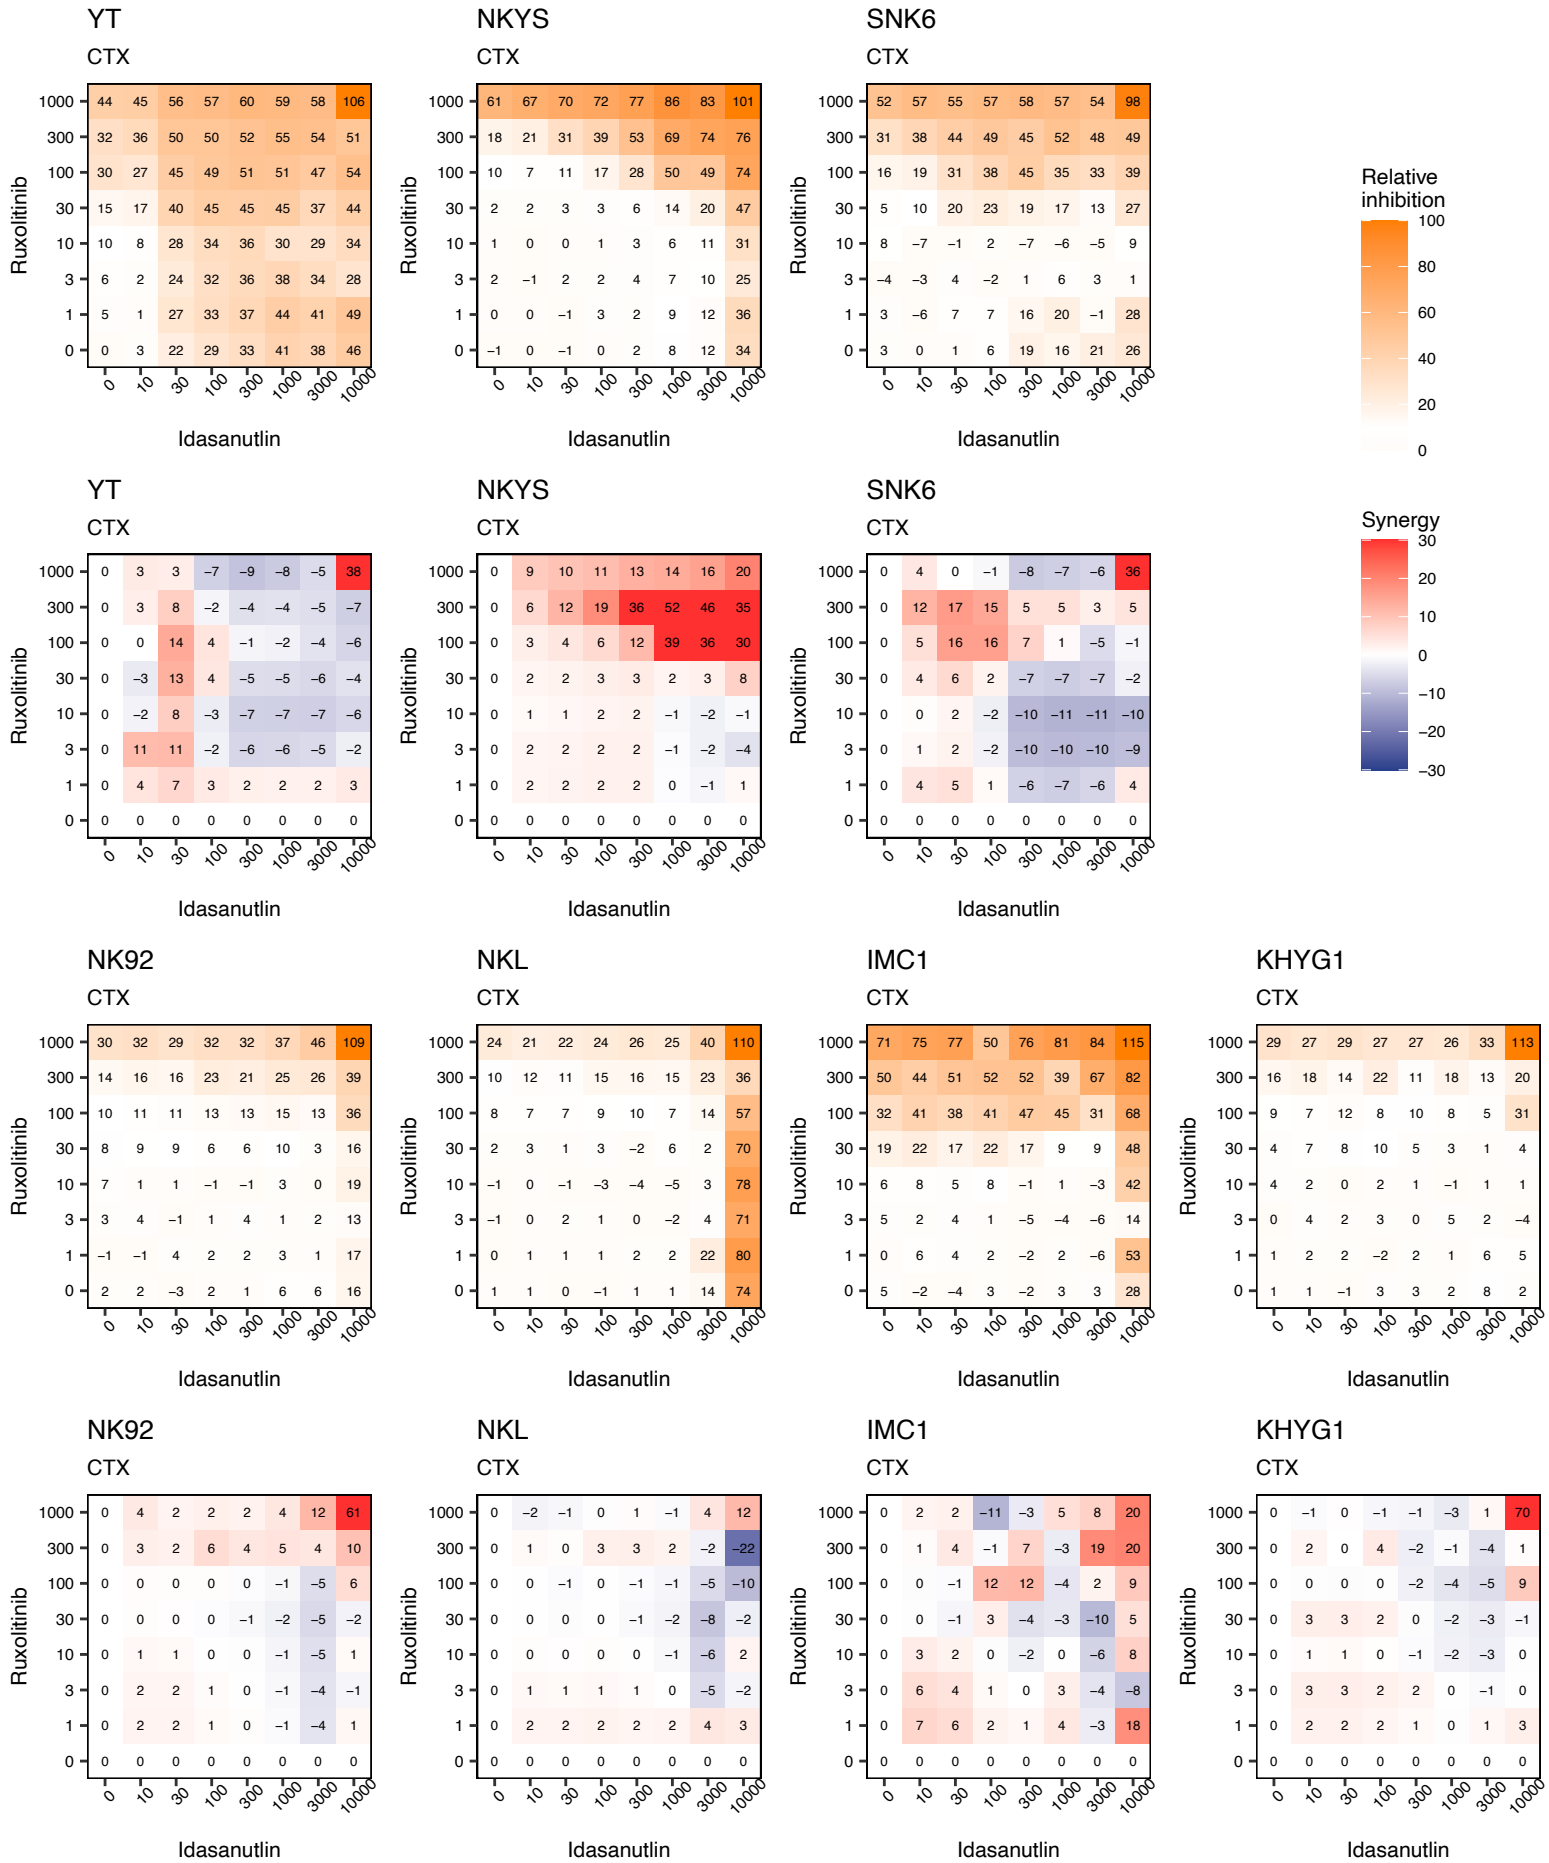

Cell lines: Relative inhibition (%) and synergy (ZIP) for siremadlin (HDM-201) and ruxolitinib based on viability readout

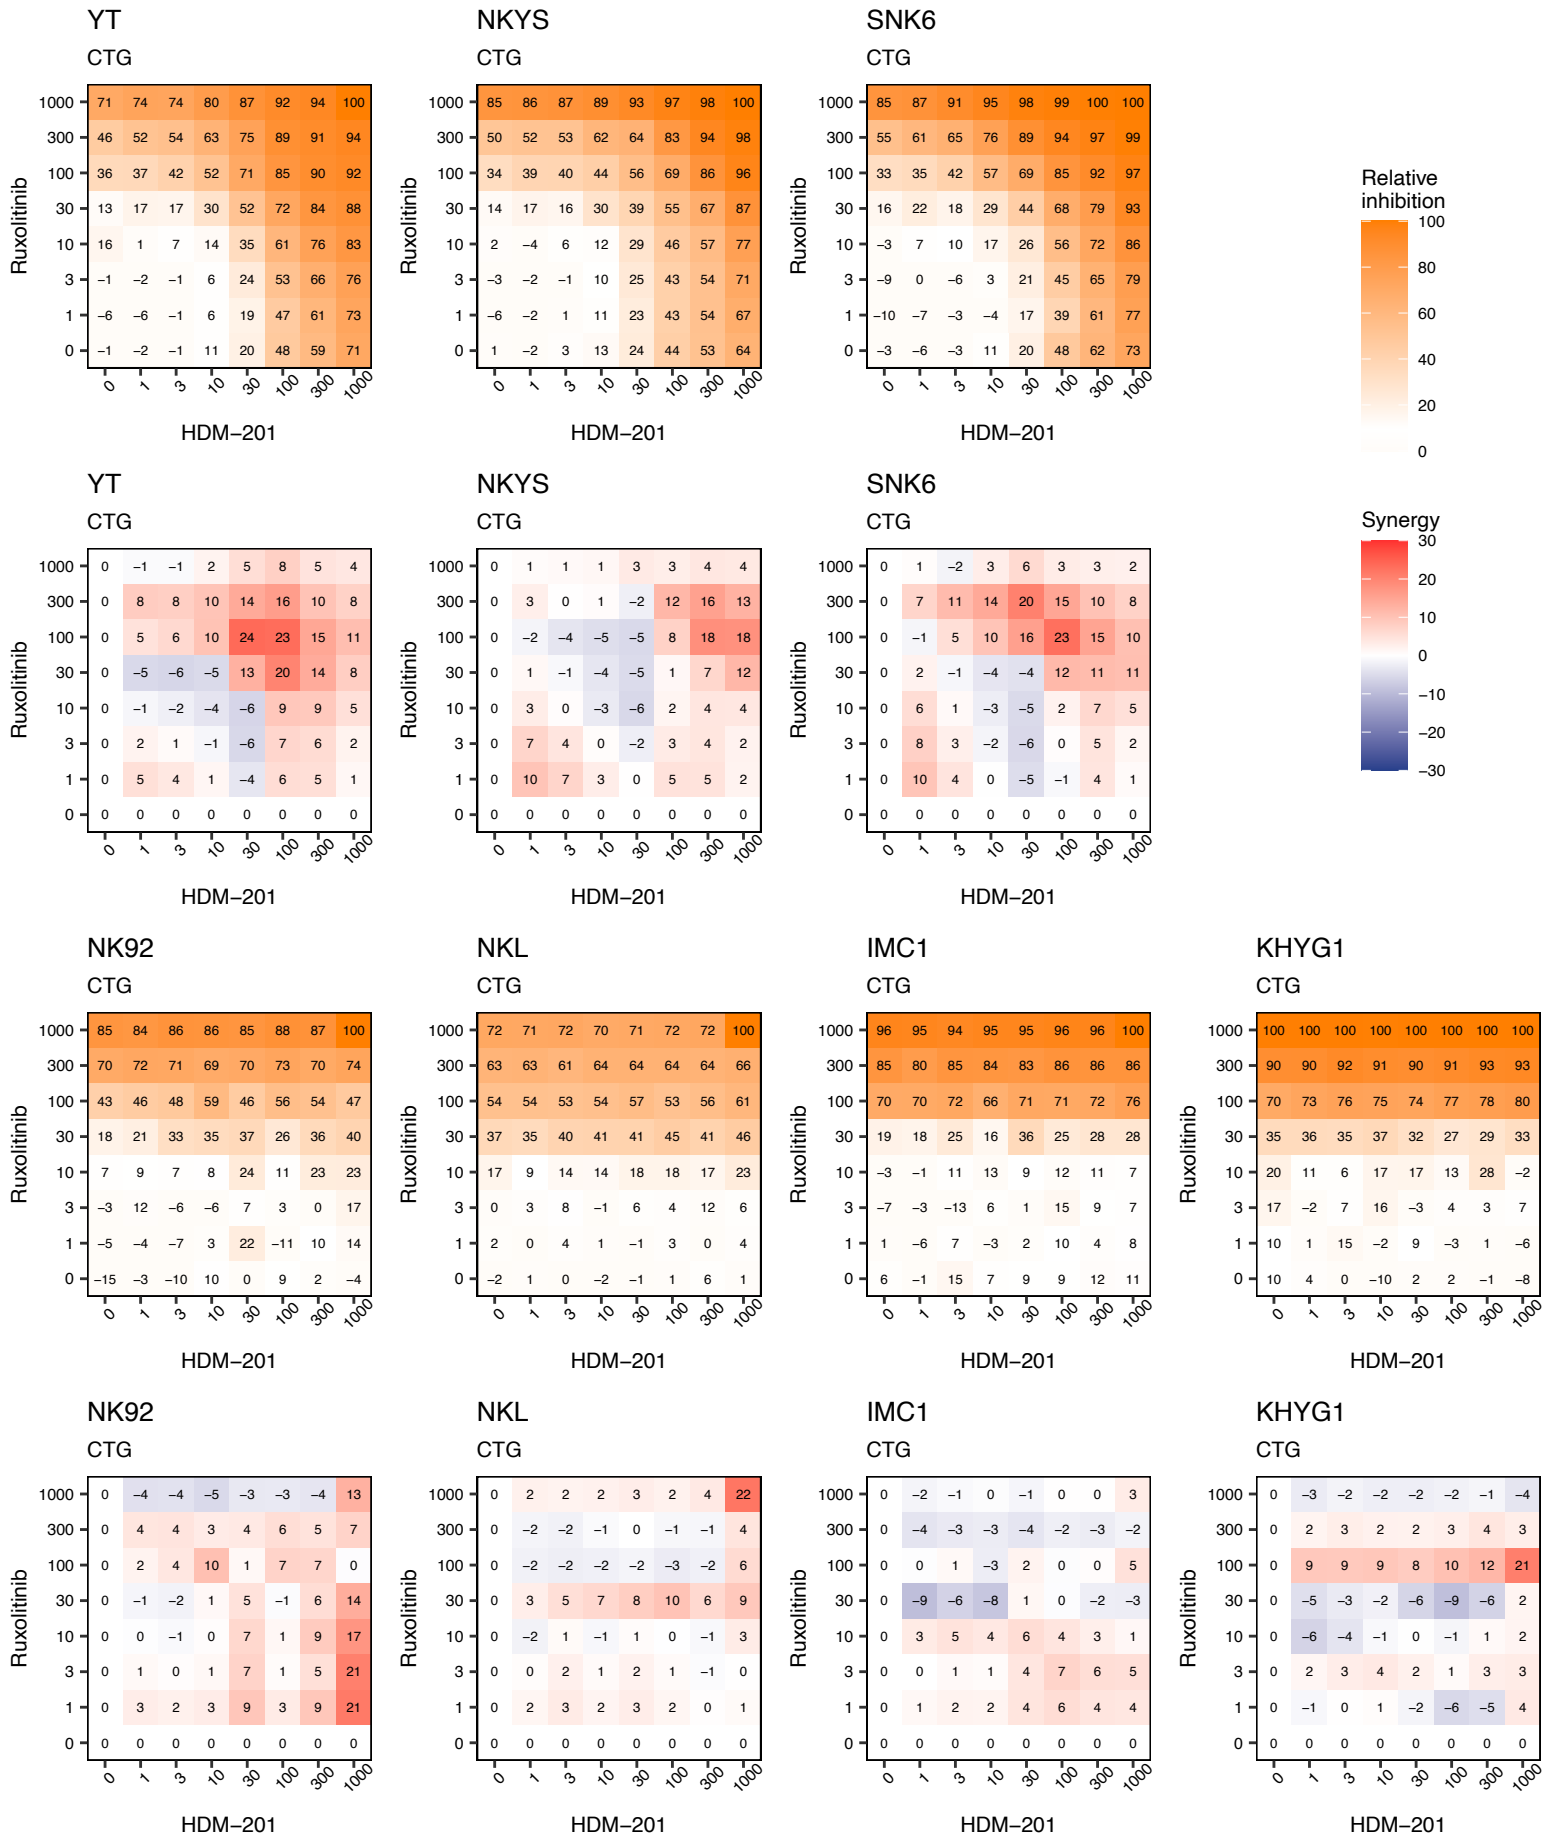

Cell lines: Relative inhibition (%) and synergy (ZIP) for siremadlin (HDM-201) and ruxolitinib based on toxicity readout

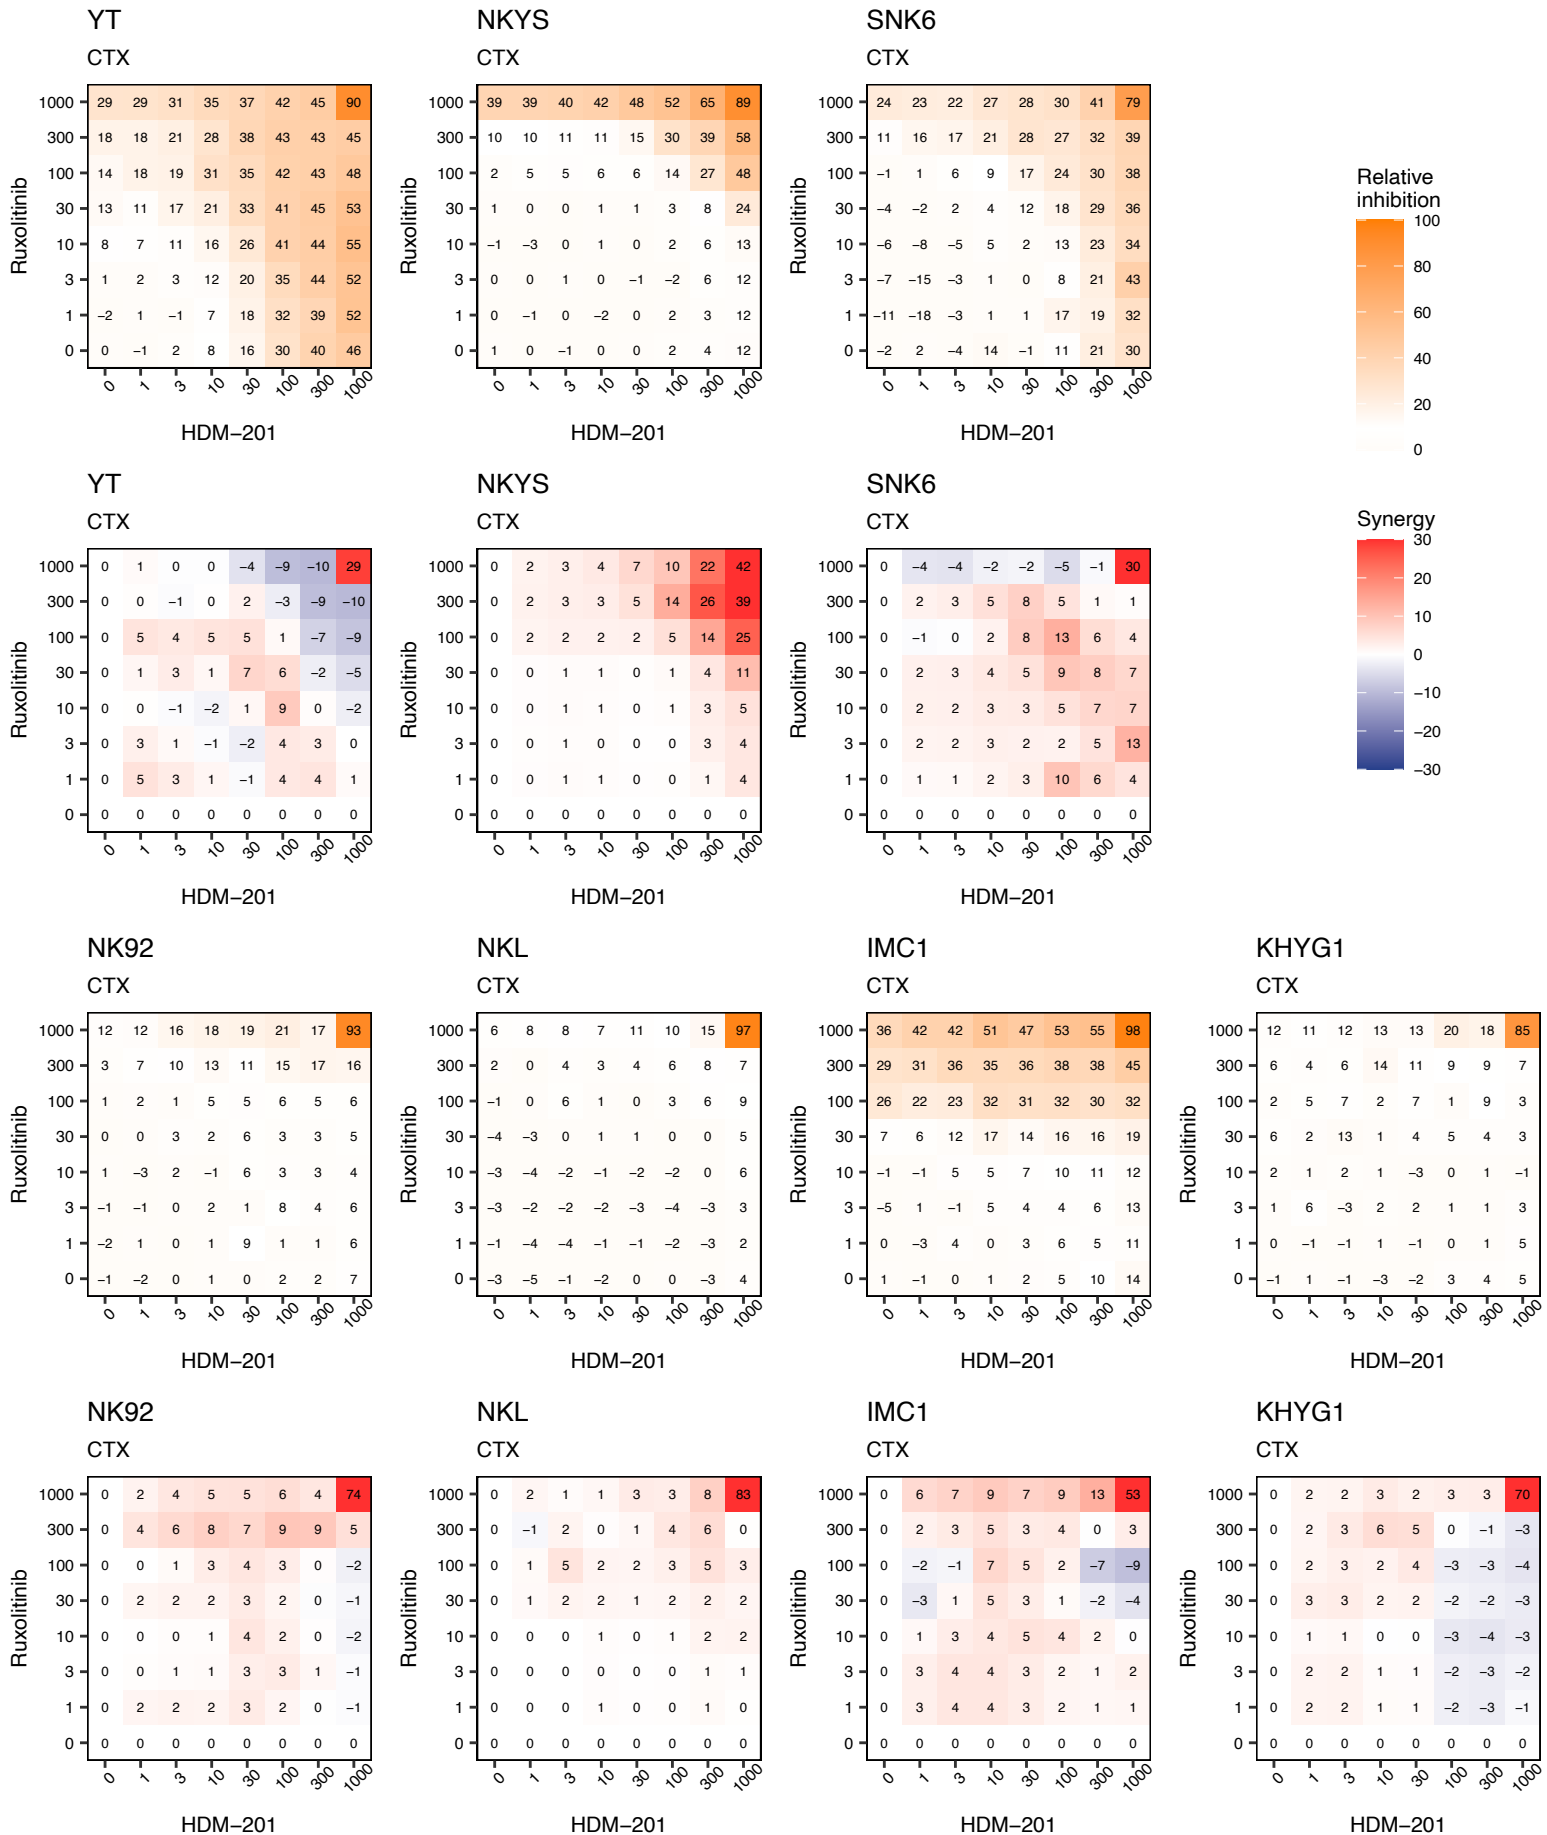

Cell lines: Relative inhibition (%) and synergy (ZIP) for tipifarnib and ruxolitinib based on viability readout

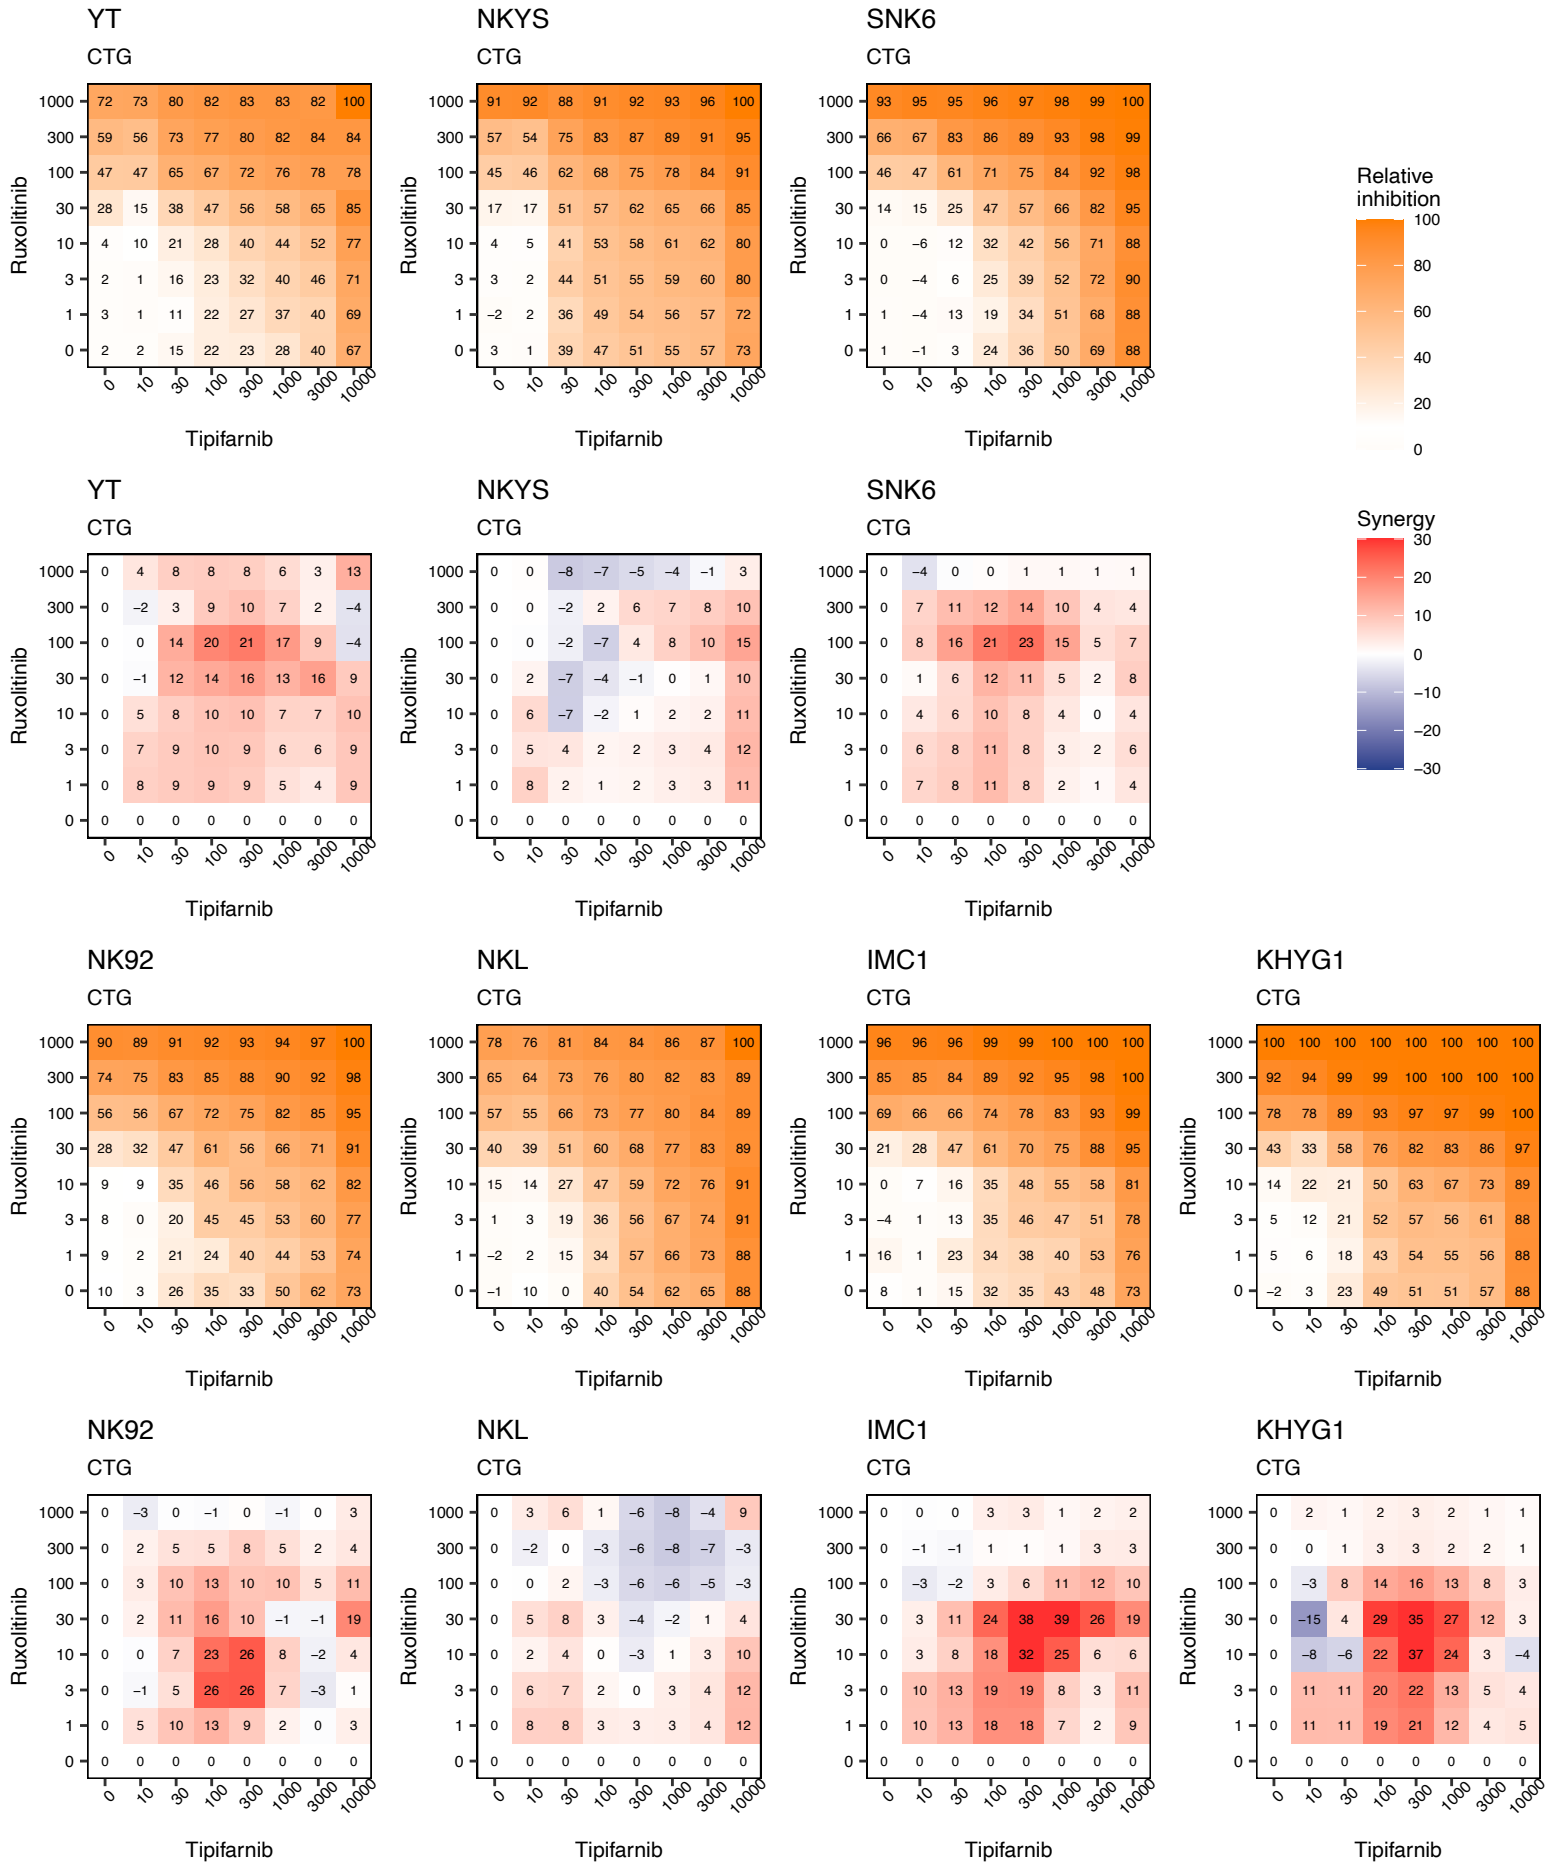



Cell lines: Relative inhibition (%) and synergy (ZIP) for tipifarnib and ruxolitinib based on toxicity readout

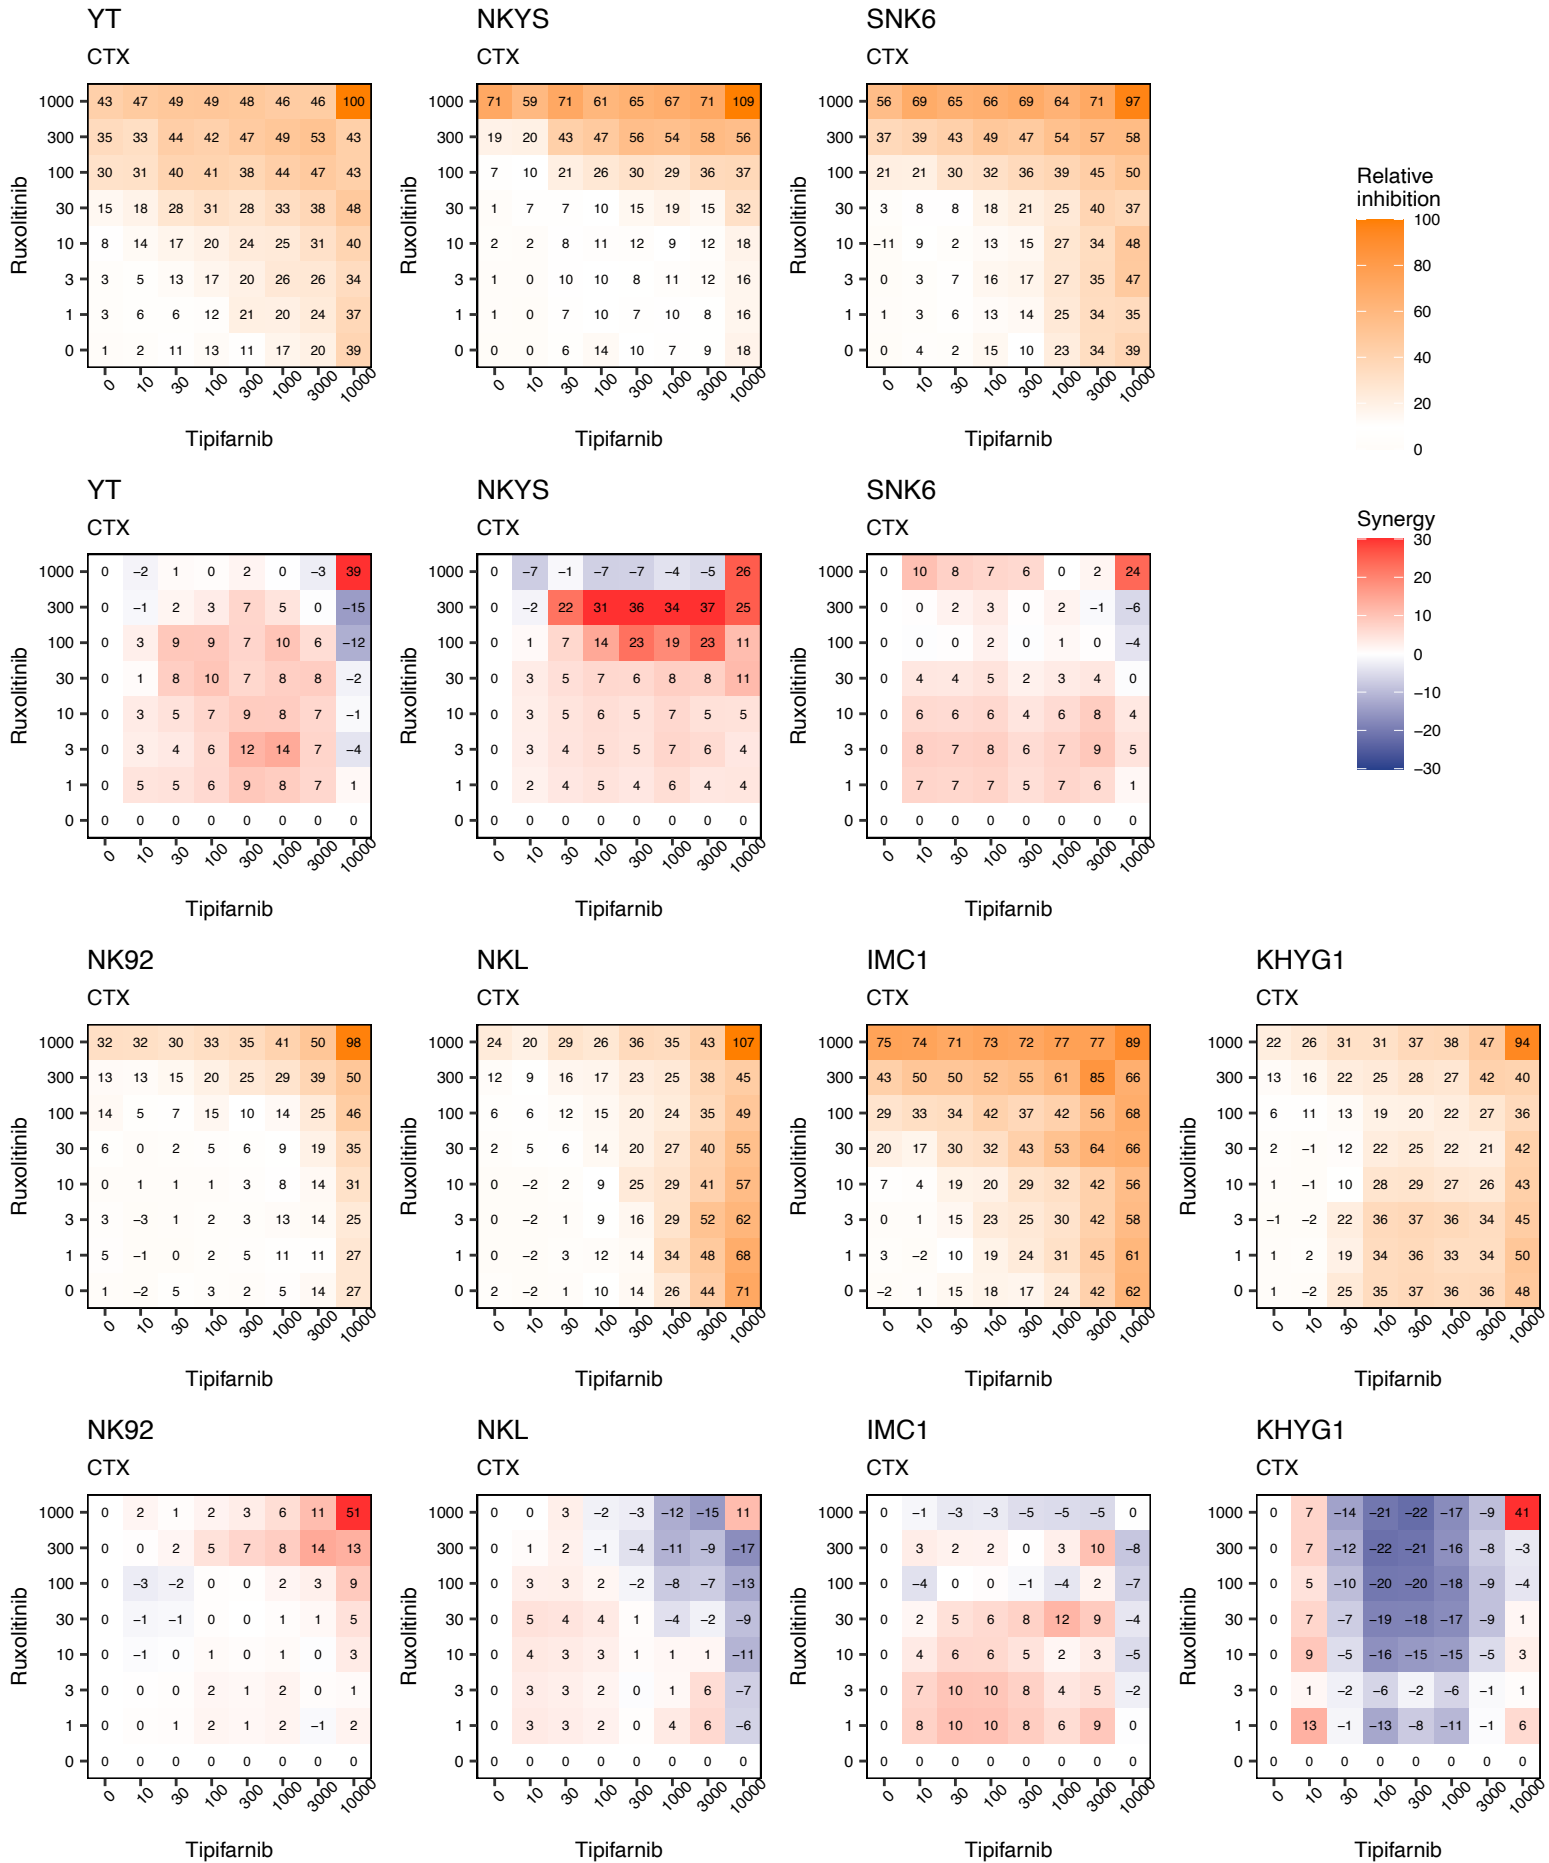

Cell lines: Relative inhibition (%) and synergy (ZIP) for lonafarnib and ruxolitinib based on viability readout

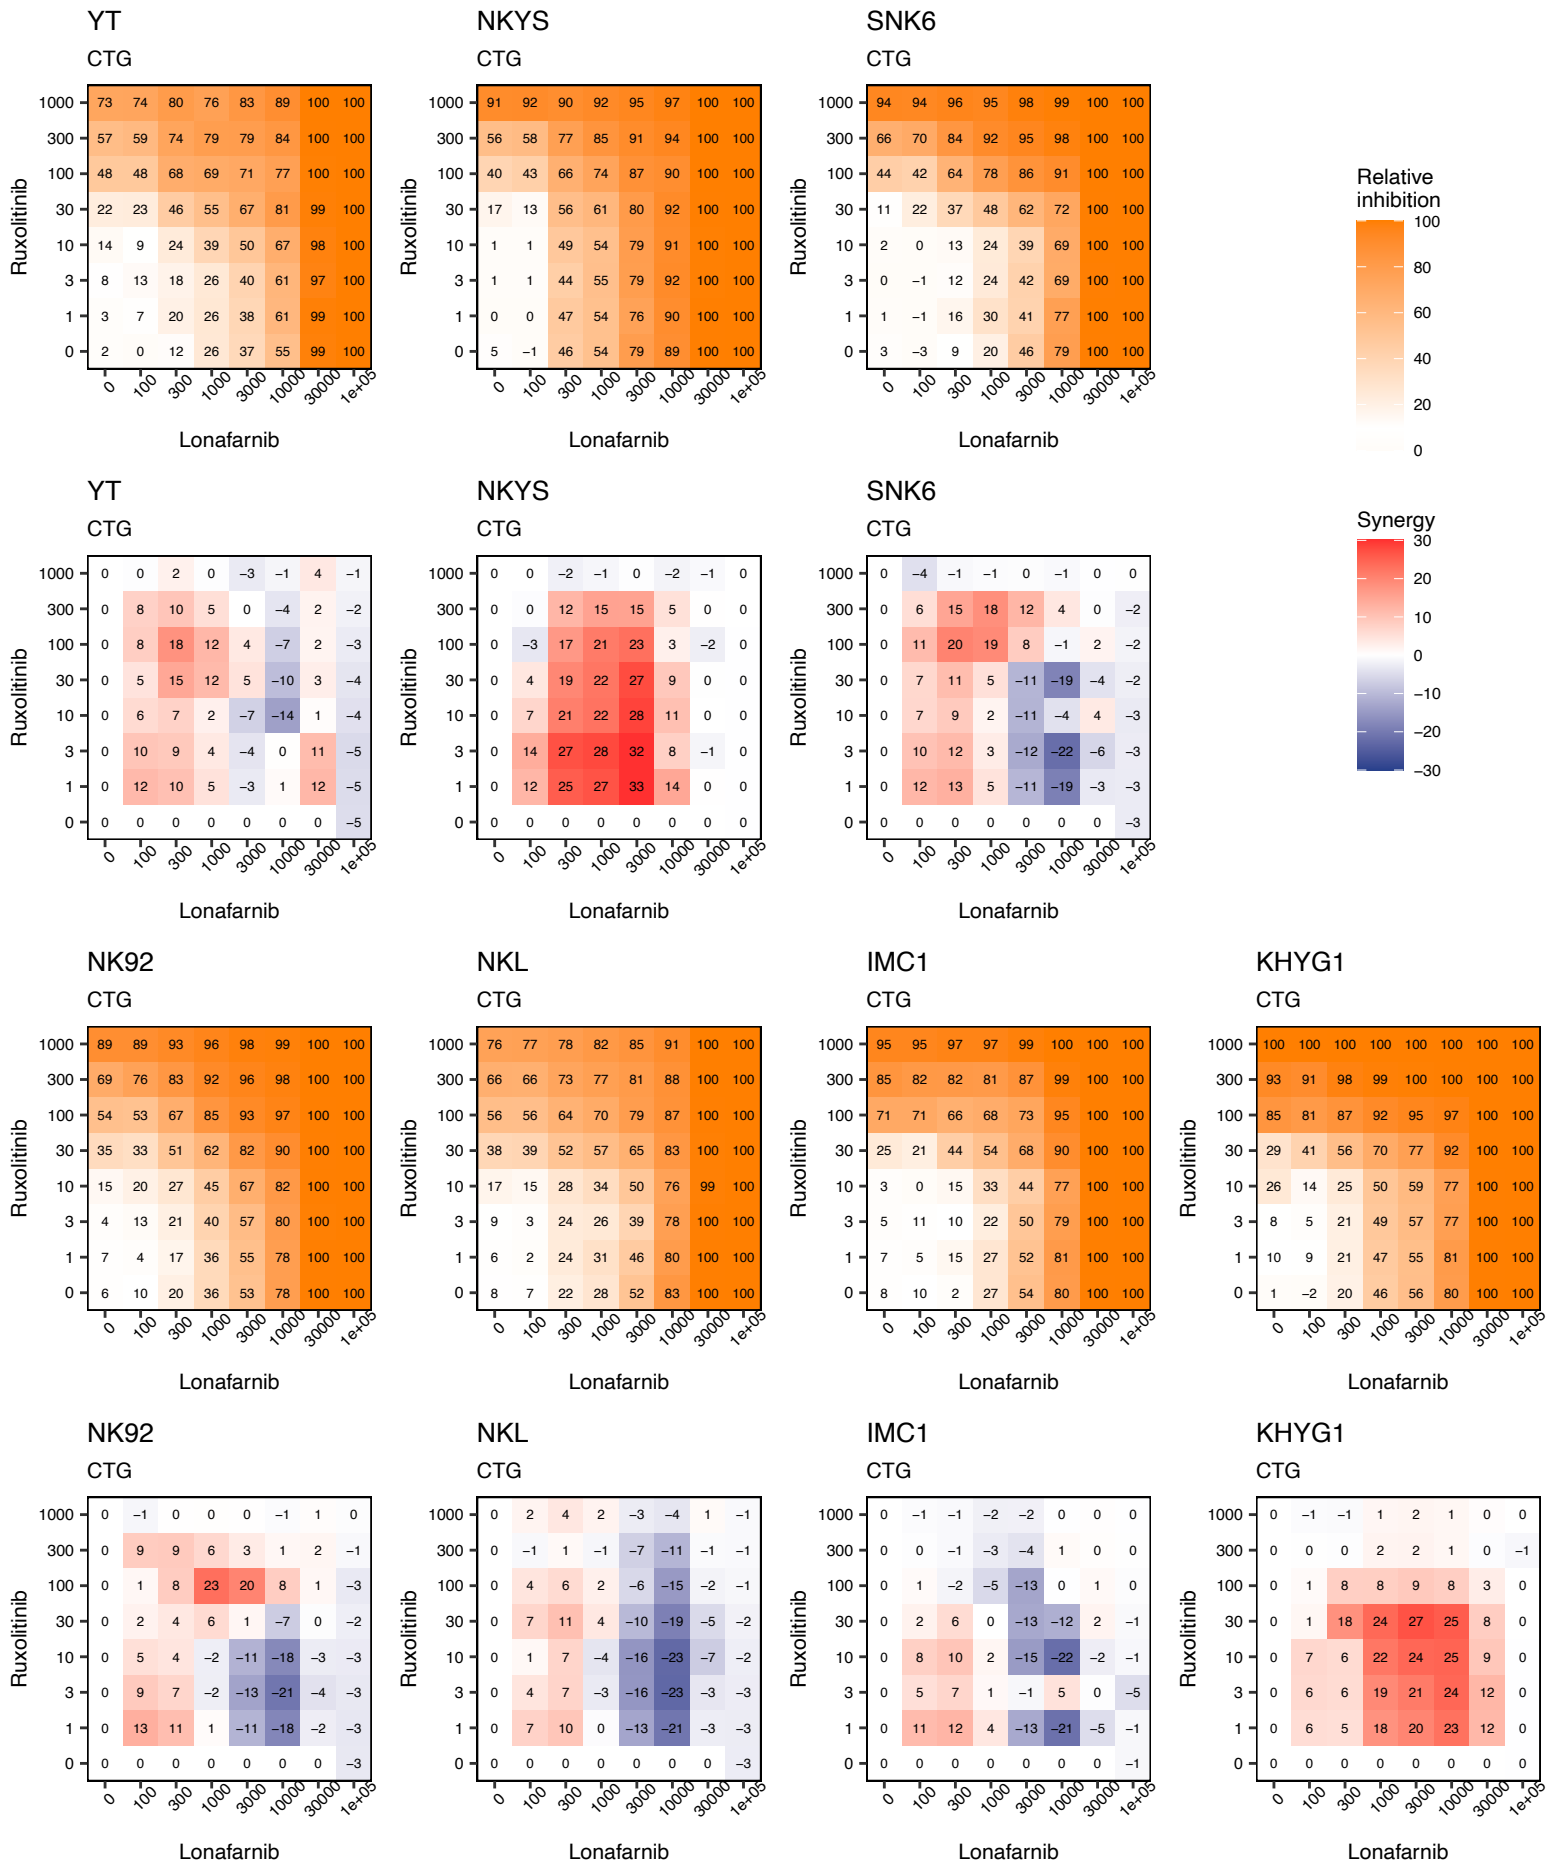

Cell lines: Relative inhibition (%) and synergy (ZIP) for lonafarnib and ruxolitinib based on toxicity readout

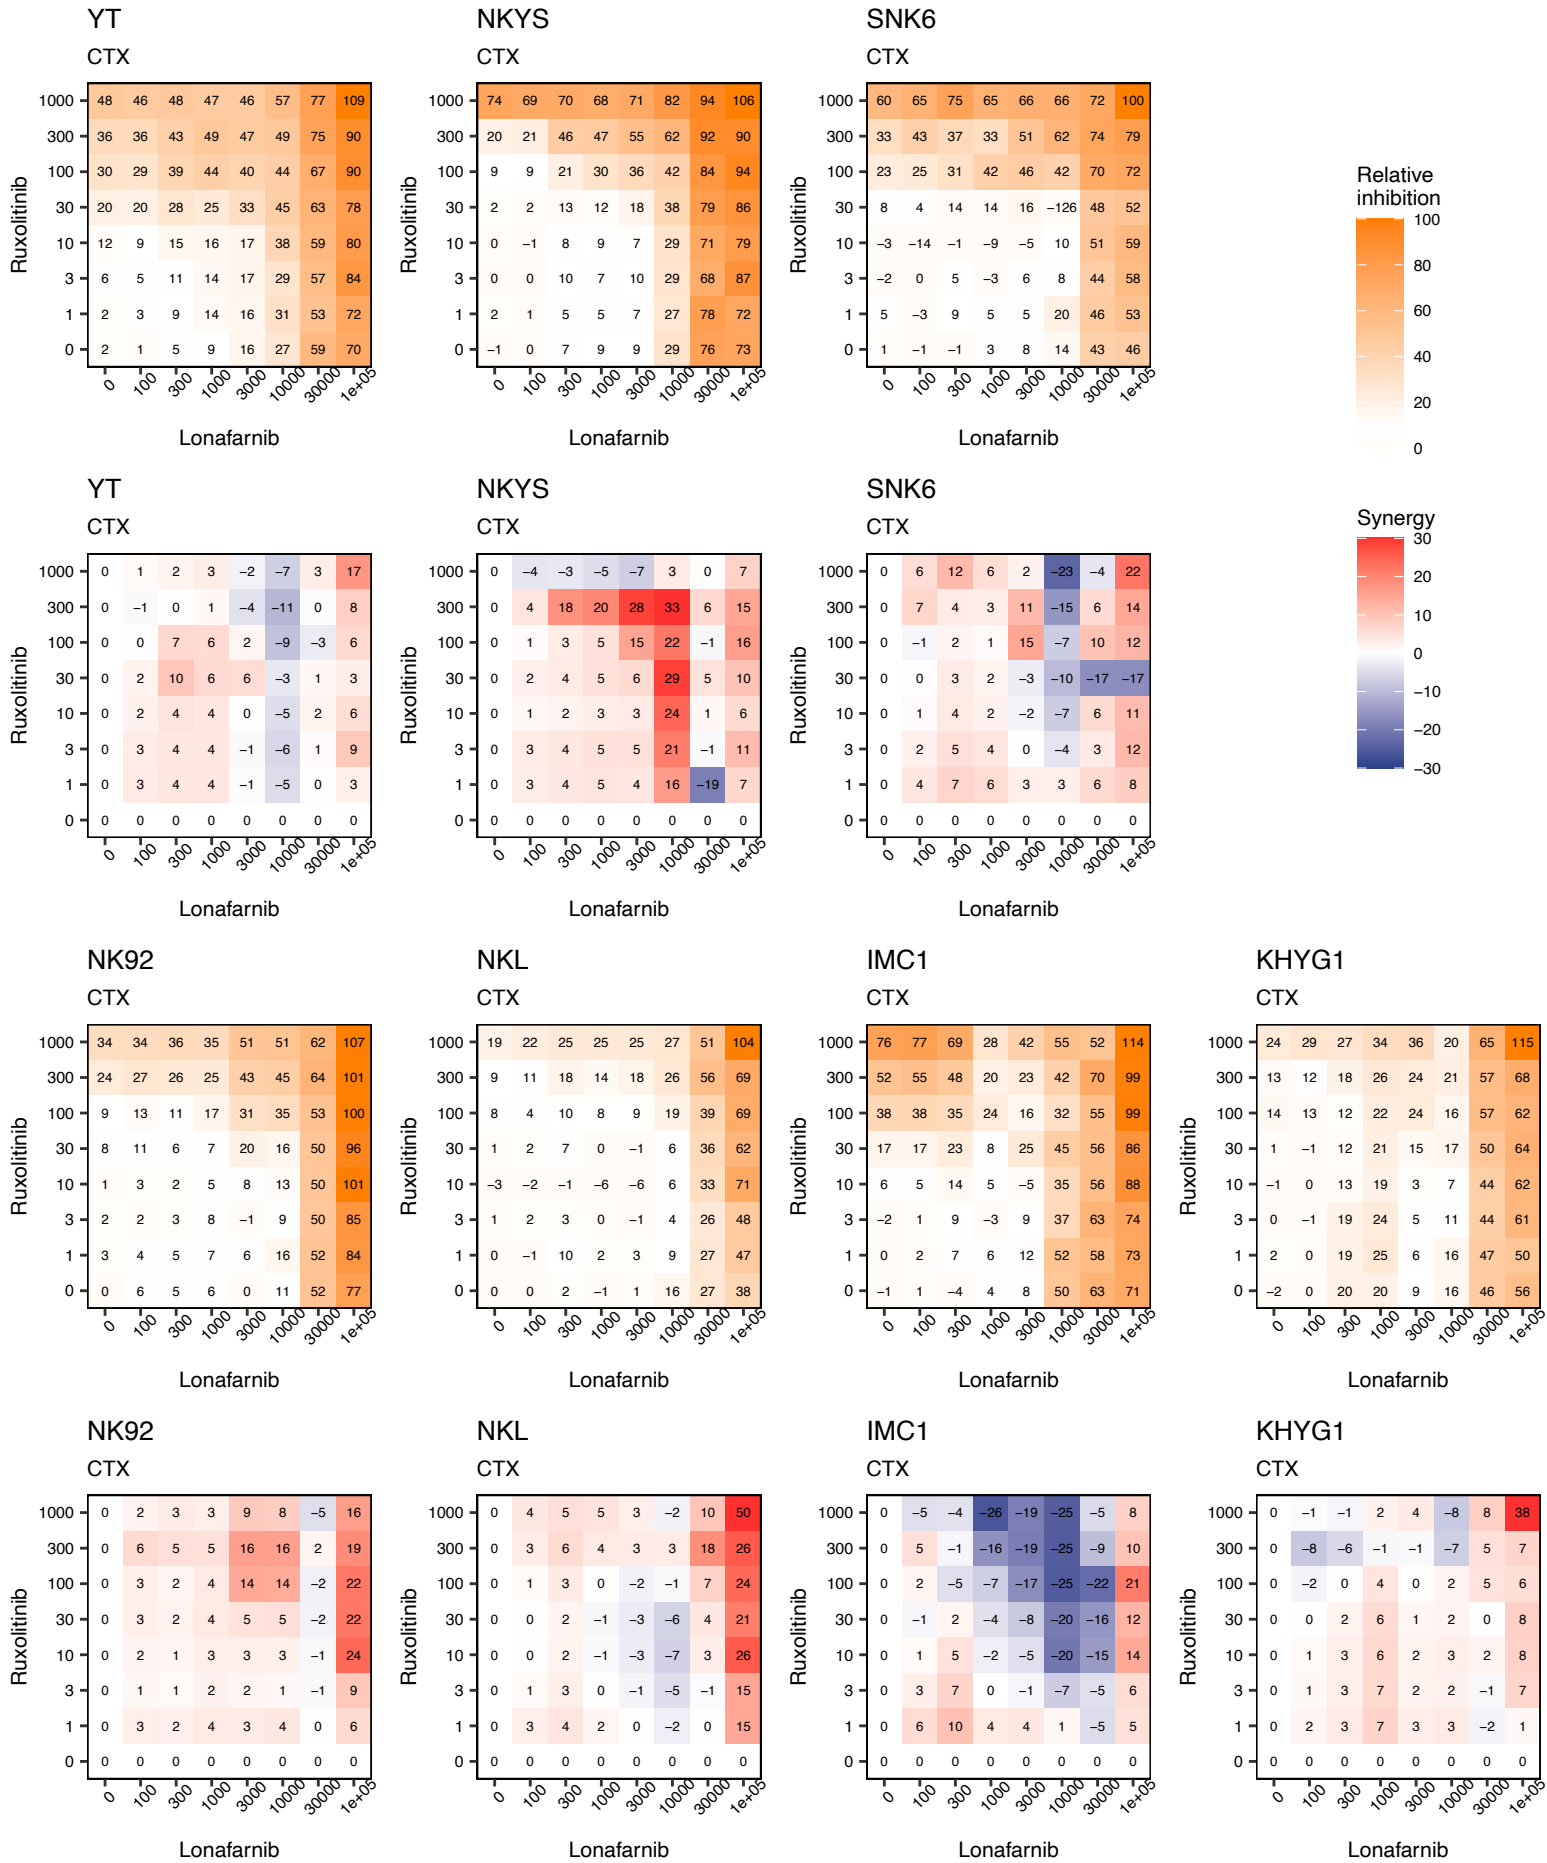

Healthy PBMCs: Relative inhibition (%) and synergy (ZIP) for dexamethasone and ruxolitinib based on viability readout

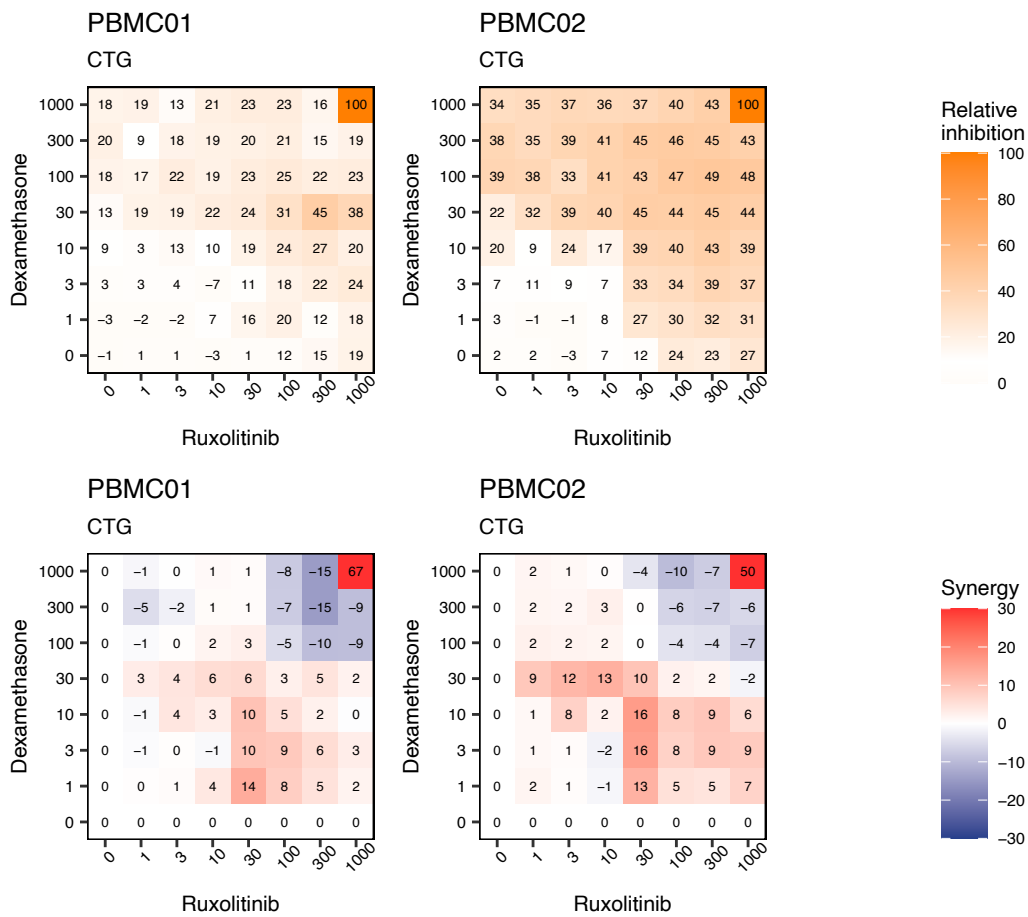

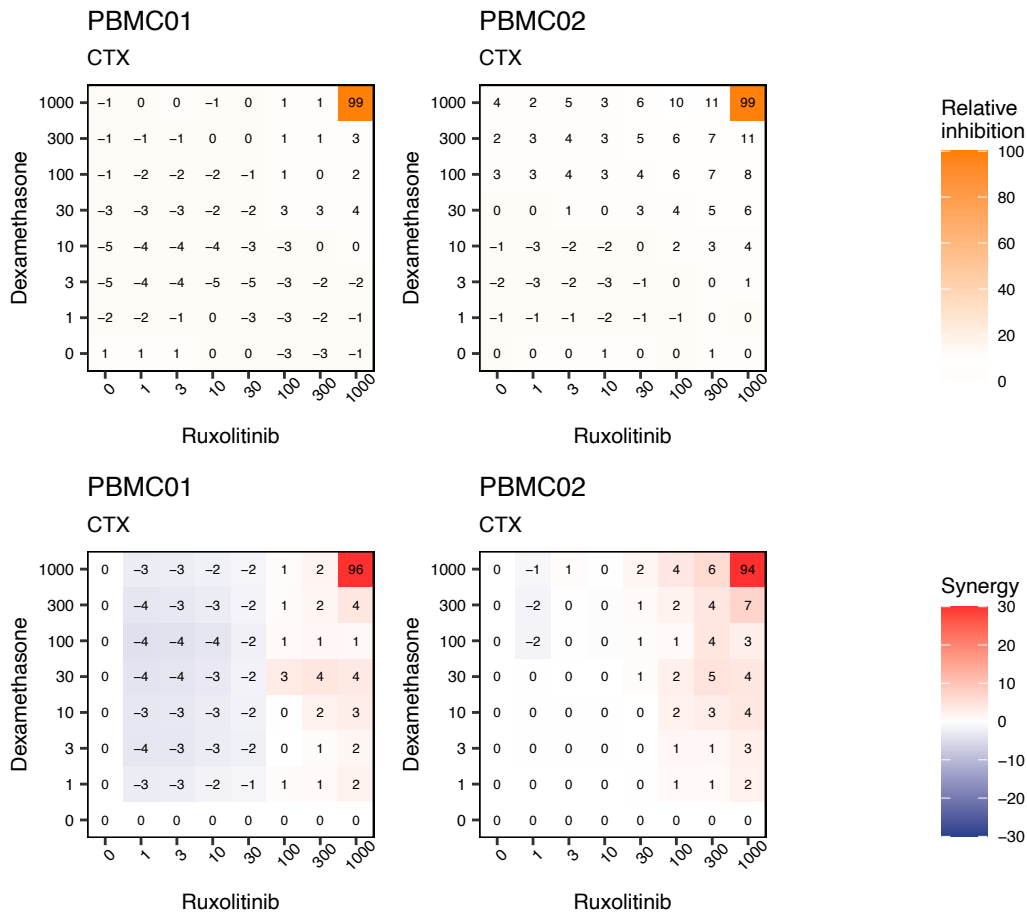

Healthy PBMCs: Relative inhibition (%) and synergy (ZIP) for tipifarnib and ruxolitinib based on viability readout

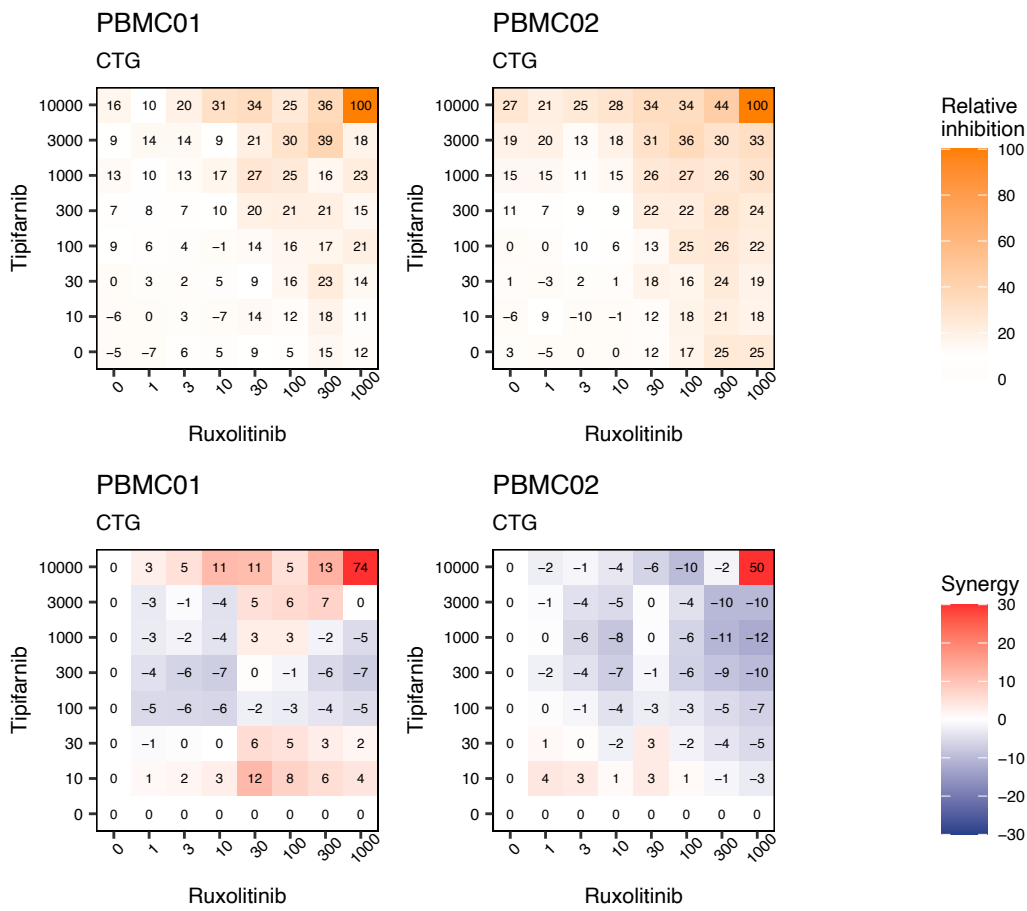

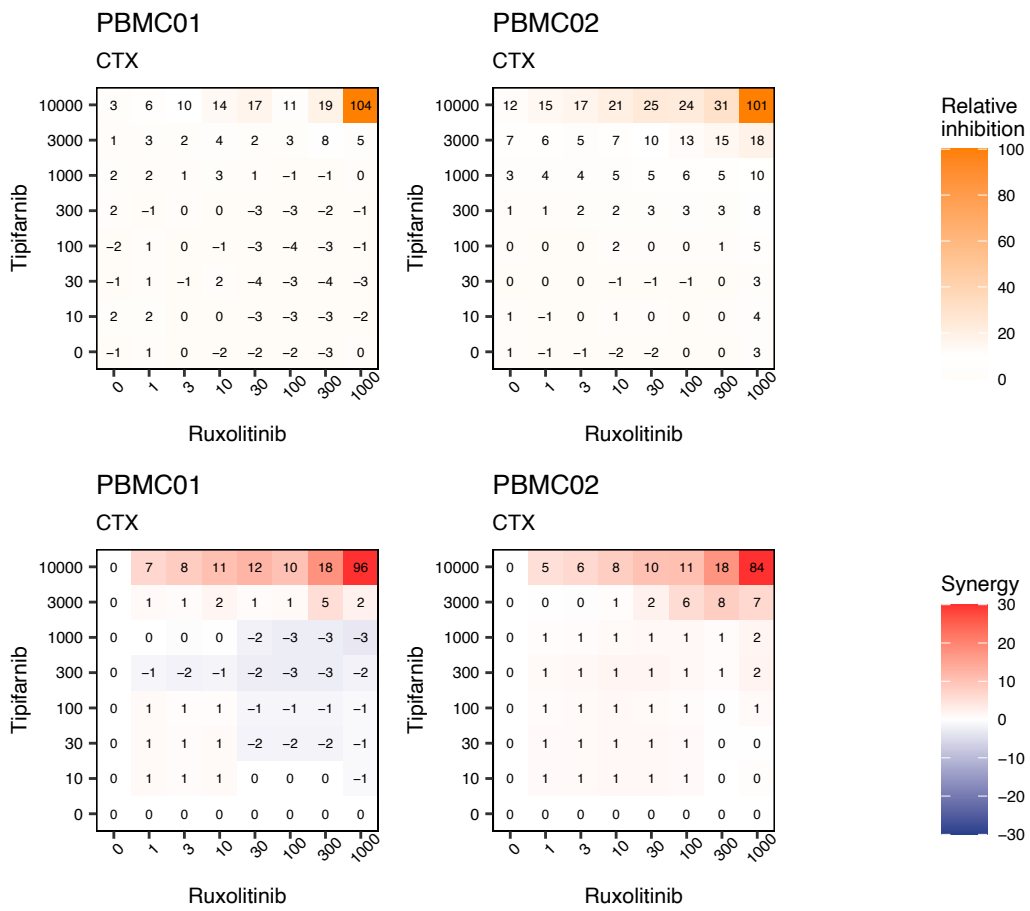

Healthy PBMCs: Relative inhibition (%) and synergy (ZIP) for S-63845 and ruxolitinib based on viability readout

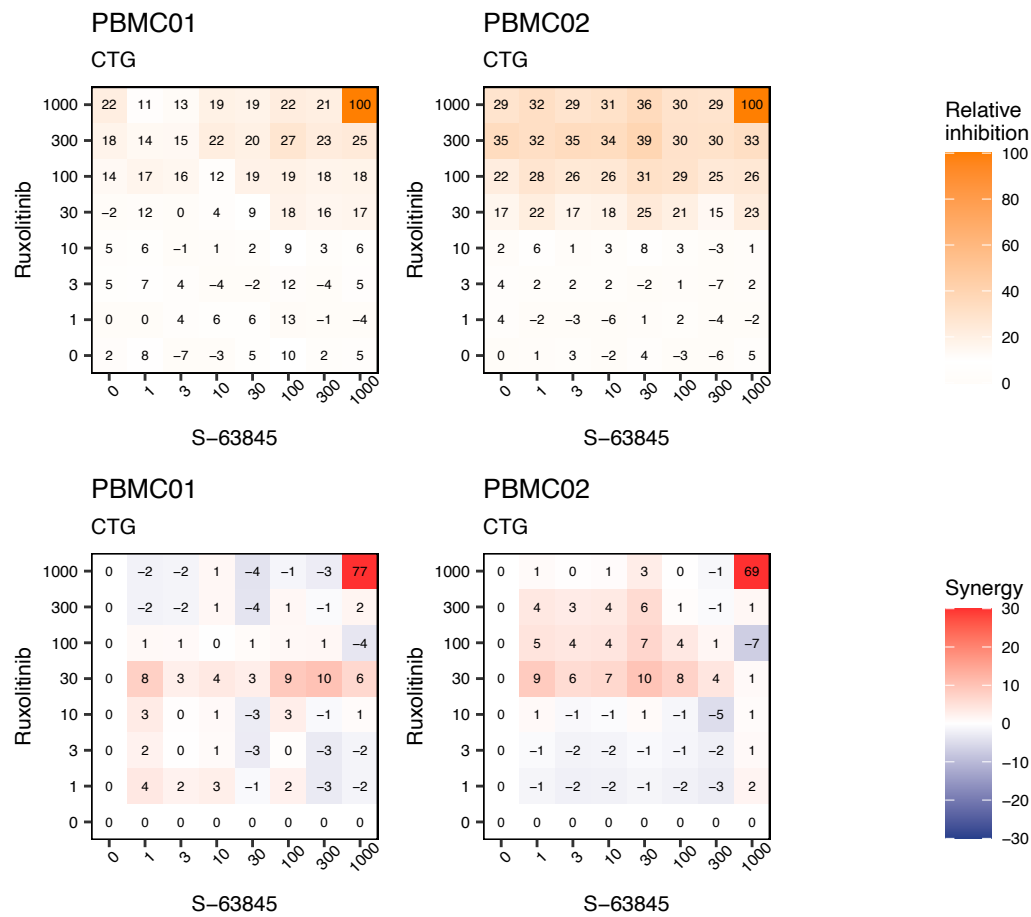



Healthy PBMCs: Relative inhibition (%) and synergy (ZIP) for S-63845 and ruxolitinib based on toxicity readout

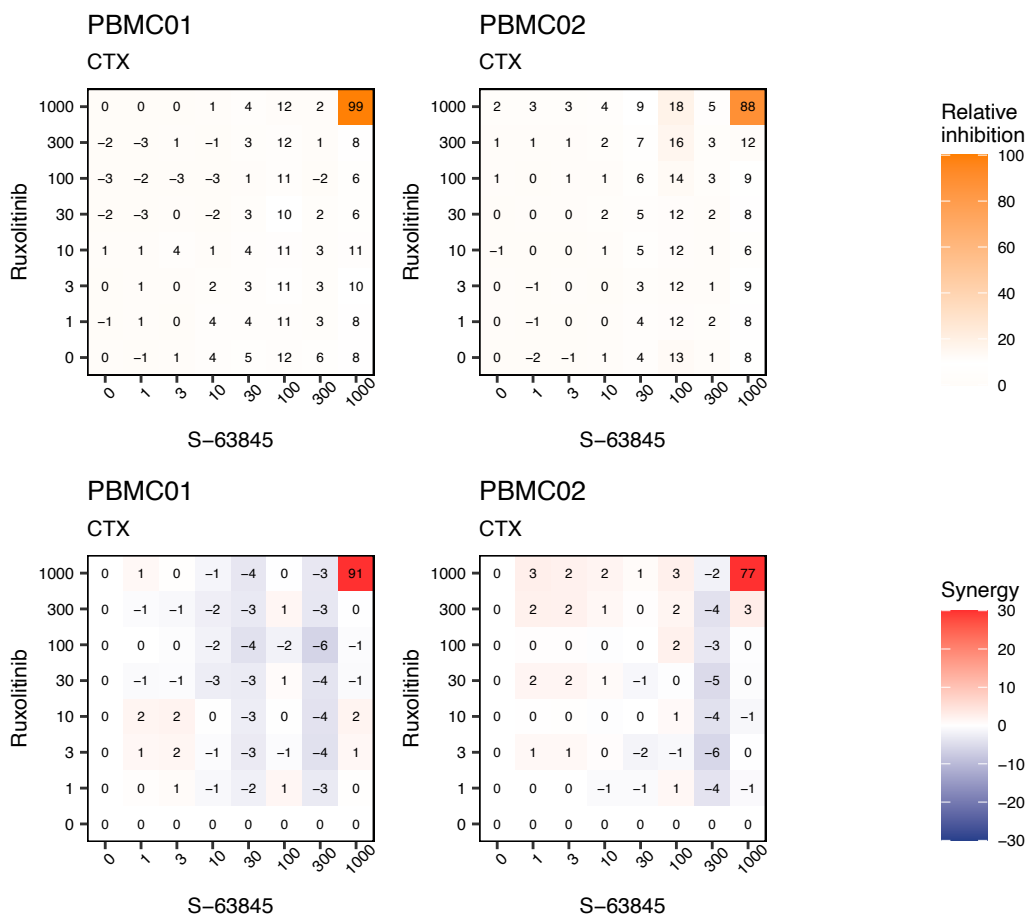

Healthy PBMCs: Relative inhibition (%) and synergy (ZIP) for idasanutlin and ruxolitinib based on viability readout

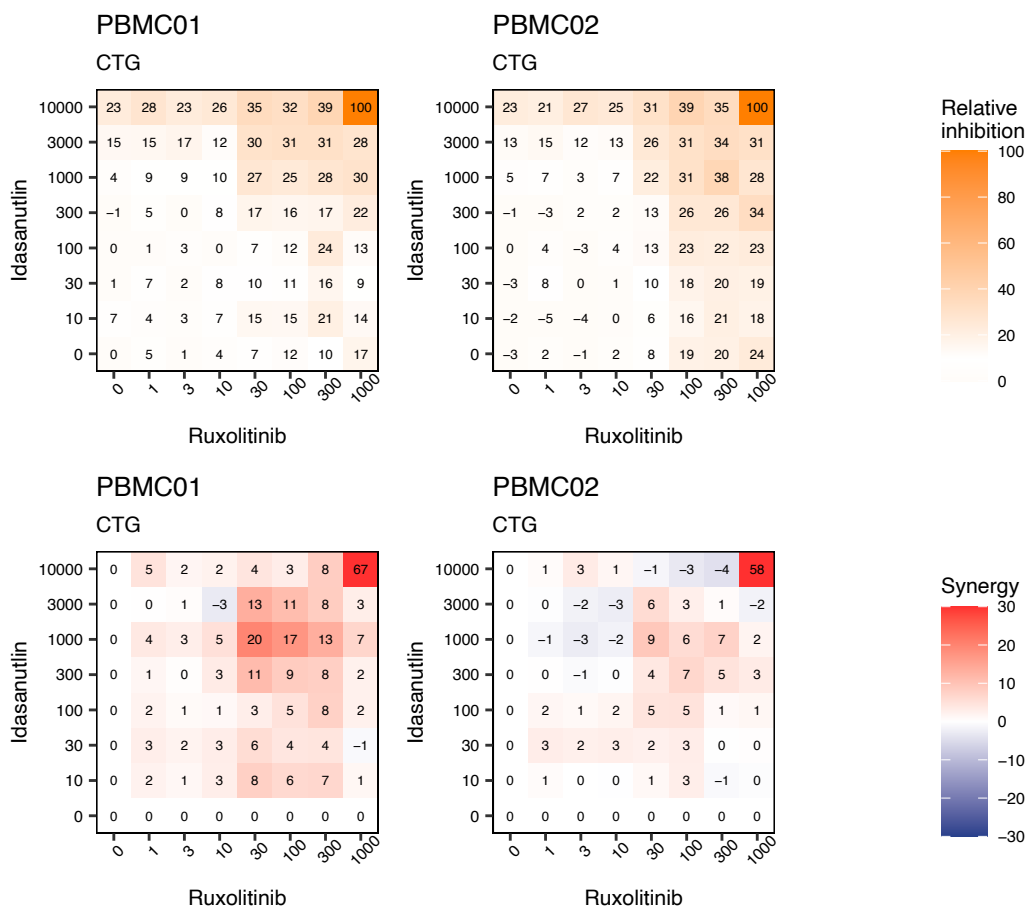

Healthy PBMCs: Relative inhibition (%) and synergy (ZIP) for idasanutlin and ruxolitinib based on toxicity readout

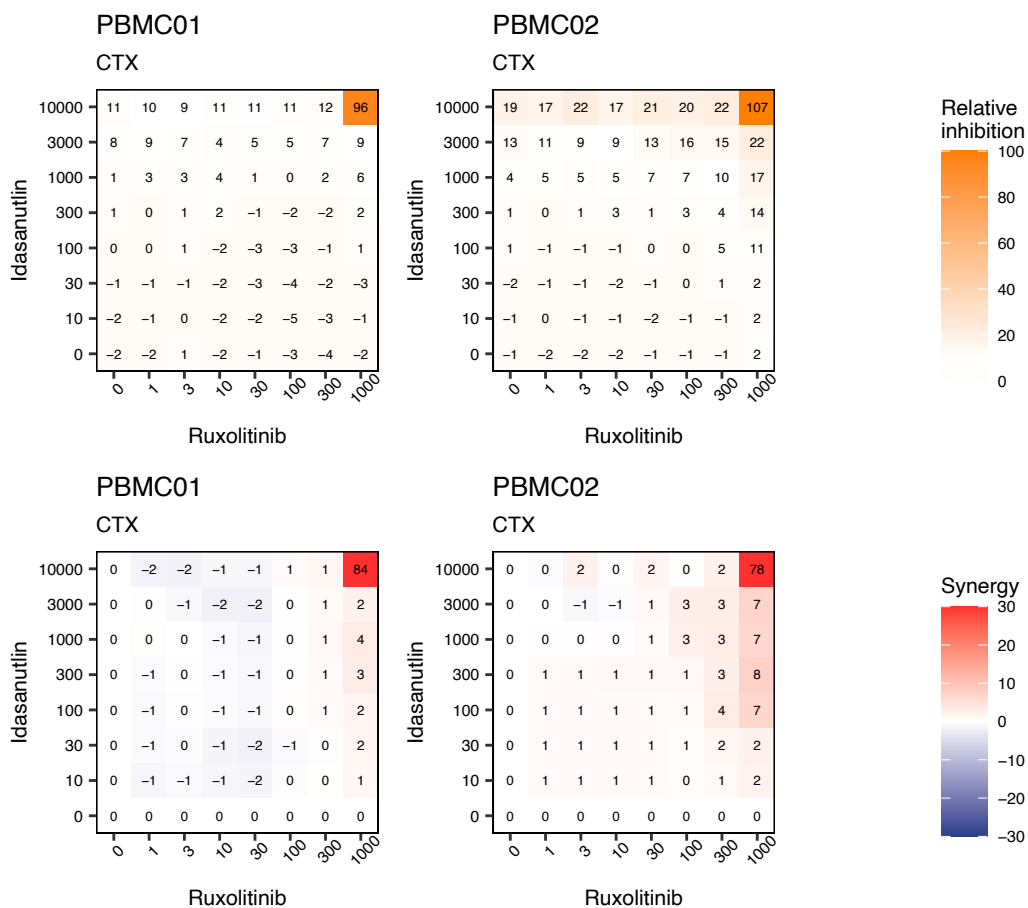

Supplement: advancesADV2020003300-suppl1.pdf [file advancesADV2020003300-suppl1.pdf]
