# Supplementary material
Source: PubMed Central journal article supplement (PMC8045497)
Supplement: advancesADV2020003300-suppl2.pdf [file advancesADV2020003300-suppl2.pdf]

## Supplemental material

### Selective drug combination vulnerabilities in *STAT3* and *TP53* mutant malignant NK-cells

#### Authors:

Elina Parri<sup>1</sup>, Heikki Kuusanmäki<sup>1,2</sup>, Daria Bulanova<sup>1,2</sup>, Satu Mustjoki<sup>3</sup> and Krister Wennerberg<sup>1,2</sup>

#### Affiliations:

<sup>1</sup> Institute for Molecular Medicine Finland, Helsinki Institute of Life Science, University of Helsinki, Helsinki, Finland

<sup>2</sup> Biotech Research & Innovation Centre (BRIC) and Novo Nordisk Foundation Center for Stem Cell Biology (DanStem), University of Copenhagen, Copenhagen, Denmark

<sup>3</sup> Hematology Research Unit Helsinki, Helsinki University Hospital Comprehensive Cancer Center, Helsinki, Finland and Translational Immunology Research Program and Department of Clinical Chemistry and Hematology, University of Helsinki, Helsinki, Finland

## **Table of Contents**

### **Supplemental material**

#### **Supplemental Tables**

Table S1. Cell numbers in 3-day drug screens and 9-day extended assays.

Table S2. Antibodies, buffers and concentrations used in flow cytometry assay.

Table S3. ZIP synergy scores for NK-cell lines and PBMCs.

#### **Supplemental Figures**

Figure S1. BCL2 homology domain 3 (BH3) profiling.

Figure S2. Extended drug response assays: 9-day treatment and 3-day treatment, 6-day recovery assay.

Figure S3. Time-to-progression assay graphs for ruxolitinib combined with dexamethasone or S63845.

Figure S4. Comparison of top drug combination responses on NK-cell lines and PBMCs.

Figure S5. Effect of dexamethasone or S63845 combined with ruxolitinib on healthy PBMC populations.

#### **Supplemental Materials and Methods**

#### **Supplemental References**

## Supplemental Tables

**Table S1. Cell numbers in 3-day drug screens and 9-day extended assays.**

| Cell line and reference / PBMC | STAT3/TP53 mutation <sup>1</sup> | Exonic function <sup>1</sup> | Original disease                          | Cell line established | EBV status | 3-day assays, 384-well plate (cells/ml) | 3-day assays, 384-well plate (cells/well) | 9-day assays, 96-well plate (cells/ml) | 9-day assays, 96-well plate (cells/well) | IL-2 concentration in growth media (ng/ml) |
|--------------------------------|----------------------------------|------------------------------|-------------------------------------------|-----------------------|------------|-----------------------------------------|-------------------------------------------|----------------------------------------|------------------------------------------|--------------------------------------------|
| <b>NKL</b> <sup>2,3</sup>      | Intronic splicing TP53 mutation  | NA                           | NK-LGL                                    | 1996                  | Negative   | 150000                                  | 3000                                      | 25000                                  | 2000                                     | 10                                         |
| <b>NK-92</b> <sup>3,4</sup>    | TP53(E326X)                      | stopgain                     | ANKL                                      | 1992                  | Positive   | 150000                                  | 3000                                      | 50000                                  | 4000                                     | 10                                         |
| <b>IMC-1</b> <sup>5</sup>      | TP53(L344P)<br>TP53(V157F)       | nonsynonymous SNV            | ANKL                                      | 2004                  | Negative   | 200000                                  | 4000                                      | 18750 or 25000                         | 1500 or 2000                             | 20                                         |
| <b>KHYG-1</b> <sup>3,6</sup>   | TP53(R248W)                      | nonsynonymous SNV            | ANKL                                      | 1997                  | Negative   | 200000                                  | 4000                                      | NA                                     | NA                                       | 10                                         |
| <b>NK-YS</b> <sup>3,7</sup>    | STAT3(Y640F)                     | nonsynonymous SNV            | NKTCL                                     | 1996                  | Positive   | 100000                                  | 2000                                      | 18750 or 25000                         | 1500 or 2000                             | 10                                         |
| <b>YT</b> <sup>3,8,9</sup>     | STAT3(Y640F)                     | nonsynonymous SNV            | Acute lymphoblastic lymphoma with thymoma | 1983                  | Positive   | 200000                                  | 4000                                      | 50000                                  | 4000                                     | 10                                         |
| <b>SNK-6</b> <sup>10</sup>     | STAT3(D661Y)                     | nonsynonymous SNV            | NKTCL                                     | 2001                  | Positive   | 200000                                  | 4000                                      | 50000                                  | 4000                                     | 10                                         |
| <b>Healthy PBMC</b>            | NA                               | NA                           | NA                                        | NA                    | NA         | 500000                                  | 10000                                     | NA                                     | NA                                       | 10                                         |

Abbreviations used in table:

NK-LGL = NK-cell large granular lymphocytic leukemia

ANKL = Aggressive NK-cell leukemia

NKTCL = Natural-killer/T cell lymphoma

EBV = Epstein-Barr virus

NA = not applicable

**Table S2. Antibodies, buffers and concentrations used in flow cytometry assay.**

| <b>Antibody</b>              | <b>Clone</b> | <b>Dilution</b> | <b>Vendor</b>  | <b>Buffer</b>                                                | <b>Mix</b>                                 |
|------------------------------|--------------|-----------------|----------------|--------------------------------------------------------------|--------------------------------------------|
| CD14 (FITC)                  | MφP9         | 1:100           | BD Biosciences | staining buffer (10% FBS and 0.02% NaN3 in RPMI-1640 medium) | Antibody mix                               |
| CD56 (PE-Vio770)             | ICRF44       | 1:100           | BD Biosciences | staining buffer (10% FBS and 0.02% NaN3 in RPMI-1640 medium) | Antibody mix                               |
| CD3 (APC)                    | 8G12         | 1:100           | BD Biosciences | staining buffer (10% FBS and 0.02% NaN3 in RPMI-1640 medium) | Antibody mix                               |
| CD33 (BV421)                 | HIT2         | 1:500           | BD Biosciences | staining buffer (10% FBS and 0.02% NaN3 in RPMI-1640 medium) | Antibody mix                               |
| CD19 (BV510)                 | 104D2        | 1:100           | BD Biosciences | staining buffer (10% FBS and 0.02% NaN3 in RPMI-1640 medium) | Antibody mix                               |
| CD45 (BV786)                 | HI30         | 1:100           | BD Biosciences | staining buffer (10% FBS and 0.02% NaN3 in RPMI-1640 medium) | Antibody mix                               |
| 7-Aminoactinomycin D (7-AAD) |              | 1:50            | BD Biosciences | Annexin V binding buffer                                     | Dead and apoptotic cell discrimination mix |
| PE-Annexin V                 |              | 1:50            | BD Biosciences | Annexin V binding buffer                                     | Dead and apoptotic cell discrimination mix |

**Table S3. ZIP synergy scores for NK-cell lines and PBMCs.**

| Target               |           | Glucocorticoids |            | MCL-1    | BCL-2/-xL  | BCL-2      | MDM-2       |            | Farnesyltransferase |            |    |
|----------------------|-----------|-----------------|------------|----------|------------|------------|-------------|------------|---------------------|------------|----|
| Cell line/<br>Sample | Readout   | Dexametha       | Methylpre  | S63845 + | Navitoclax | Venetoclax | Idasanutlin | Siremadlin | Tipifarnib +        | Lonafarnib |    |
|                      |           | sone +          | nisolone + |          |            |            |             |            |                     |            |    |
| YT                   | Toxicity  | 2,388           | -1,232     | 2,902    | -4,583     | 3,123      | -0,645      | 0,056      | 3,993               | 1,314      | >5 |
|                      | Viability | 16,62           | 7,411      | 11,742   | 1,085      | 0,665      | 7,754       | 5,521      | 8,053               | 2,649      | 3  |
| NK-YS                | Toxicity  | 14,715          | 9,558      | 3,628    | 0,155      | 11,64      | 9,172       | 4,931      | 8,282               | 7,122      | 1  |
|                      | Viability | 9,956           | 4,481      | 2,492    | 2,165      | 5,114      | 6,388       | 3,116      | 2,306               | 10,168     | 0  |
| SNK-6                | Toxicity  | 2,057           | -2,492     | 5,446    | -8,474     | 3,235      | -0,333      | 3,404      | 3,925               | 1,965      | -1 |
|                      | Viability | 7,128           | 1,211      | 4,135    | 0,391      | 2,188      | 8,009       | 4,944      | 6,756               | 1,432      | -3 |
| NK-92                | Toxicity  | -1,13           | -1,263     | 1,232    | 0,079      | 6,854      | 0,984       | 2,438      | 2,188               | 5,361      | <5 |
|                      | Viability | 11,888          | 2,879      | 3,982    | -0,701     | 1,304      | 3,221       | 3,839      | 6,541               | 0,531      |    |
| IMC-1                | Toxicity  | 2,726           | 2,988      | 4,214    | 0,274      | 7,671      | 2,289       | 2,563      | 2,67                | -4,652     |    |
|                      | Viability | 9,665           | 4,775      | 4,926    | 0,029      | -0,51      | -0,797      | 0,548      | 9,74                | -1,429     |    |
| KHYG-1               | Toxicity  | 8,382           | 6,028      | 5,706    | -3,632     | 4,848      | 0,19        | 0,391      | -7,531              | 1,937      |    |
|                      | Viability | 6,709           | 3,027      | 3,124    | -0,368     | 4,017      | 6,189       | 1,133      | 8,661               | 8,591      |    |
| NKL                  | Toxicity  | 0,27            | 1,865      | 1,575    | -4,212     | 3,934      | -0,79       | 1,459      | -1,483              | 3,966      |    |
|                      | Viability | 6,33            | 2,58       | 9,543    | 2,706      | 7,395      | -0,992      | 1,547      | 1,047               | -3,038     |    |
| PBMC_1               | Toxicity  | -0,918          | ND         | -1,055   | ND         | ND         | -0,165      | ND         | 1,043               | ND         |    |
|                      | Viability | 0,704           | ND         | 0,777    | ND         | ND         | 4,876       | ND         | 0,763               | ND         |    |
| PBMC_2               | Toxicity  | 1,234           | ND         | -0,078   | ND         | ND         | 1,624       | ND         | 2,368               | ND         |    |
|                      | Viability | 2,707           | ND         | 1,266    | ND         | ND         | 1,428       | ND         | -3,491              | ND         |    |

ND = not determined

## Supplemental Figures

### Figure S1. BCL2 homology domain 3 (BH3) profiling.

Short-term drug treatment (16 h) coupled with the BH3 profiling assay could predict the cytotoxic effect of ruxolitinib. 1000 nM ruxolitinib induced BIM-, BID- and HRK- dependent apoptosis in NK-YS cells more efficiently than in NKL cells.

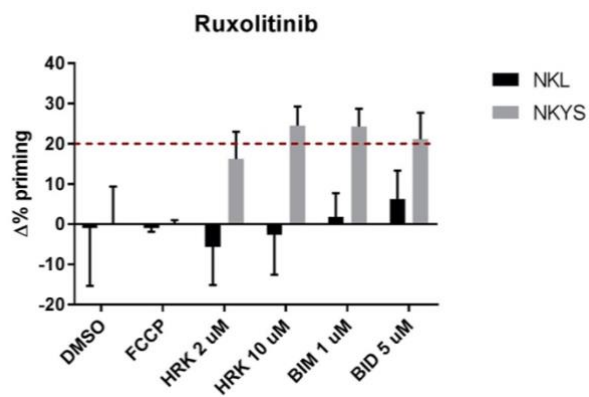

**Figure S2. Extended drug response assays: 9-day treatment and 3-day treatment, 6-day recovery assay.**

Box indicates standard deviation, line median, plus (+) sign mean and bar minimum and maximum of *STAT3* and *TP53* mutant cell lines. Cell viabilities are normalized to positive and negative controls.

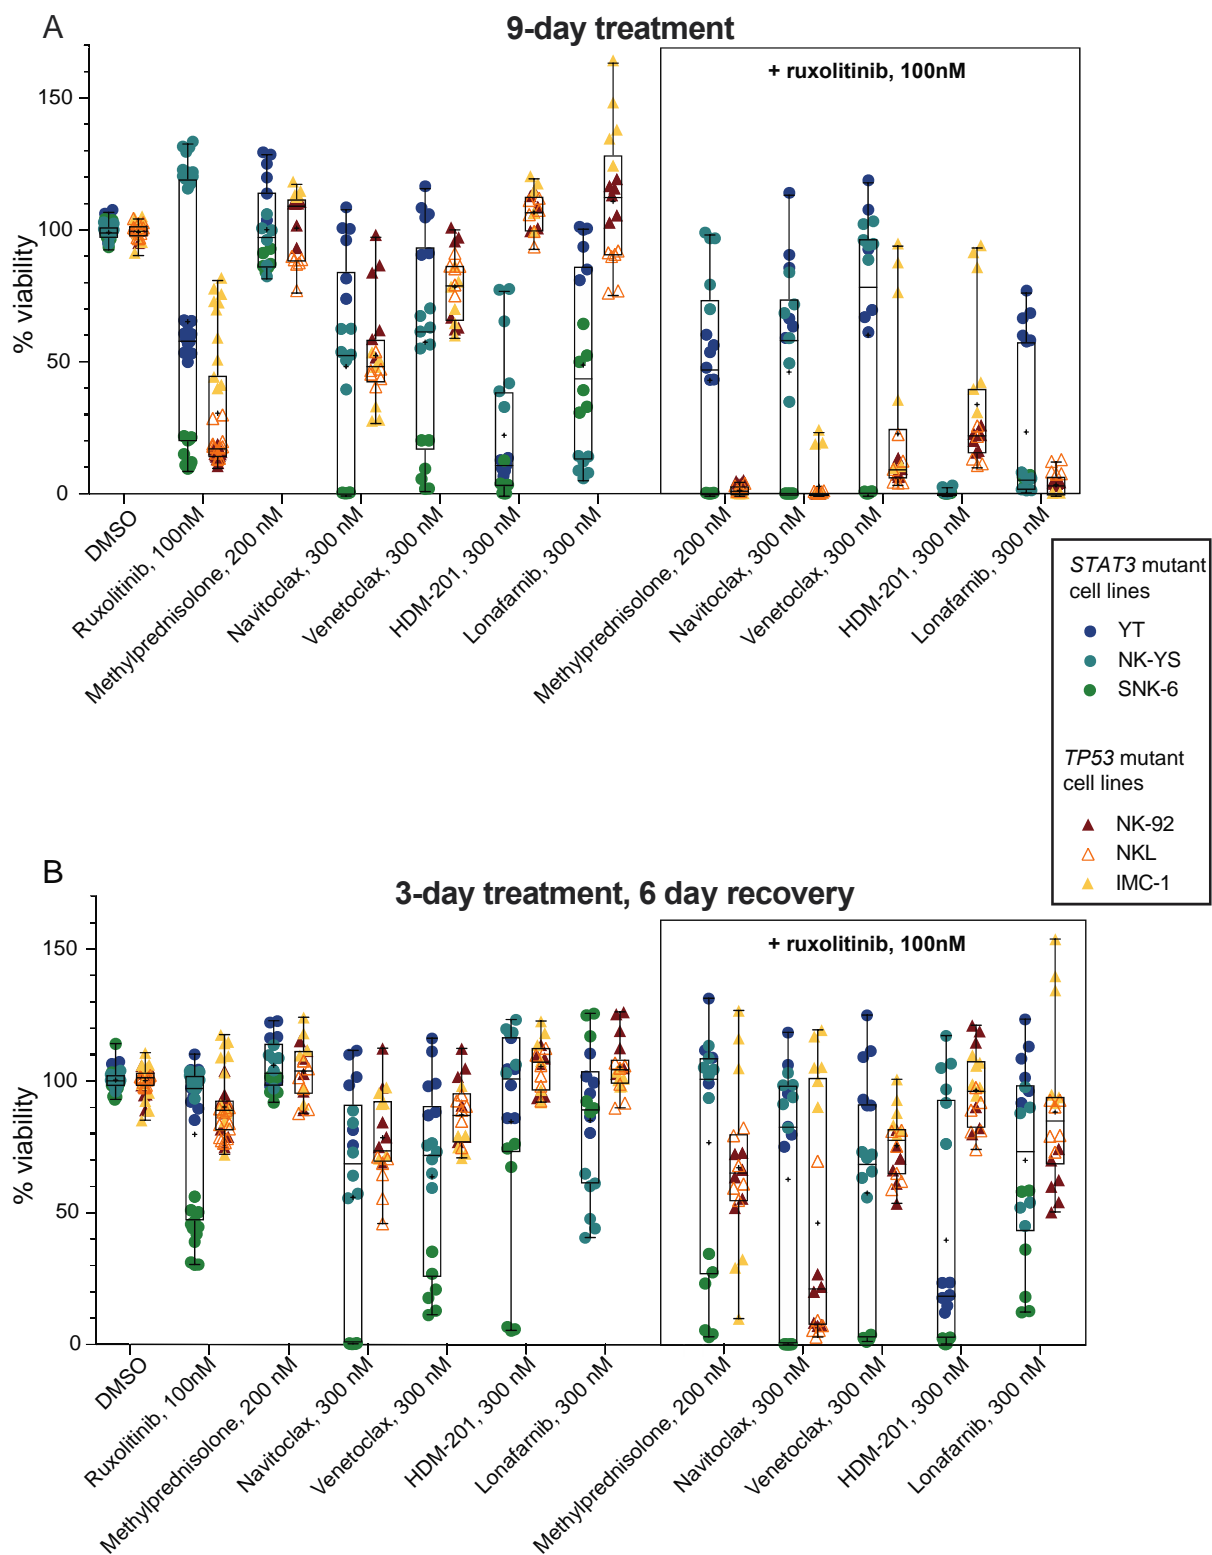

**Figure S3. Time-to-progression assay graphs for ruxolitinib combined with dexamethasone or S63845.**

Treatments were maintained for 30 days (gray area) with single drugs and their combinations, and followed for another 30 to 32 days after drug removal (white area). Dexamethasone treated **a-c** *STAT3* mutant and **d-f** *TP53* mutant cells. MCL-1 inhibitor S63845 treated **g-i** *STAT3* mutant cells and **j-i** *TP53* mutant cells. Cells were counted and drug and media were replenished every third to fourth day and set to 3 to 3.5×10<sup>5</sup> cells/ml cell density. Cultures were stopped when reaching 20 million (2 duplications from start).

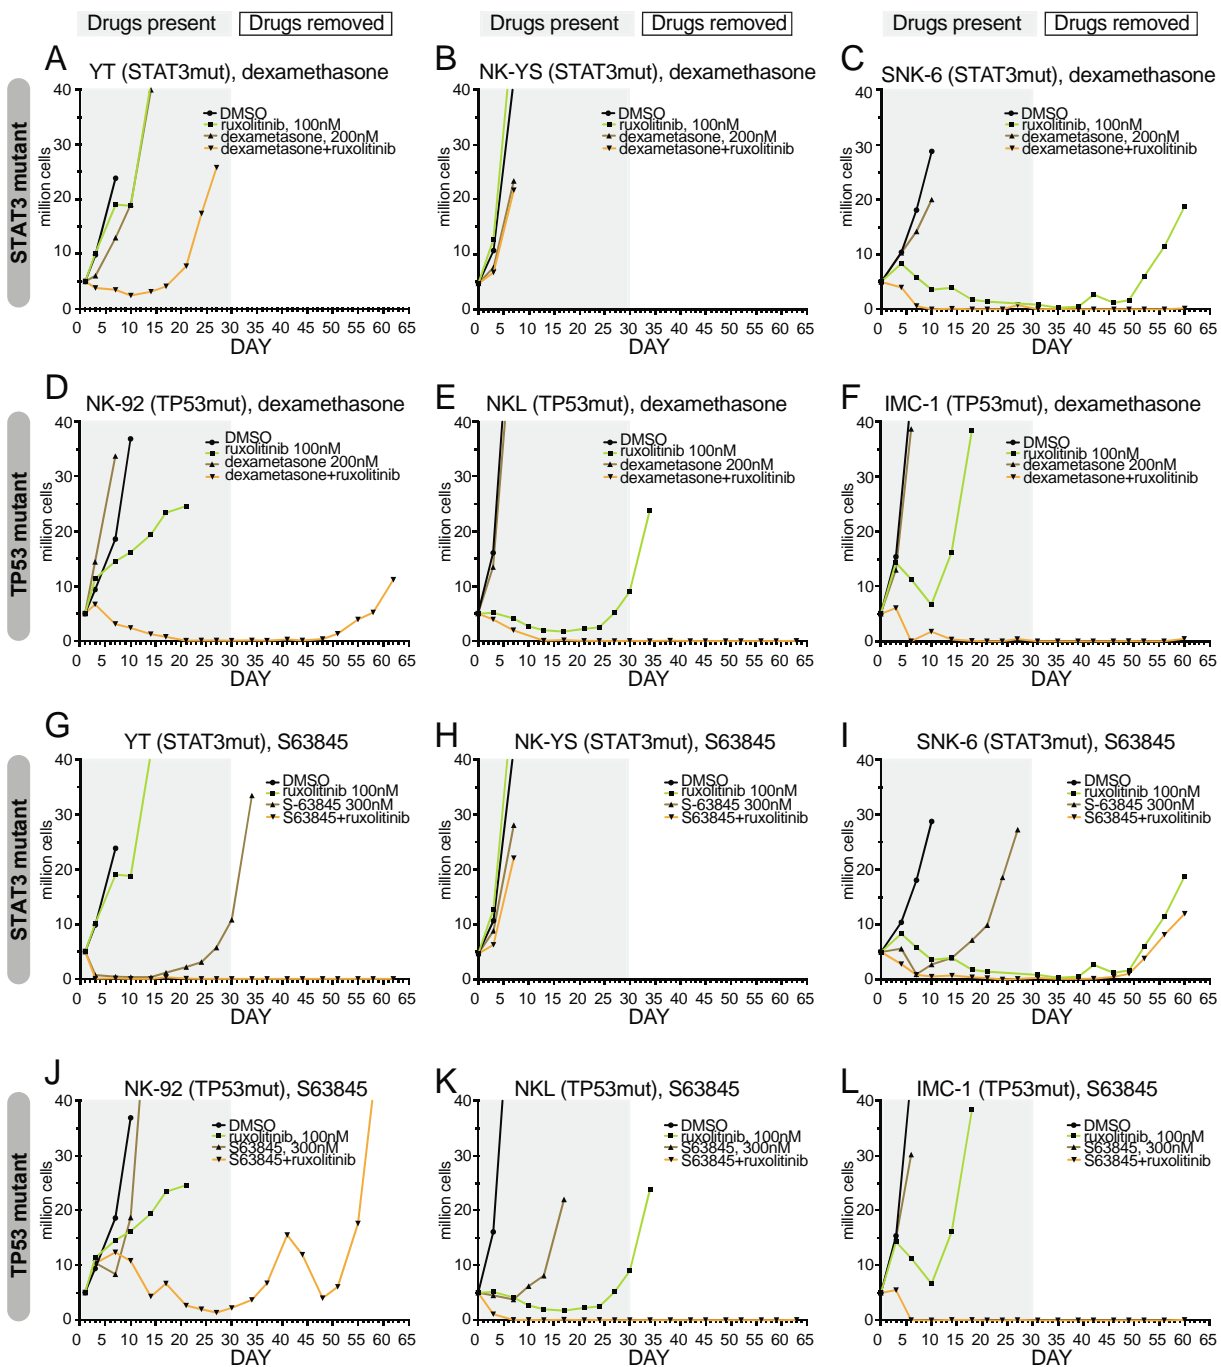



**Figure S4. Comparison of top drug combination responses on NK-cell lines and PBMCs.** Ruxo. = ruxolitinib; dexa/dexameth. = dexamethasone. Supporting data for Fig. 6.

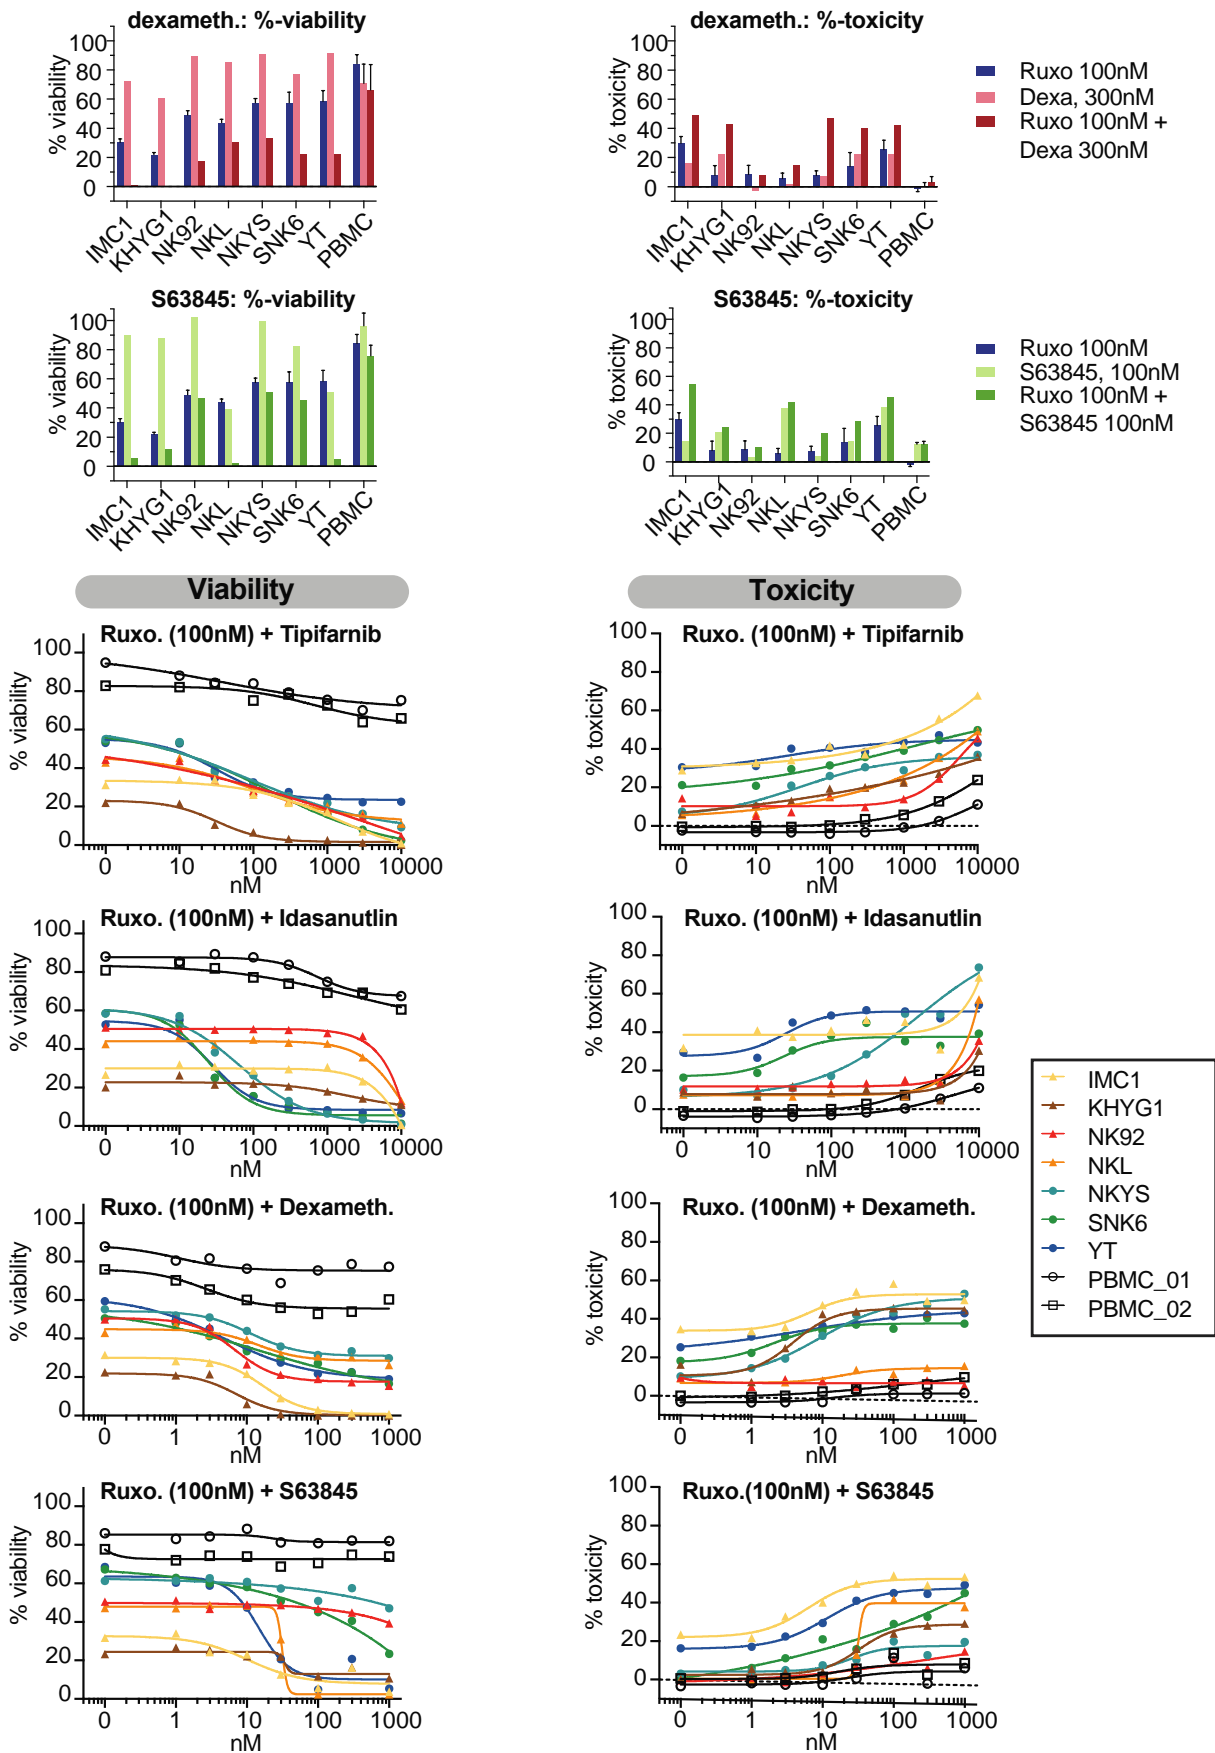

**Figure S5. Effect of dexamethasone or S63845 combined with ruxolitinib on healthy PBMC populations.**

**a-b** CD56+ NK-cells, **c-d** CD45+ leukocytes and **e-f** CD3+ T-cells.

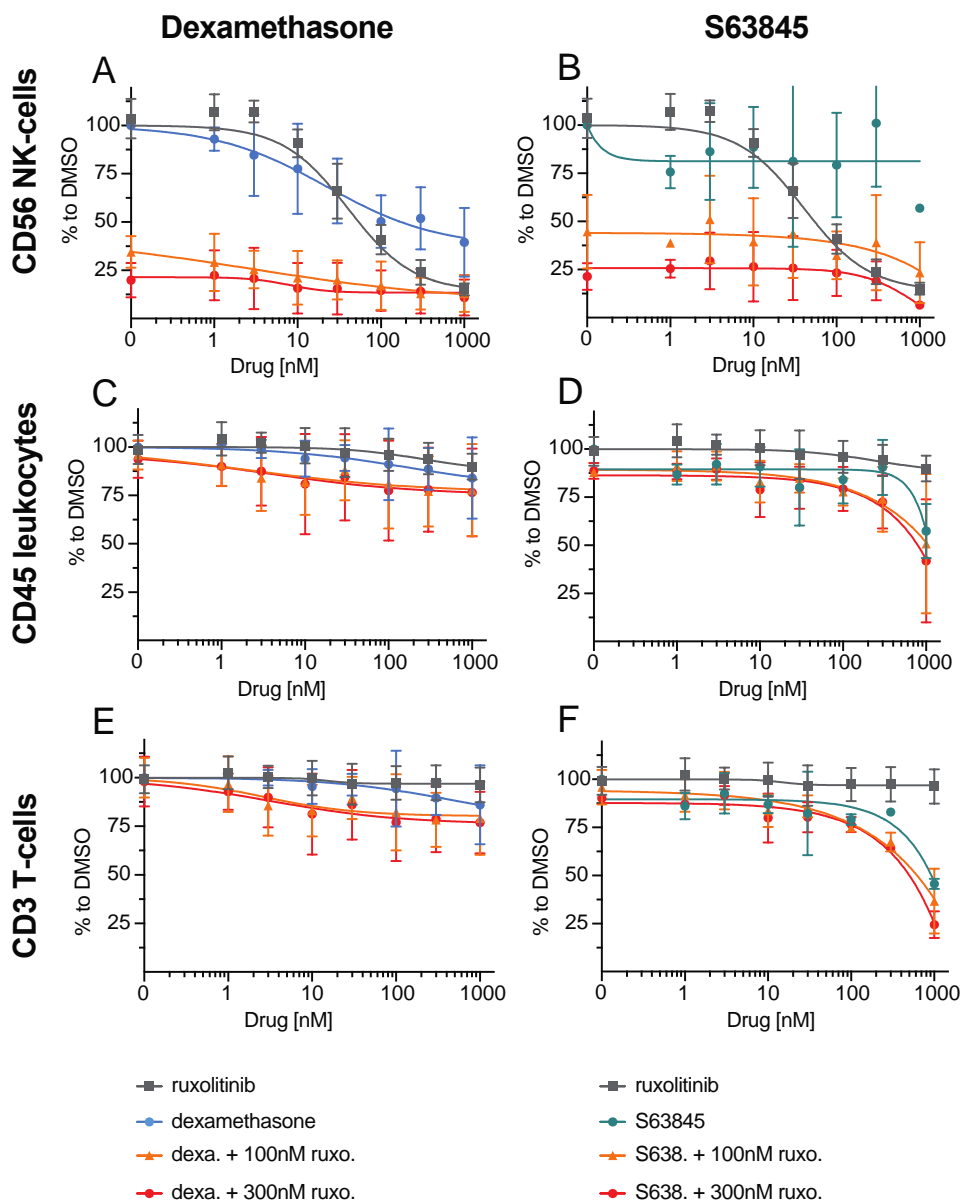

## Supplemental Materials and Methods

NK-YS and NKL cells were treated with 1000 nM ruxolitinib for 16 h prior to BH3 profiling. The BH3 profiling was performed according to the plate reader-based protocol by Ryan and Letai <sup>11</sup>, with minor modifications: 25 nl of 1000x BH3 peptide stocks or alamethicin control in DMSO were dispensed using an acoustic liquid dispenser (Echo 550, Labcyte Inc.) to 384-well plates (Corning) and 25 µl of cell suspension in 1x digitonin/JC1 solution was added to treatment and control wells. Kinetic changes in the total well fluorescence (590 nm) was measured using Cytation5 imaging multi-mode reader (BioTek) at 30°C for 3 h with 15 min intervals. Mitochondrial depolarization was quantified using the kinetic area under the curve (AUC) values according to formula: % depolarization =  $1 - \frac{(\text{sample-alamethicin})}{(\text{DMSO-alamethicin})}$ . Drug-induced apoptotic priming, or delta (% depolarization), was quantified as a difference between % depolarization values for BH3 only treated cells and ruxolitinib + BH3 treated cells.

## Supplemental References

1. Dufva O, Kankainen M, Kelkka T, et al. Aggressive natural killer-cell leukemia mutational landscape and drug profiling highlight JAK-STAT signaling as therapeutic target. *Nat Commun.* 2018;9(1):1567.
2. Robertson MJ, Cochran KJ, Cameron C, Le JM, Tantravahi R, Ritz J. Characterization of a cell line, NKL, derived from an aggressive human natural killer cell leukemia. *Experimental hematology.* 1996;24(3):406-415.
3. Drexler HG, Matsuo Y. Malignant hematopoietic cell lines: in vitro models for the study of natural killer cell leukemia-lymphoma. *Leukemia.* 2000;14(5):777-782.
4. Gong JH, Maki G, Klingemann HG. Characterization of a human cell line (NK-92) with phenotypical and functional characteristics of activated natural killer cells. *Leukemia.* 1994;8(4):652-658.
5. Chen IM, Whalen M, Bankhurst A, et al. A new human natural killer leukemia cell line, IMC-1. A complex chromosomal rearrangement defined by spectral karyotyping: functional and cytogenetic characterization. *Leuk Res.* 2004;28(3):275-284.
6. Yagita M, Huang CL, Umehara H, et al. A novel natural killer cell line (KHYG-1) from a patient with aggressive natural killer cell leukemia carrying a p53 point mutation. *Leukemia.* 2000;14(5):922-930.
7. Tsuchiyama J, Yoshino T, Mori M, et al. Characterization of a novel human natural killer-cell line (NK-YS) established from natural killer cell lymphoma/leukemia associated with Epstein-Barr virus infection. *Blood.* 1998;92(4):1374-1383.
8. Yodoi J, Teshigawara K, Nikaido T, et al. TCGF (IL 2)-receptor inducing factor(s). I. Regulation of IL 2 receptor on a natural killer-like cell line (YT cells). *J Immunol.* 1985;134(3):1623-1630.
9. Yoneda N, Tatsumi E, Kawano S, et al. Detection of Epstein-Barr virus genome in natural-killer-like cell line, YT. *Leukemia.* 1992;6(2):136-141.
10. Nagata H, Konno A, Kimura N, et al. Characterization of novel natural killer (NK)-cell and gammadelta T-cell lines established from primary lesions of nasal T/NK-cell lymphomas associated with the Epstein-Barr virus. *Blood.* 2001;97(3):708-713.
11. Ryan J, Letai A. BH3 profiling in whole cells by fluorimeter or FACS. *Methods.* 2013;61(2):156-164.
